# Supplementary material for: Exploring the Cocrystal Landscape of Posaconazole by Combining High-Throughput Screening Experimentation with Computational Chemistry
Source: PubMed Central journal article supplement — Cryst Growth Des. 2022 Dec 23;23(2):842–52. doi: 10.1021/acs.cgd.2c01072 (PMC9896487; doi:10.1021/acs.cgd.2c01072), 2022-12-23
Supplement: cg2c01072_si_001.pdf [file cg2c01072_si_001.pdf]

# Exploring the Cocrystal Landscape of Posaconazole by Combining High-throughput Screening Experimentation with Computational Chemistry

*Matteo Guidetti<sup>a</sup>, Rolf Hilfiker<sup>a</sup>, Martin Kuentz<sup>b</sup>, Annette Bauer-Brandl<sup>c</sup>, Fritz Blatter<sup>a\*</sup>*

*<sup>a</sup>Solvias AG, Solid-State Development Department, Römerpark 2, CH- 4303 Kaiseraugst,  
Switzerland*

*<sup>b</sup>University of Applied Sciences and Arts Northwestern Switzerland, Institute of Pharma  
Technology, CH- 4132 Muttenz, Switzerland*

*<sup>c</sup>Department of Physics, Chemistry and Pharmacy, University of Southern Denmark,  
Campusvej 55, 5230 Odense, Denmark*

\*Email: [fritz.blatter@solvias.com](mailto:fritz.blatter@solvias.com)

## Supporting Information

### Table of Contents

|          |                                   |           |
|----------|-----------------------------------|-----------|
| <b>1</b> | <b>Cocrystal Screening</b>        | <b>5</b>  |
| 1.1      | COSMOquick Screening              | 5         |
| <b>2</b> | <b>Posaconazole</b>               | <b>12</b> |
| 2.1      | DSC                               | 12        |
| 2.2      | Raman Spectrum                    | 12        |
| 2.3      | Powder X-ray Diffraction Patterns | 13        |

|          |                                                                      |           |
|----------|----------------------------------------------------------------------|-----------|
| 2.4      | Proton Nuclear Magnetic resonance ( <sup>1</sup> H-NMR)              | 14        |
| <b>3</b> | <b>Posaconazole – Ferulic Acid Hydrate Cocrystal (PSZ-FER-H2O)</b>   | <b>15</b> |
| 3.1      | TG-FTIR                                                              | 15        |
| 3.2      | Raman Spectrum                                                       | 16        |
| 3.3      | Powder X-ray Diffraction Patterns                                    | 16        |
| 3.4      | Proton Nuclear Magnetic Resonance ( <sup>1</sup> H-NMR)              | 17        |
| <b>4</b> | <b>Posaconazole – Maleic Acid Cocrystal (PSZ-MLE)</b>                | <b>18</b> |
| 4.1      | DSC                                                                  | 18        |
| 4.2      | TG-FTIR                                                              | 18        |
| 4.3      | Raman Spectrum                                                       | 19        |
| 4.4      | Powder X-ray Diffraction Patterns                                    | 19        |
| 4.5      | Proton Nuclear Magnetic Resonance ( <sup>1</sup> H-NMR)              | 20        |
| <b>5</b> | <b>Posaconazole – L-Malic Acid Cocrystal (PSZ-MLA)</b>               | <b>21</b> |
| 5.1      | DSC                                                                  | 21        |
| 5.2      | TG-FTIR                                                              | 21        |
| 5.3      | Raman Spectrum                                                       | 22        |
| 5.4      | Powder X-ray Diffraction Patterns                                    | 22        |
| 5.5      | Proton Nuclear Magnetic Resonance ( <sup>1</sup> H-NMR)              | 23        |
| <b>6</b> | <b>Posaconazole – Citric Acid Cocrystal (PSZ-CIT)</b>                | <b>24</b> |
| 6.1      | DSC                                                                  | 24        |
| 6.2      | TG-FTIR                                                              | 24        |
| 6.3      | Raman Spectrum                                                       | 25        |
| 6.4      | Powder X-ray Diffraction Patterns                                    | 25        |
| 6.5      | Proton Nuclear Magnetic Resonance ( <sup>1</sup> H-NMR)              | 26        |
| <b>7</b> | <b>Posaconazole – 1-Hydroxy-2-naphthoic Acid Cocrystal (PSZ-XIN)</b> | <b>27</b> |
| 7.1      | DSC                                                                  | 27        |
| 7.2      | TG-FTIR                                                              | 27        |
| 7.3      | Raman Spectrum                                                       | 28        |
| 7.4      | Powder X-ray Diffraction Patterns                                    | 28        |
| 7.5      | Proton Nuclear Magnetic Resonance ( <sup>1</sup> H-NMR)              | 29        |
| <b>8</b> | <b>Posaconazole – Gentisic Acid Cocrystal (PSZ-GEN)</b>              | <b>30</b> |
| 8.1      | DSC                                                                  | 30        |
| 8.2      | TG-FTIR                                                              | 30        |
| 8.3      | Raman Spectrum                                                       | 31        |
| 8.4      | Powder X-ray Diffraction Patterns                                    | 31        |
| 8.5      | Proton Nuclear Magnetic Resonance ( <sup>1</sup> H-NMR)              | 32        |
| <b>9</b> | <b>Posaconazole – Salicylic Acid Cocrystal (PSZ-SAL)</b>             | <b>33</b> |

|           |                                                                                |           |
|-----------|--------------------------------------------------------------------------------|-----------|
| 9.1       | DSC                                                                            | 33        |
| 9.2       | TG-FTIR                                                                        | 33        |
| 9.3       | Raman Spectrum                                                                 | 34        |
| 9.4       | Powder X-ray Diffraction Pattern                                               | 34        |
| 9.5       | Proton Nuclear Magnetic Resonance ( <sup>1</sup> H-NMR)                        | 35        |
| <b>10</b> | <b>Posaconazole – 4-Aminobenzoic Acid Cocrystal (PSZ-ABA)</b>                  | <b>36</b> |
| 10.1      | DSC                                                                            | 36        |
| 10.2      | TG-FTIR                                                                        | 36        |
| 10.3      | Raman Spectrum                                                                 | 37        |
| 10.4      | Powder X-ray Diffraction Patterns                                              | 37        |
| 10.5      | Proton Nuclear Magnetic Resonance ( <sup>1</sup> H-NMR)                        | 38        |
| <b>11</b> | <b>Posaconazole – L-Lactic Acid Cocrystal (PSZ-LLA)</b>                        | <b>39</b> |
| 11.1      | DSC                                                                            | 39        |
| 11.2      | TG-FTIR                                                                        | 39        |
| 11.3      | Raman Spectrum                                                                 | 40        |
| 11.4      | Powder X-ray Diffraction Patterns                                              | 40        |
| 11.5      | Proton Nuclear Magnetic Resonance ( <sup>1</sup> H-NMR)                        | 41        |
| <b>12</b> | <b>Posaconazole – Adipic Acid Hydrate Cocrystal (PSZ-ADI-H<sub>2</sub>O)</b>   | <b>41</b> |
| 12.1      | DSC                                                                            | 40        |
| 12.2      | TG-FTIR                                                                        | 41        |
| 12.3      | Raman Spectrum                                                                 | 42        |
| 12.4      | Powder X-ray Diffraction Patterns                                              | 43        |
| 12.5      | Proton Nuclear Magnetic Resonance ( <sup>1</sup> H-NMR)                        | 43        |
| <b>13</b> | <b>Posaconazole – Succinic Acid Hydrate Cocrystal (PSZ-SUC-H<sub>2</sub>O)</b> | <b>44</b> |
| 13.1      | TG-FTIR                                                                        | 44        |
| 13.2      | Raman Spectrum                                                                 | 45        |
| 13.3      | Powder X-ray Diffraction Patterns                                              | 45        |
| 13.4      | Proton Nuclear Magnetic Resonance ( <sup>1</sup> H-NMR)                        | 46        |
| <b>14</b> | <b>Posaconazole – Fumaric Acid THF Solvate Cocrystal (PSZ-FUM-THF)</b>         | <b>46</b> |
| 14.1      | TG-FTIR                                                                        | 46        |
| 14.2      | Raman Spectrum                                                                 | 47        |
| 14.3      | Powder X-ray Diffraction Patterns                                              | 48        |
| 14.4      | Proton Nuclear Magnetic Resonance ( <sup>1</sup> H-NMR)                        | 48        |
| <b>15</b> | <b>Posaconazole – Fumaric Acid Hydrate Cocrystal (PSZ-FUM-H<sub>2</sub>O)</b>  | <b>49</b> |
| 15.1      | TG-FTIR                                                                        | 49        |
| 15.2      | Raman Spectrum                                                                 | 50        |
| 15.3      | Powder X-ray Diffraction Patterns                                              | 50        |

|           |                                                                                           |           |
|-----------|-------------------------------------------------------------------------------------------|-----------|
| 15.4      | Proton Nuclear Magnetic Resonance ( <sup>1</sup> H-NMR)                                   | 51        |
| <b>16</b> | <b>Posaconazole – 3,4-Dihydroxybenzoic Acid Hydrate Cocrystal(PSZ-DHB-H<sub>2</sub>O)</b> | <b>52</b> |
| 16.1      | TG-FTIR                                                                                   | 52        |
| 16.2      | Raman Spectrum                                                                            | 53        |
| 16.3      | Powder X-ray Diffraction Patterns                                                         | 53        |
| 16.4      | Proton Nuclear Magnetic Resonance ( <sup>1</sup> H-NMR)                                   | 54        |
| <b>17</b> | <b>Posaconazole-Oxalic Acid complex</b>                                                   | <b>55</b> |
| 17.1.1    | Powder X-ray Diffraction patterns                                                         | 55        |
| <b>18</b> | <b>Computational Tools Comparison</b>                                                     | <b>55</b> |
| 18.1      | Hydrogen Bond Propensity                                                                  | 55        |
| 18.2      | Molecular Complementarity                                                                 | 57        |

# 1 Cocystal screening

## 1.1 COSMOquick screening

**Table S1.** COSMOquick cofomer screening performed on a list of 140 compounds. For each cofomer the number of rotatable bonds, the  $F_{\text{screen}}$  function and the mixing enthalpy ( $\Delta H_{\text{mix}}$ ) are computed. Cofomers are ranked according to the  $F_{\text{screen}}$  values. The 28 cofomers employed in the experimental screening are highlighted in green. The 28 candidates were selected in order to span the whole range of screening function value, comprising in this way top-, middle- and low-ranked cofomers. The selection was devised in order to test the prediction ability of COSMOquick, determining if the top-ranked compounds provide more experimental cocystals compared to the low-ranked ones.

| Cofomer                        | number rotatable bonds | $F_{\text{screen}}$ | cofomer ranking | $\Delta H_{\text{mix}}$ (kcal/mol) |
|--------------------------------|------------------------|---------------------|-----------------|------------------------------------|
| 1,5-Naphthalenedisulfonic acid | 4.0                    | 0.24                | 1               | -8.43                              |
| Oxalic acid                    | 3.0                    | 1.48                | 2               | -6.68                              |
| Myricetin                      | 7.0                    | 1.83                | 3               | -8.38                              |
| Gallic acid                    | 5.0                    | 2.61                | 4               | -6.58                              |
| Benzenesulfonic acid           | 2.0                    | 3.56                | 5               | -4.09                              |
| 3,4-Dihydroxybenzoic acid      | 4.0                    | 3.58                | 6               | -5.09                              |
| Naphthalene-2-sulfonic acid    | 2.0                    | 3.61                | 7               | -4.04                              |
| Toluenesulfonic acid           | 2.0                    | 3.69                | 8               | -3.96                              |
| Gentisic acid                  | 4.0                    | 3.84                | 9               | -4.84                              |
| Fumaric acid                   | 4.0                    | 4.05                | 10              | -4.63                              |
| DL-Tartaric acid               | 7.0                    | 4.08                | 11              | -6.12                              |
| L-Tartaric acid                | 7.0                    | 4.08                | 12              | -6.12                              |
| Cyclamic acid                  | 3.0                    | 4.22                | 13              | -3.94                              |
| Maleic acid                    | 4.0                    | 4.47                | 14              | -4.2                               |
| Trans-Aconitic acid            | 7.0                    | 4.63                | 15              | -5.57                              |
| 1-Hydroxy-2-naphthoic acid     | 3.0                    | 4.71                | 16              | -3.46                              |
| Pamoic acid                    | 8.0                    | 4.81                | 17              | -5.9                               |
| Methyl gallate                 | 5.0                    | 4.87                | 18              | -4.31                              |

|                            |     |      |    |       |
|----------------------------|-----|------|----|-------|
| 2-Oxoglutaric acid         | 6.0 | 5.14 | 19 | -4.55 |
| 3-Hydroxy-2-naphthoic acid | 3.0 | 5.18 | 20 | -2.98 |
| Salicylic acid             | 3.0 | 5.2  | 21 | -2.97 |
| L-Malic acid               | 6.0 | 5.3  | 22 | -4.39 |
| Ethyl gallate              | 6.0 | 5.37 | 23 | -4.32 |
| Orotic acid                | 2.0 | 5.68 | 24 | -1.98 |
| 5-Methylantranilic acid    | 3.0 | 5.71 | 25 | -2.45 |
| Citric acid                | 9.0 | 5.72 | 26 | -5.51 |
| Benzoic acid               | 2.0 | 5.73 | 27 | -1.92 |
| Succinic acid              | 5.0 | 5.74 | 28 | -3.44 |
| 4-Aminosalicylic acid      | 4.0 | 5.82 | 29 | -2.85 |
| Propyl gallate             | 7.0 | 5.9  | 30 | -4.3  |
| Saccharin                  | 0.0 | 6.13 | 31 | -1.02 |
| Vanillic acid              | 4.0 | 6.14 | 32 | -2.54 |
| Piperazine                 | 0.0 | 6.27 | 33 | -0.87 |
| DL-Mandelic acid           | 4.0 | 6.28 | 34 | -2.39 |
| Methyl paraben             | 3.0 | 6.33 | 35 | -1.84 |
| Malonic acid               | 4.0 | 6.35 | 36 | -2.32 |
| N-Hydroxy-succinimide      | 1.0 | 6.4  | 37 | -0.74 |
| Glycolic acid              | 3.0 | 6.43 | 38 | -1.73 |
| L-Lactic acid              | 3.0 | 6.46 | 39 | -1.71 |
| 4-Aminobenzoic acid        | 3.0 | 6.48 | 40 | -1.68 |
| Acetylsalicylic acid       | 4.0 | 6.71 | 41 | -1.96 |
| Nicotinic acid             | 2.0 | 6.75 | 42 | -0.9  |
| Methyl phenyl sulfoxide    | 1.0 | 6.77 | 43 | -0.37 |
| Benzylamine                | 2.0 | 6.8  | 44 | -0.85 |
| Ascorbic acid              | 6.0 | 6.85 | 45 | -2.84 |
| Naphthalene-2-sulfonamide  | 2.0 | 6.92 | 46 | -0.73 |
| Ferulic acid               | 5.0 | 6.94 | 47 | -2.25 |
| Glutaric acid              | 6.0 | 6.96 | 48 | -2.74 |
| Phenylacrylic acid         | 3.0 | 6.96 | 49 | -1.2  |

|                                 |            |             |           |              |
|---------------------------------|------------|-------------|-----------|--------------|
| Beta-Alanine                    | 4.0        | 6.97        | 50        | -1.7         |
| Sorbic acid                     | 3.0        | 6.98        | 51        | -1.18        |
| Abietic acid                    | 3.0        | 6.99        | 52        | -1.17        |
| Glucuronic acid                 | 6.0        | 7.08        | 53        | -2.62        |
| <b>Maltol</b>                   | <b>1.0</b> | <b>7.1</b>  | <b>54</b> | <b>-0.04</b> |
| L-Pyroglutamic acid             | 2.0        | 7.13        | 55        | -0.53        |
| p-Toluenesulfonamide            | 2.0        | 7.14        | 56        | -0.51        |
| 2,4-Diamino-6-hydroxyPyrimidine | 3.0        | 7.14        | 57        | -1.02        |
| Caffeine                        | 0.0        | 7.16        | 58        | 0.02         |
| Imidazole                       | 0.0        | 7.17        | 59        | 0.02         |
| 3-Aminobenzyl alcohol           | 3.0        | 7.25        | 60        | -0.91        |
| Uric Acid                       | 0.0        | 7.29        | 61        | 0.15         |
| Thymine                         | 0.0        | 7.31        | 62        | 0.17         |
| Adenine                         | 1.0        | 7.33        | 63        | 0.18         |
| L-Aspartic acid                 | 6.0        | 7.36        | 64        | -2.34        |
| L-Carnitine                     | 4.0        | 7.36        | 65        | -1.32        |
| Uracil                          | 0.0        | 7.41        | 66        | 0.27         |
| Guanine                         | 1.0        | 7.42        | 67        | 0.28         |
| Acedoben                        | 4.0        | 7.43        | 68        | -1.24        |
| Syringic acid                   | 5.0        | 7.45        | 69        | -1.74        |
| Ethylmaltol                     | 2.0        | 7.6         | 70        | -0.05        |
| <b>Adipic acid</b>              | <b>7.0</b> | <b>7.61</b> | <b>71</b> | <b>-2.59</b> |
| Cytosine                        | 1.0        | 7.62        | 72        | 0.48         |
| <b>Vanillin</b>                 | <b>3.0</b> | <b>7.63</b> | <b>73</b> | <b>-0.54</b> |
| Propionic acid                  | 2.0        | 7.66        | 74        | 0.01         |
| <b>L-Proline</b>                | <b>2.0</b> | <b>7.71</b> | <b>75</b> | <b>0.06</b>  |
| Caproic acid                    | 5.0        | 7.76        | 76        | -1.43        |
| 2-Morpholinoethanol             | 3.0        | 7.79        | 77        | -0.37        |
| D-Ribose                        | 4.0        | 7.8         | 78        | -0.88        |
| Eugenol                         | 4.0        | 7.88        | 79        | -0.8         |
| <b>Nicotinamide</b>             | <b>2.0</b> | <b>7.88</b> | <b>80</b> | <b>0.23</b>  |

|                    |      |      |     |       |
|--------------------|------|------|-----|-------|
| L-Menthol          | 2.0  | 7.91 | 81  | 0.26  |
| Urea               | 2.0  | 7.97 | 82  | 0.32  |
| Pyridoxine         | 5.0  | 7.97 | 83  | -1.21 |
| L-4-Hydroxyproline | 3.0  | 7.99 | 84  | -0.17 |
| Thymidine          | 4.0  | 8.0  | 85  | -0.67 |
| N-Acetylglycine    | 4.0  | 8.13 | 86  | -0.54 |
| L-Cysteine         | 3.0  | 8.19 | 87  | 0.03  |
| Hippuric acid      | 5.0  | 8.25 | 88  | -0.93 |
| Quinic acid        | 6.0  | 8.3  | 89  | -1.39 |
| Tyramine           | 4.0  | 8.45 | 90  | -0.22 |
| L-Alanine          | 3.0  | 8.46 | 91  | 0.29  |
| Glycine            | 3.0  | 8.6  | 92  | 0.44  |
| D-Serine           | 5.0  | 8.76 | 93  | -0.43 |
| L-Serine           | 5.0  | 8.76 | 94  | -0.43 |
| L-Tyrosine         | 6.0  | 8.78 | 95  | -0.91 |
| L-Phenylglycine    | 4.0  | 8.83 | 96  | 0.16  |
| Caprylic acid      | 7.0  | 8.84 | 97  | -1.36 |
| L-Valine           | 4.0  | 8.88 | 98  | 0.2   |
| D-Galactose        | 6.0  | 8.92 | 99  | -0.78 |
| L-Tryptophan       | 5.0  | 8.98 | 100 | -0.21 |
| Creatine           | 5.0  | 9.16 | 101 | -0.03 |
| L-Phenylalanine    | 5.0  | 9.31 | 102 | 0.12  |
| L-Leucine          | 5.0  | 9.35 | 103 | 0.17  |
| L-Isoleucine       | 5.0  | 9.37 | 104 | 0.18  |
| L-Histidine        | 5.0  | 9.37 | 105 | 0.18  |
| myo-Inositol       | 6.0  | 9.42 | 106 | -0.28 |
| L-Glutamic acid    | 7.0  | 9.46 | 107 | -0.75 |
| L-Asparagine       | 6.0  | 9.53 | 108 | -0.16 |
| Galactaric acid    | 11.0 | 9.75 | 109 | -2.49 |
| Diethanolamine     | 6.0  | 9.77 | 110 | 0.08  |
| L-Methionine       | 6.0  | 9.81 | 111 | 0.11  |



|                   |             |              |            |              |
|-------------------|-------------|--------------|------------|--------------|
| Sebacic acid      | 11.0        | 9.82         | 112        | -2.43        |
| D-Xylose          | 8.0         | 9.94         | 113        | -0.78        |
| D-Glucose         | 10.0        | 9.94         | 114        | -1.8         |
| D-Mannose         | 10.0        | 9.94         | 115        | -1.8         |
| Capric acid       | 9.0         | 9.94         | 116        | -1.28        |
| L-Lysine          | 6.0         | 9.95         | 117        | 0.26         |
| Tromethamine      | 6.0         | 9.97         | 118        | 0.28         |
| meso-Erythritol   | 7.0         | 10.0         | 119        | -0.2         |
| Undecylenic acid  | 10.0        | 10.34        | 120        | -1.39        |
| D-Gluconic acid   | 11.0        | 10.38        | 121        | -1.87        |
| L-Glutamine       | 7.0         | 10.43        | 122        | 0.22         |
| Riboflavin        | 9.0         | 10.86        | 123        | -0.36        |
| L-Arabitol        | 9.0         | 11.05        | 124        | -0.17        |
| <b>Xylitol</b>    | <b>9.0</b>  | <b>11.05</b> | <b>125</b> | <b>-0.17</b> |
| Triethanolamine   | 9.0         | 11.15        | 126        | -0.07        |
| L-Arginine        | 9.0         | 11.38        | 127        | 0.16         |
| D-Citrulline      | 9.0         | 11.72        | 128        | 0.5          |
| L-Citrulline      | 9.0         | 11.72        | 129        | 0.5          |
| D-Panthenol       | 10.0        | 11.73        | 130        | 0.0          |
| <b>D-Mannitol</b> | <b>11.0</b> | <b>11.8</b>  | <b>131</b> | <b>-0.44</b> |
| Sorbitol          | 11.0        | 11.8         | 132        | -0.44        |
| Gluceptate        | 13.0        | 12.07        | 133        | -1.19        |
| Lactose           | 12.0        | 12.18        | 134        | -0.57        |
| D-Maltose         | 12.0        | 12.18        | 135        | -0.57        |
| Aspartame         | 11.0        | 12.36        | 136        | 0.12         |
| Meglumine         | 11.0        | 12.43        | 137        | 0.18         |
| Sucrose           | 13.0        | 12.55        | 138        | -0.72        |
| Lactobionic acid  | 17.0        | 13.17        | 139        | -2.13        |
| Stearic acid      | 17.0        | 14.32        | 140        | -0.98        |
| Maltitol          | 17.0        | 15.28        | 141        | -0.03        |

**Table S2.** List of the 28 cofomers employed in PSZ cocrystal screening ranked according to COSMOquick  $F_{\text{screen}}$  function values. Acidic cofomers are highlighted in orange, neutral cofomers are highlighted in green.

| Coformer                  | Abbreviation | MW (g/mol) | COSMOquick ranking | $F_{\text{screen}}$ | $\Delta H_{\text{mix}}$ (Kcal/mol) |
|---------------------------|--------------|------------|--------------------|---------------------|------------------------------------|
| Oxalic acid               | OXA          | 90.04      | 2                  | 1.48                | -6.68                              |
| 3,4-Dihydroxybenzoic acid | DHB          | 154.12     | 6                  | 3.58                | -5.09                              |
| Gentisic acid             | GEN          | 154.12     | 9                  | 3.84                | -4.84                              |
| Fumaric acid              | FUM          | 116.07     | 10                 | 4.05                | -4.63                              |
| DL-Tartaric acid          | TAR          | 150.09     | 11                 | 4.08                | -6.12                              |
| L-Tartaric acid           | LTA          | 150.09     | 12                 | 4.08                | -6.12                              |
| Maleic acid               | MLE          | 116.07     | 14                 | 4.05                | -4.20                              |
| trans-Aconitic acid       | ACA          | 174.11     | 15                 | 4.63                | -5.57                              |
| 1-Hydroxy-2-naphtoic acid | XIN          | 188.18     | 16                 | 4.71                | -3.46                              |
| Salicylic acid            | SAL          | 138.12     | 21                 | 5.20                | -2.97                              |
| L-Malic acid              | MLA          | 134.09     | 22                 | 5.30                | -4.39                              |
| Citric acid               | CIT          | 192.12     | 26                 | 5.72                | -5.51                              |
| Benzoic acid              | BNZ          | 122.12     | 27                 | 5.73                | -1.92                              |
| Succinic acid             | SUC          | 118.09     | 28                 | 5.74                | -3.44                              |
| Vanillic acid             | VAN          | 168.15     | 32                 | 6.14                | -2.54                              |
| L-Lactic acid             | LLA          | 90.08      | 39                 | 6.46                | -1.71                              |
| 4-aminobenzoic acid       | ABA          | 137.14     | 40                 | 6.48                | -1.68                              |
| Nicotinic acid            | NIC          | 123.11     | 42                 | 6.75                | -0.90                              |
| Ferulic acid              | FER          | 194.18     | 47                 | 6.94                | -2.25                              |
| Maltol                    | MLL          | 126.11     | 54                 | 7.10                | -0.04                              |

|              |     |        |     |       |       |
|--------------|-----|--------|-----|-------|-------|
| Adipic acid  | ADI | 146.14 | 71  | 7.61  | -2.59 |
| Vanillin     | VLN | 152.15 | 73  | 7.63  | -0.54 |
| L-Proline    | PRO | 115.13 | 75  | 7.71  | 0.06  |
| Nicotinamide | NCT | 122.13 | 80  | 7.88  | 0.23  |
| Urea         | URE | 60.06  | 82  | 7.97  | 0.32  |
| Pyridoxine   | PYD | 169.18 | 83  | 7.97  | -1.21 |
| Xylitol      | XLT | 152.15 | 125 | 11.05 | -0.17 |
| D-Mannitol   | MNT | 182.17 | 131 | 11.80 | -0.44 |

|   | 1          | 2          | 3          | 4            | 5          | 6          | 7             | 8          | 9          | 10         | 11         | 12         |
|---|------------|------------|------------|--------------|------------|------------|---------------|------------|------------|------------|------------|------------|
| A | PSZ        | PSZ<br>MLA | PSZ<br>MNT | PSZ          | PSZ<br>MLA | PSZ<br>MNT | PSZ           | PSZ<br>MLA | PSZ<br>MNT | PSZ        | PSZ<br>MLA | PSZ<br>MNT |
| B | PSZ<br>ADI | PSZ<br>NIC | PSZ<br>NCT | PSZ<br>ADI   | PSZ<br>NIC | PSZ<br>NCT | PSZ<br>ADI    | PSZ<br>NIC | PSZ<br>NCT | PSZ<br>ADI | PSZ<br>NIC | PSZ<br>NCT |
| C | PSZ<br>BNZ | PSZ<br>OXA | PSZ<br>PRO | PSZ<br>BNZ   | PSZ<br>OXA | PSZ<br>PRO | PSZ<br>BNZ    | PSZ<br>OXA | PSZ<br>PRO | PSZ<br>BNZ | PSZ<br>OXA | PSZ<br>PRO |
| D | PSZ<br>CIT | PSZ<br>SUC | PSZ<br>PYD | PSZ<br>CIT   | PSZ<br>SUC | PSZ<br>PYD | PSZ<br>CIT    | PSZ<br>SUC | PSZ<br>PYD | PSZ<br>CIT | PSZ<br>SUC | PSZ<br>PYD |
| E | PSZ<br>FUM | PSZ<br>TAR | PSZ<br>URE | PSZ<br>FUM   | PSZ<br>TAR | PSZ<br>URE | PSZ<br>FUM    | PSZ<br>TAR | PSZ<br>URE | PSZ<br>FUM | PSZ<br>TAR | PSZ<br>URE |
| F | PSZ<br>GEN | PSZ<br>LTA | PSZ<br>VLN | PSZ<br>GEN   | PSZ<br>LTA | PSZ<br>VLN | PSZ<br>GEN    | PSZ<br>LTA | PSZ<br>VLN | PSZ<br>GEN | PSZ<br>LTA | PSZ<br>VLN |
| G | PSZ<br>LLA | PSZ<br>VAN | PSZ<br>XLT | PSZ<br>LLA   | PSZ<br>VAN | PSZ<br>XLT | PSZ<br>LLA    | PSZ<br>VAN | PSZ<br>XLT | PSZ<br>LLA | PSZ<br>VAN | PSZ<br>XLT |
| H | PSZ<br>MLE | PSZ<br>MLL | PSZ<br>ACA | PSZ<br>MLE   | PSZ<br>MLL | PSZ<br>ACA | PSZ<br>MLE    | PSZ<br>MLL | PSZ<br>ACA | PSZ<br>MLE | PSZ<br>MLL | PSZ<br>ACA |
|   | Ethanol    |            |            | Acetonitrile |            |            | Ethyl acetate |            |            | THF:H2O    |            |            |

**Figure S1.** Layout of the 96-wells microtiter plate employed in the HTS of PSZ; the solvent employed in the slurry equilibration step is reported in red. Posaconazole was employed as control in wells A1, A4, A7 and A10.

## 2 Posaconazole

### 2.1 DSC

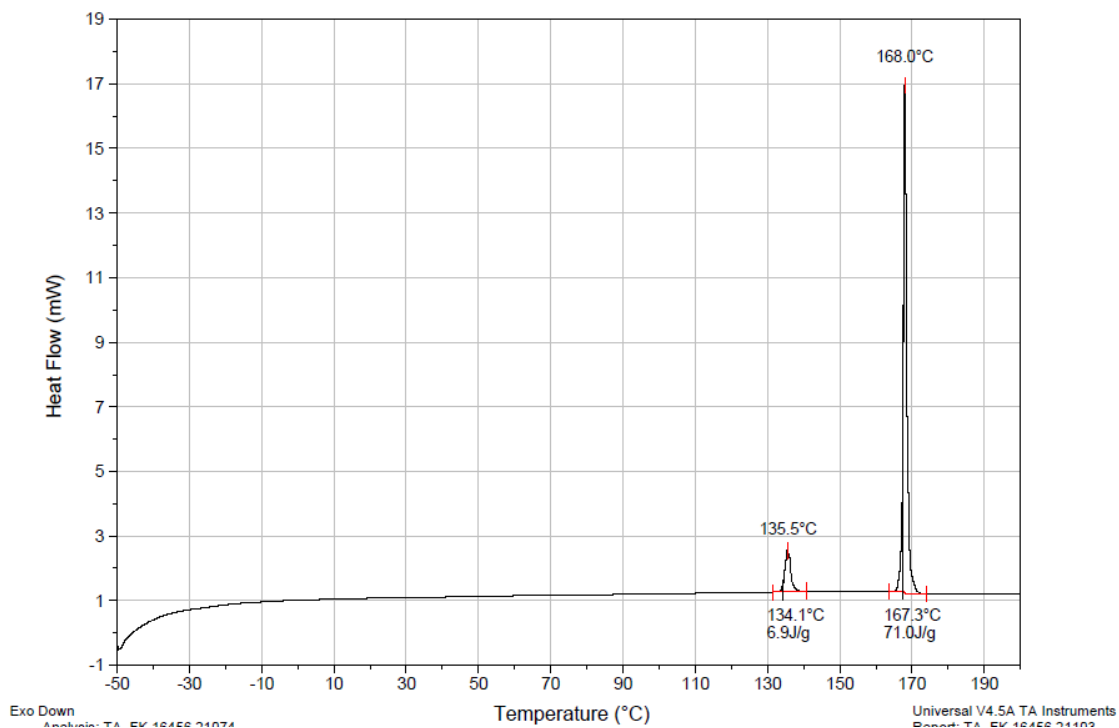

**Figure S2.** DSC thermogram of PSZ Form I, collected with a heating rate of 10 K/min. Posaconazole Form I was obtained by slurry equilibration of the purchased compound in ethanol for two days.

### 2.2 Raman Spectrum

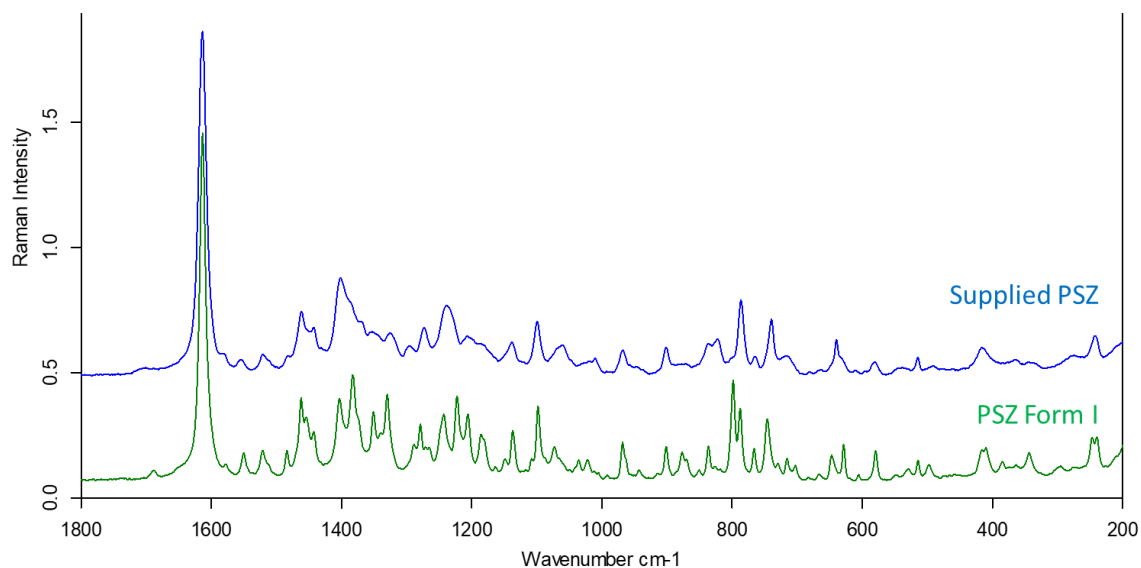

**Figure S3.** FT-Raman spectrum of PSZ form I and the purchased posaconazole, confirming the increased amorphicity of the latter.

## 2.3 Powder X-ray Diffraction Patterns

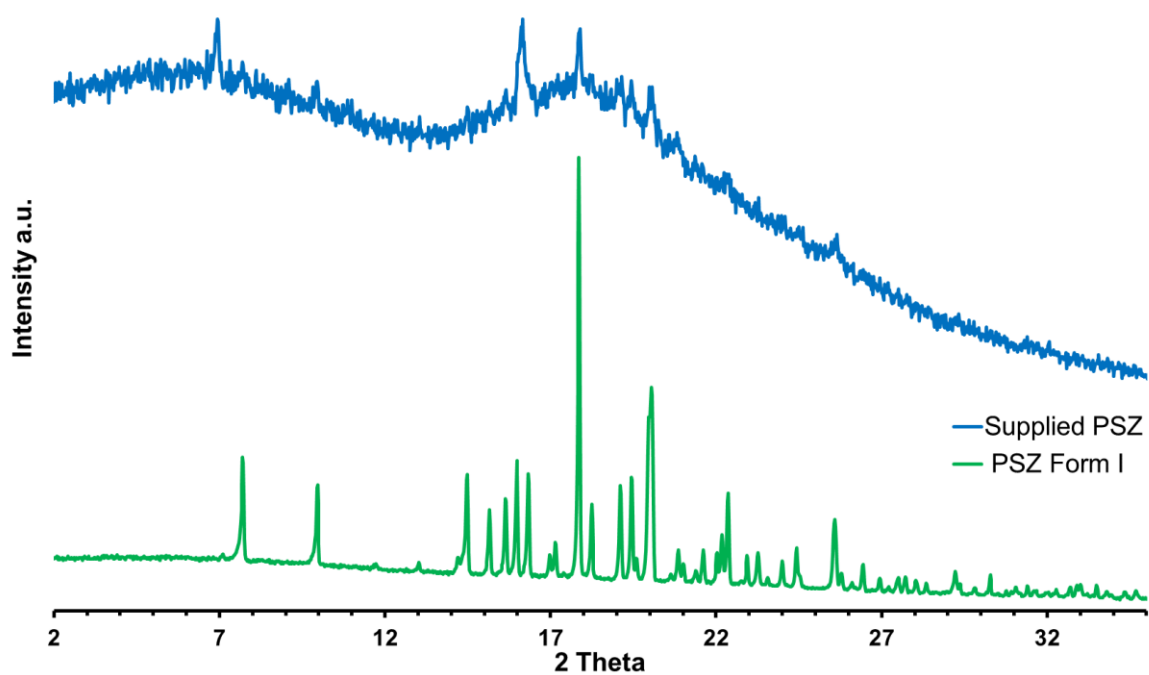

**Figure S4.** PXRD patterns of purchased posaconazole (blue, top) and PSZ Form I (green, bottom).

## 2.4 Proton Nuclear Magnetic resonance (<sup>1</sup>H-NMR)

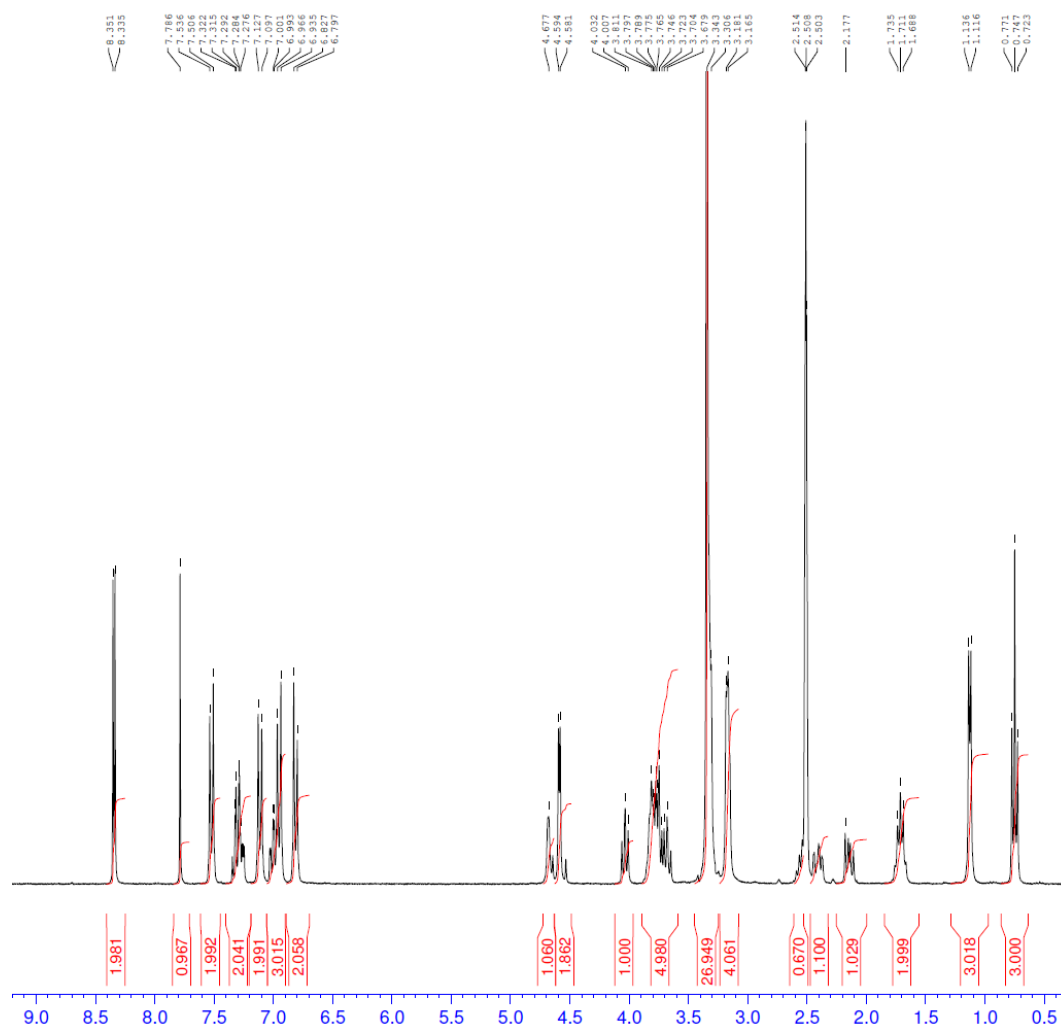

**Figure S5.** Proton NMR spectrum of purchased posaconazole collected in deuterated DMSO.

### 3 Posaconazole – Ferulic Acid Hydrate Cocrystal (PSZ-FER-H<sub>2</sub>O)

#### 3.1 TG-FTIR

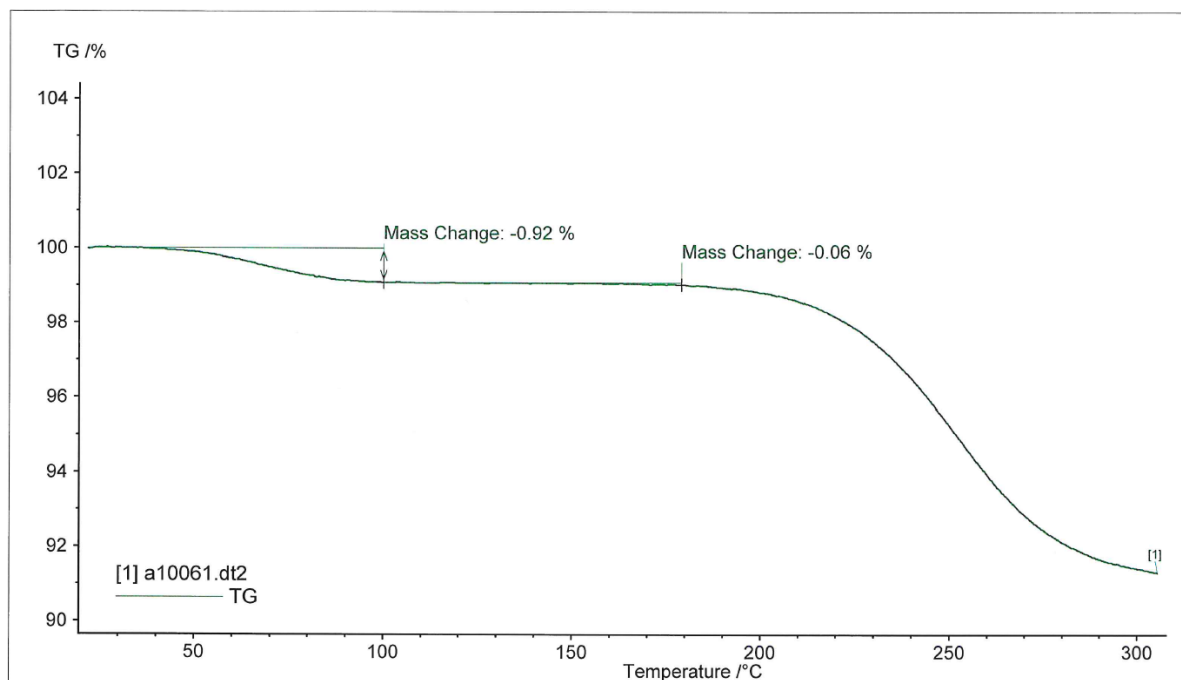

**Figure S6.** TG-FTIR thermogram of PSZ-FER-H<sub>2</sub>O, collected with a heating rate of 10 K/min.

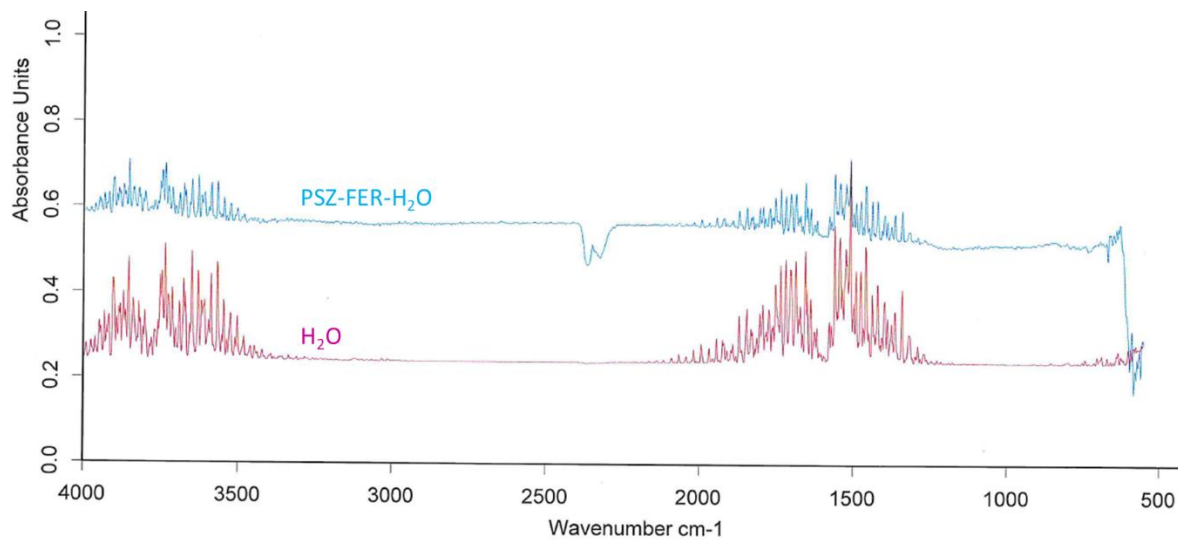

**Figure S7.** Comparison of the IR spectrum of the gas released at 70°C (blue) with the reference spectrum of H<sub>2</sub>O (red).

### 3.2 Raman Spectrum

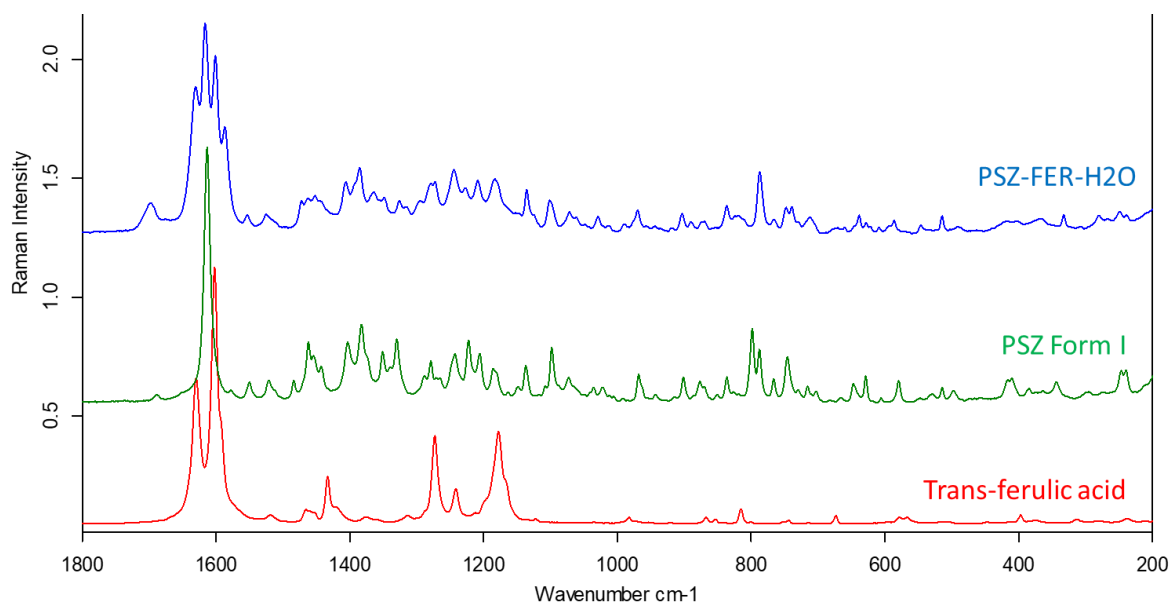

Figure S8. FT-Raman spectra of PSZ Form I, trans-ferulic acid and PSZ-FER-H2O.

### 3.3 Powder X-ray Diffraction Patterns

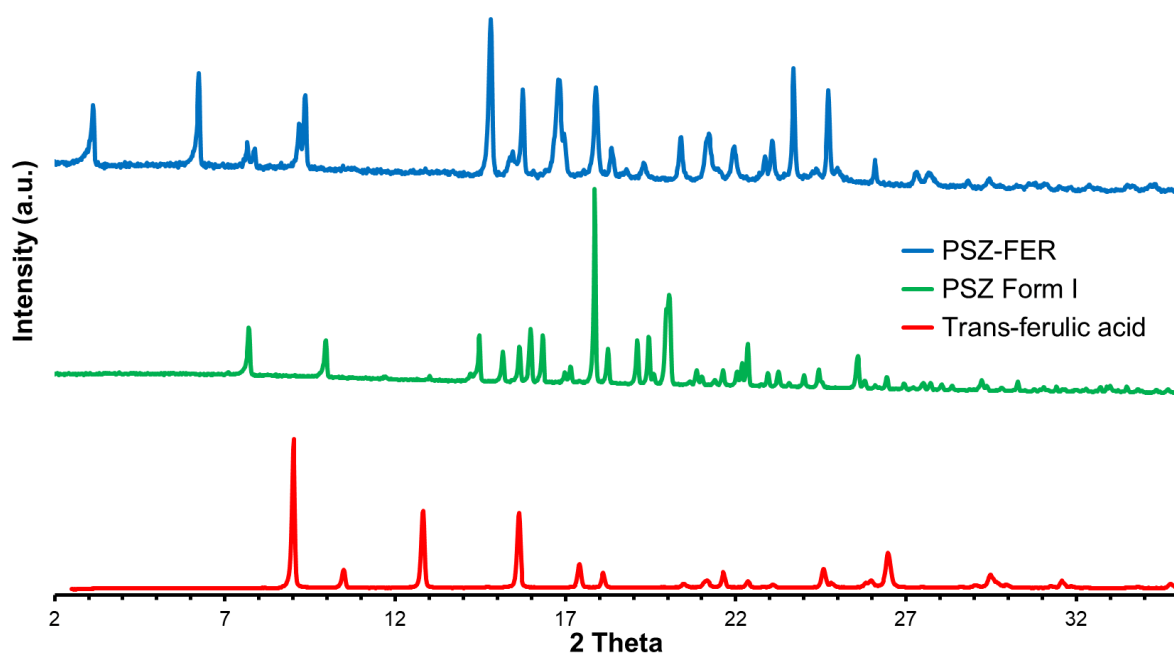

Figure S9. PXRD patterns of PSZ Form I, trans-ferulic acid and PSZ-FER-H2O.



### 3.4 Proton Nuclear Magnetic Resonance ( $^1\text{H-NMR}$ )

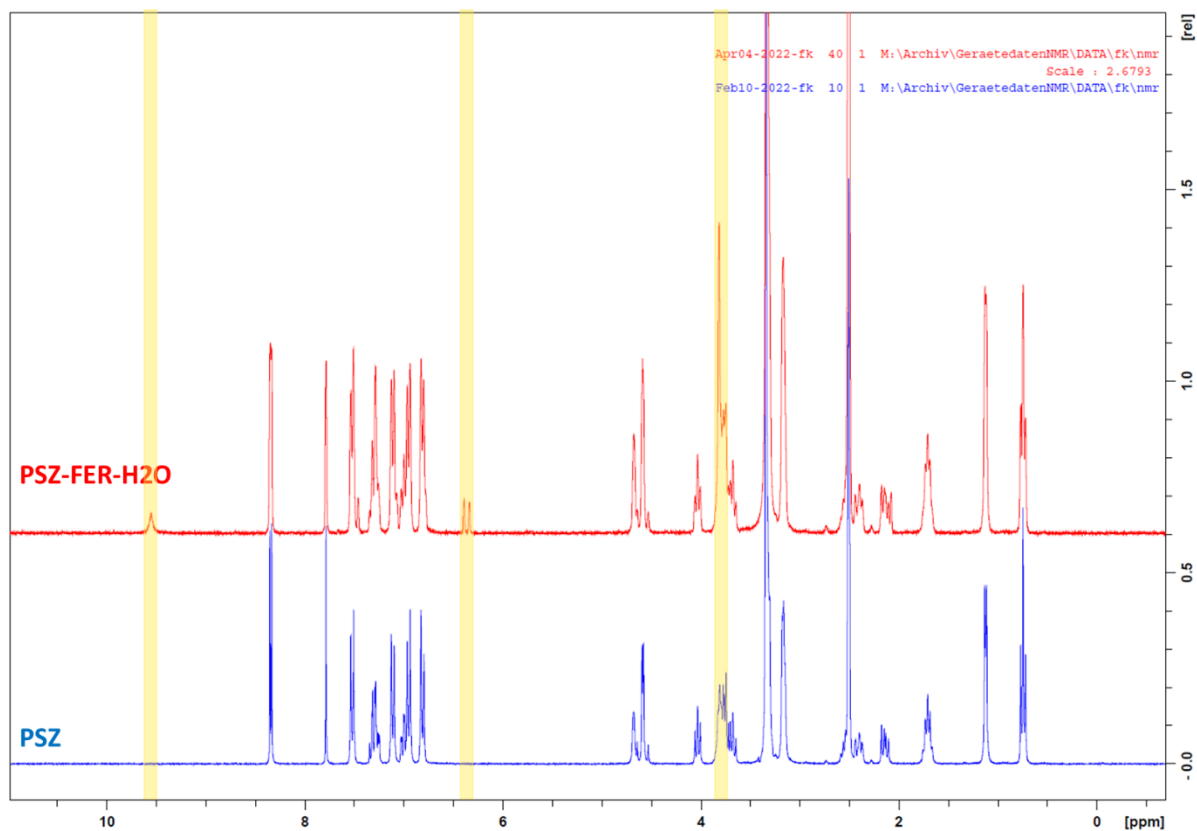

**Figure S10.** Proton NMR spectra of PSZ-FER-H<sub>2</sub>O and PSZ in deuterated DMSO; chemical shifts reported in ppm. The peaks of the cofomer are highlighted in yellow.

## 4 Posaconazole – Maleic Acid Cocystal (PSZ-MLE)

### 4.1 DSC

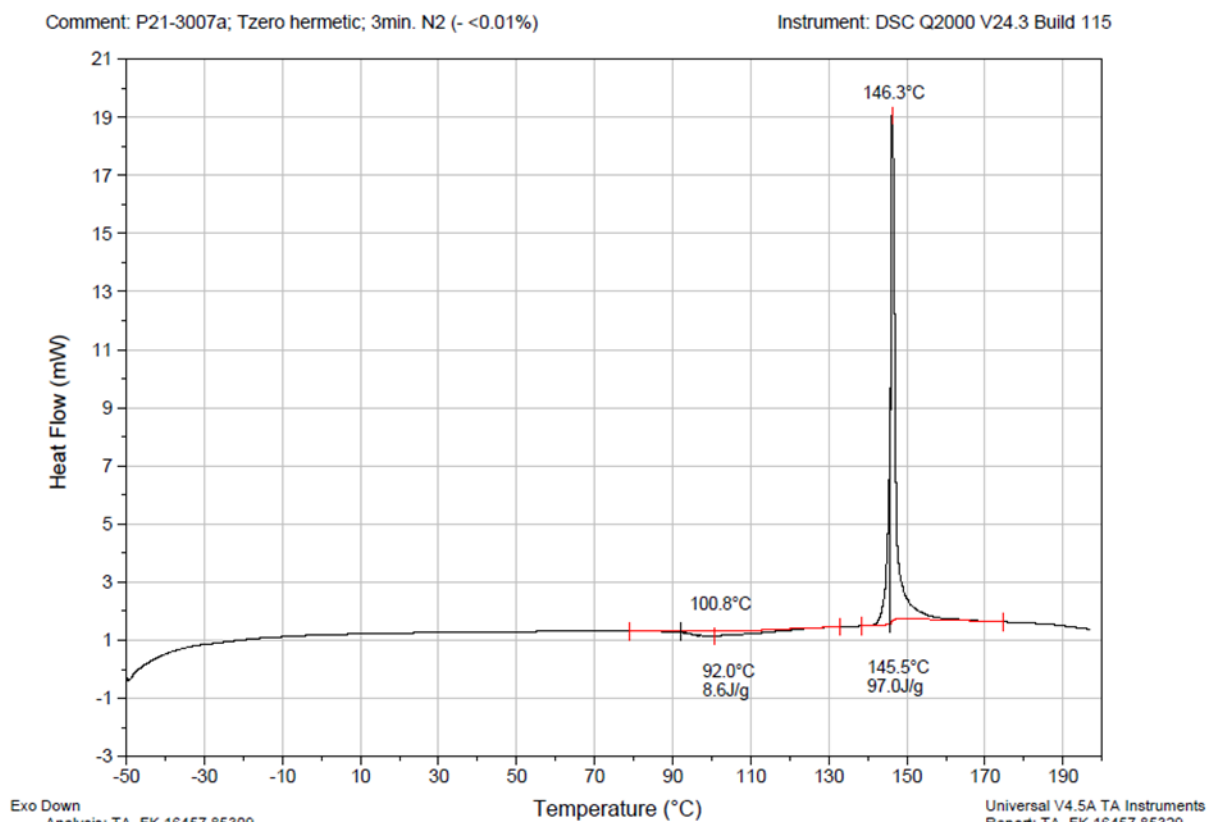

Figure S11. DSC thermogram of PSZ-MLE, collected with a heating rate of 10 K/min.

### 4.2 TG-FTIR

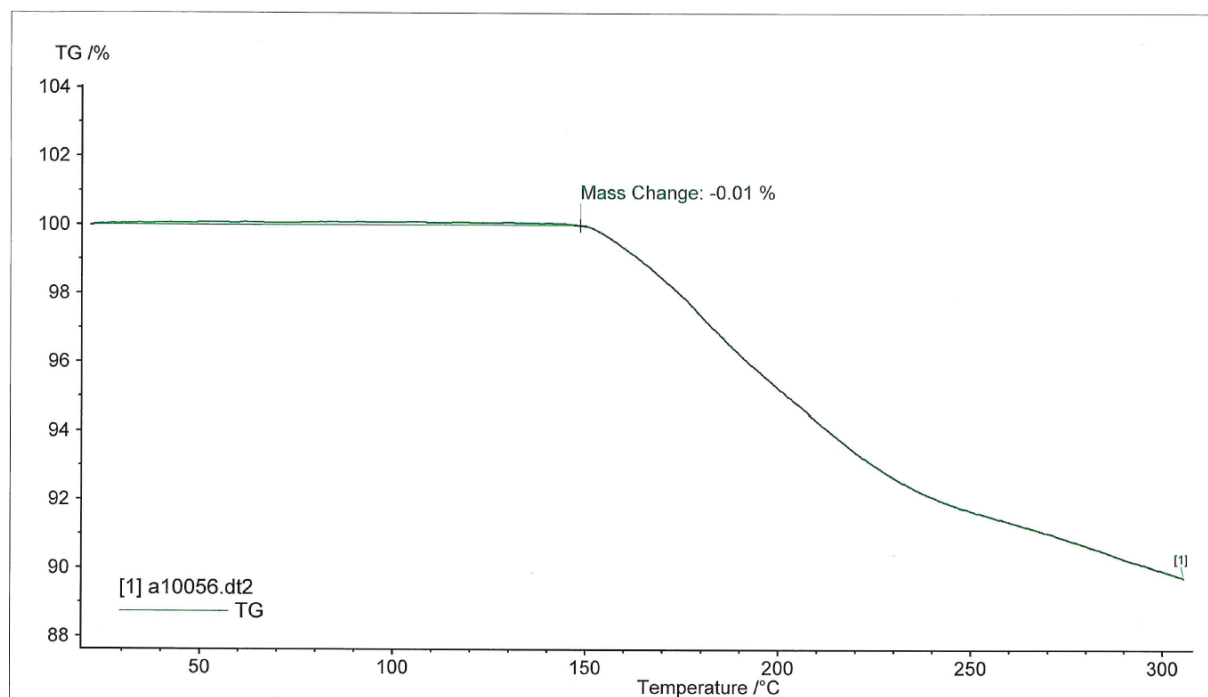

Figure S12. TG-FTIR thermogram of PSZ-MLE

### 4.3 Raman Spectrum

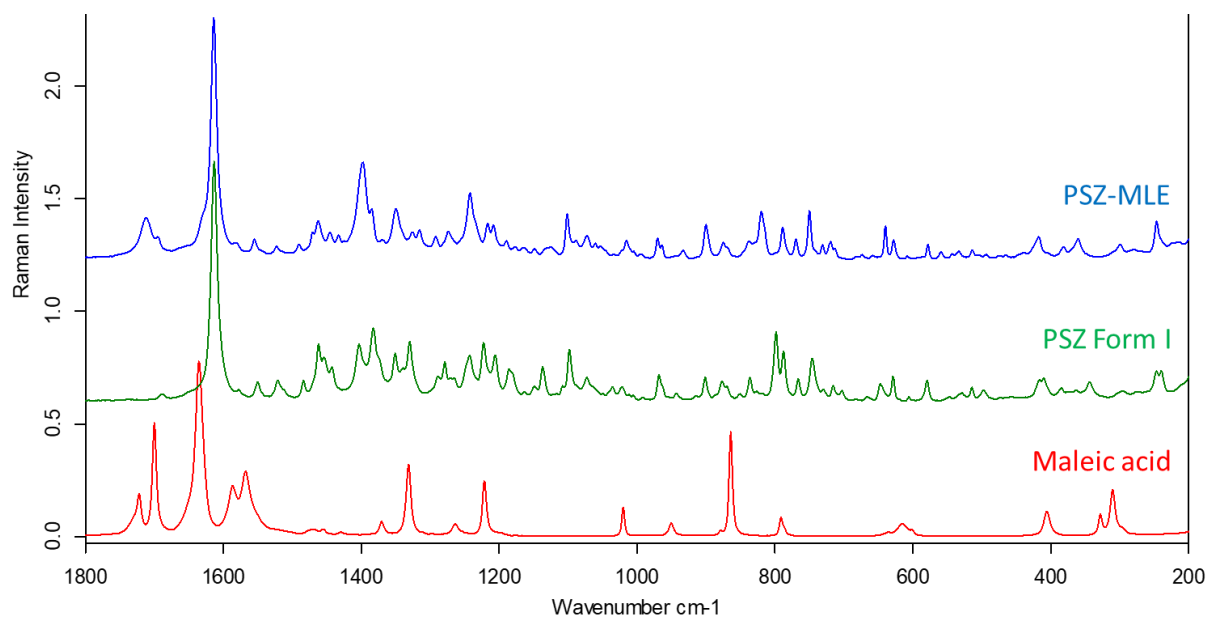

Figure S13. FT-Raman spectra of PSZ Form I, Maleic acid and PSZ-MLE.

### 4.4 Powder X-ray Diffraction Patterns

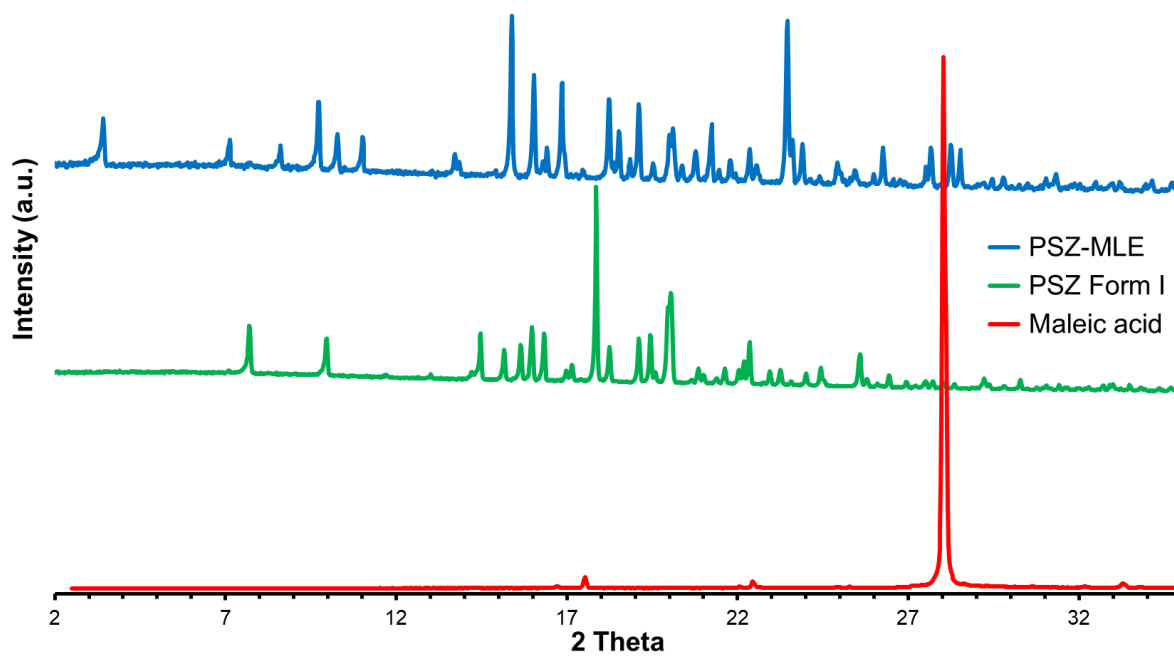

Figure S14. PXRD patterns of PSZ Form I, Maleic acid and PSZ-MLE.

## 4.5 Proton Nuclear Magnetic Resonance ( $^1\text{H-NMR}$ )

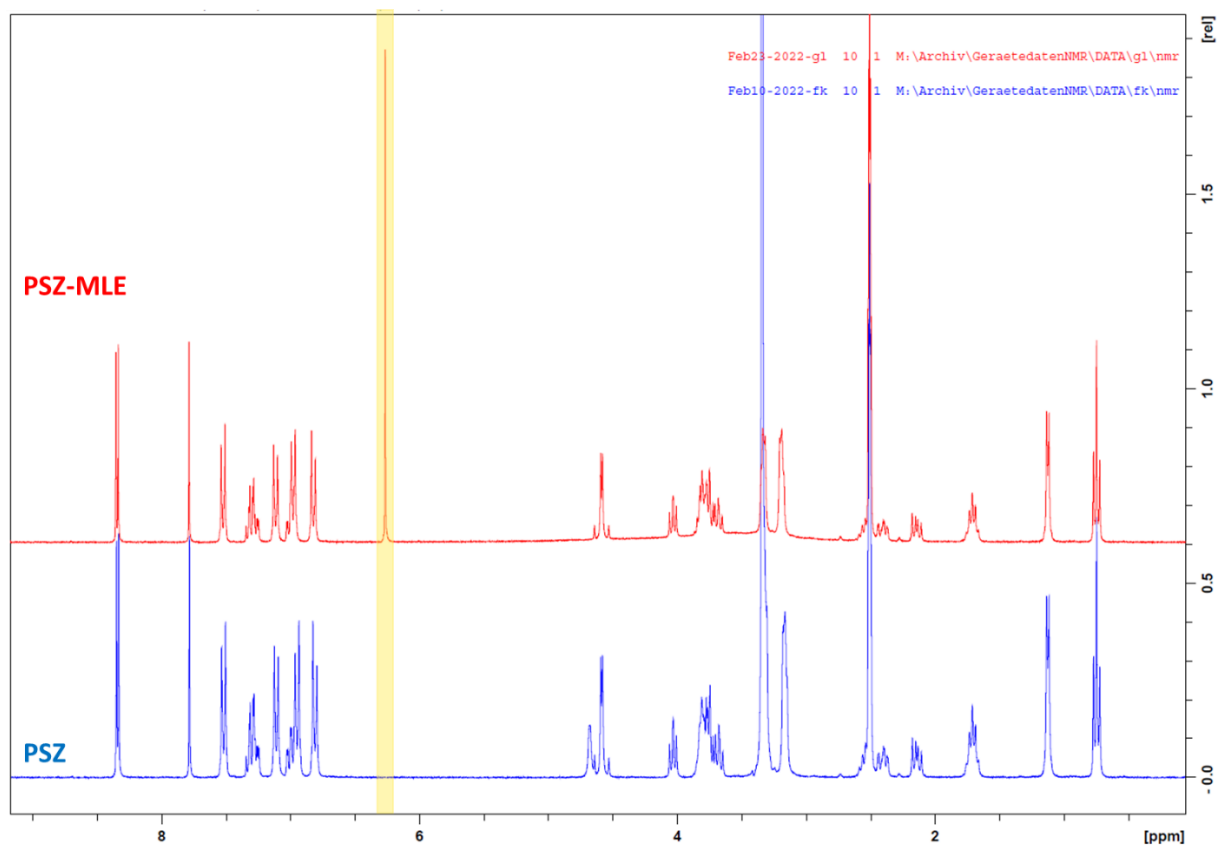

**Figure S15.** Proton NMR spectra of PSZ-MLE and PSZ in deuterated DMSO; chemical shifts reported in ppm. The peaks of the coformer are highlighted in yellow.

## 5 Posaconazole – L-Malic Acid Cocystal (PSZ-MLA)

### 5.1 DSC

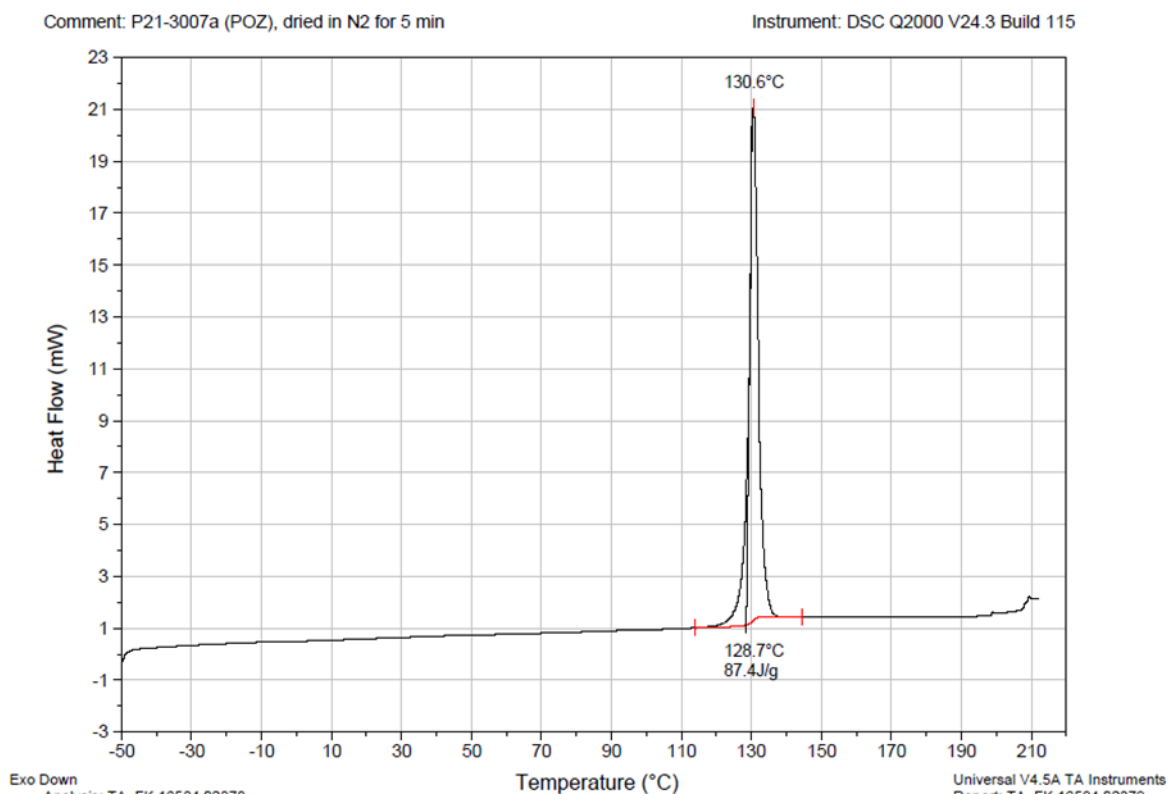

Figure S16. DSC thermogram of PSZ-MLA, collected with a heating rate of 10 K/min.

### 5.2 TG-FTIR

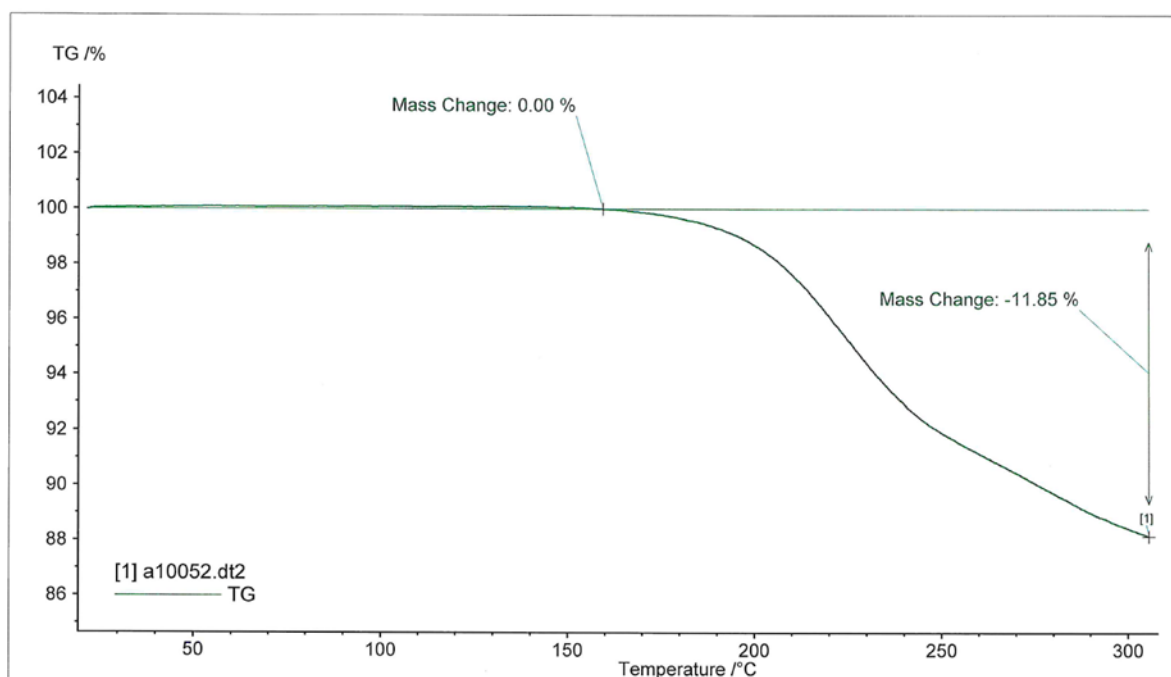

Figure S17. TG-FTIR thermogram of PSZ-MLA, collected with a heating rate of 10 K/min.

### 5.3 Raman Spectrum

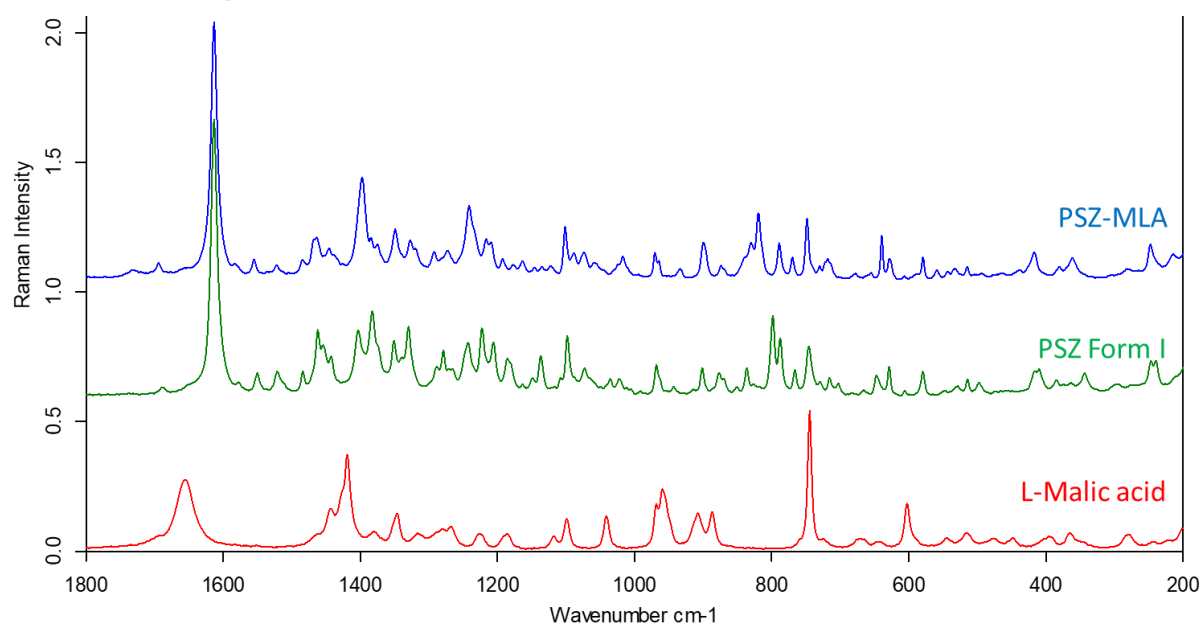

Figure S18. FT-Raman spectra of PSZ Form I, L-malic acid and PSZ-MLA.

### 5.4 Powder X-ray Diffraction Patterns

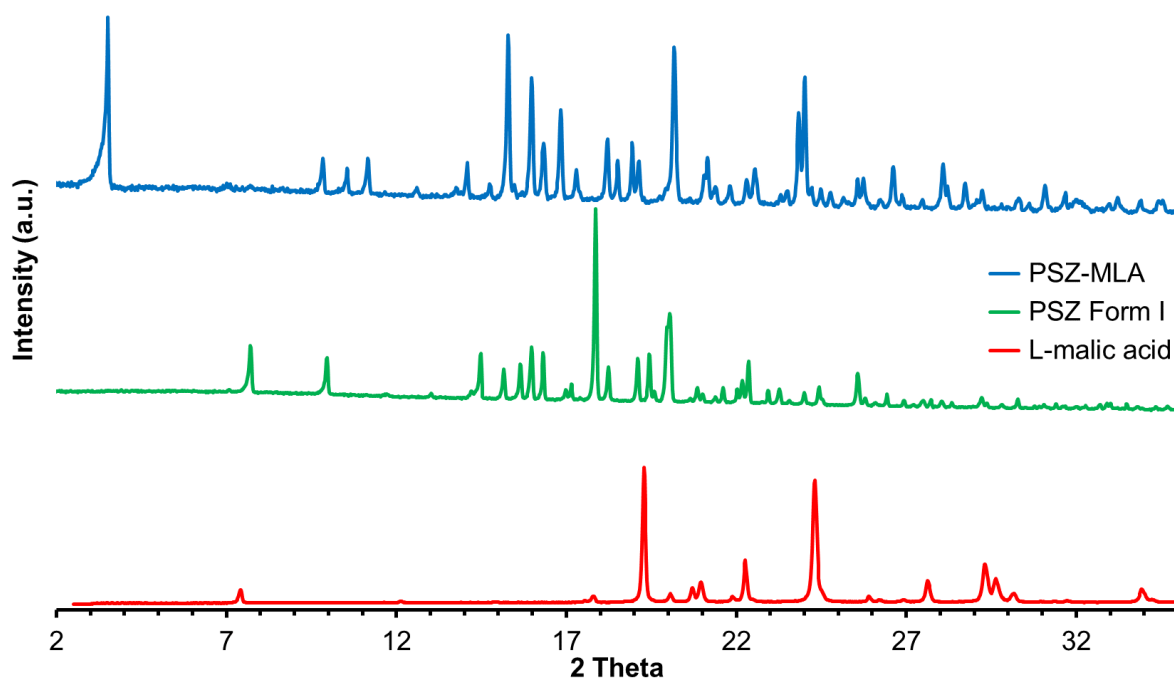

Figure S19. PXRD patterns of PSZ Form I, L-malic acid and PSZ-MLA.

## 5.5 Proton Nuclear Magnetic Resonance ( $^1\text{H-NMR}$ )

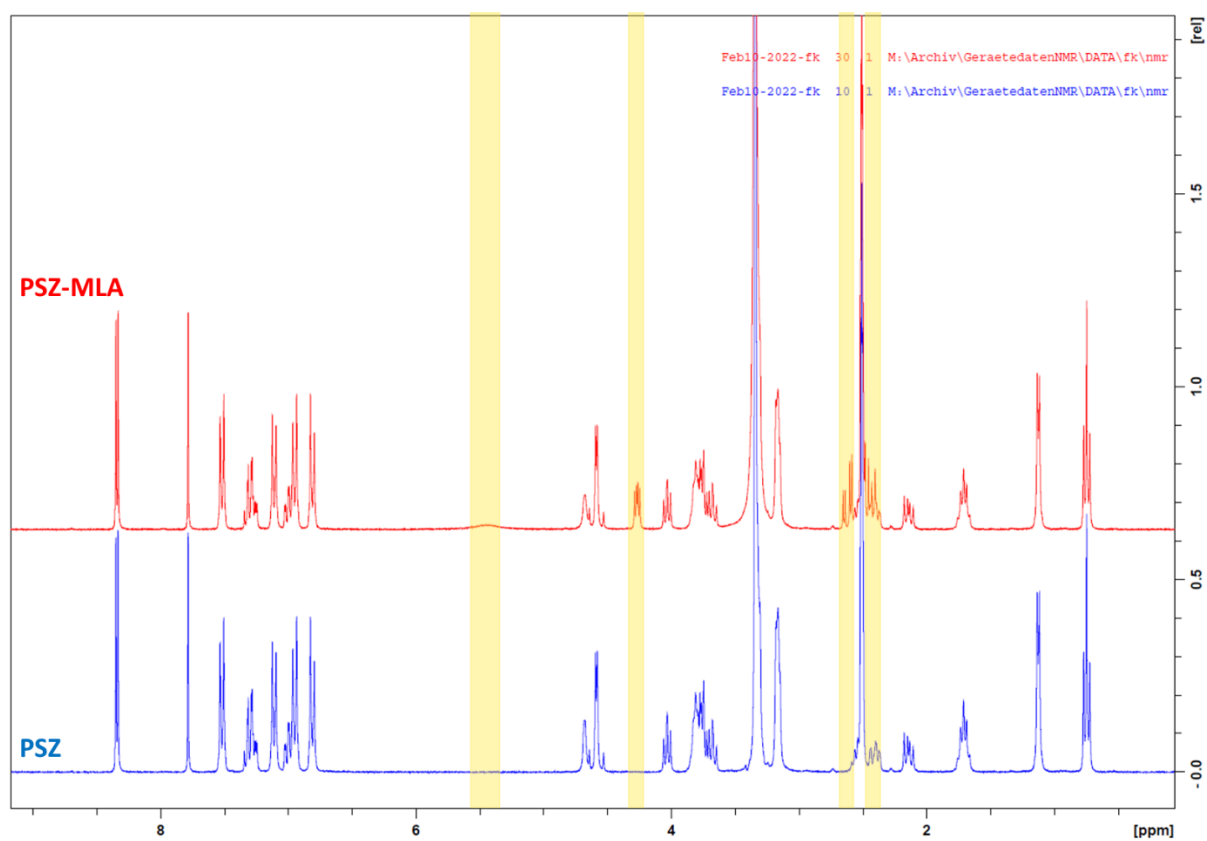

**Figure S20.** Proton NMR spectra of PSZ-MLA and PSZ in deuterated DMSO; chemical shifts reported in ppm. The peaks of the cofomer are highlighted in yellow.

## 6 Posaconazole – Citric Acid Cocystal (PSZ-CIT)

### 6.1 DSC

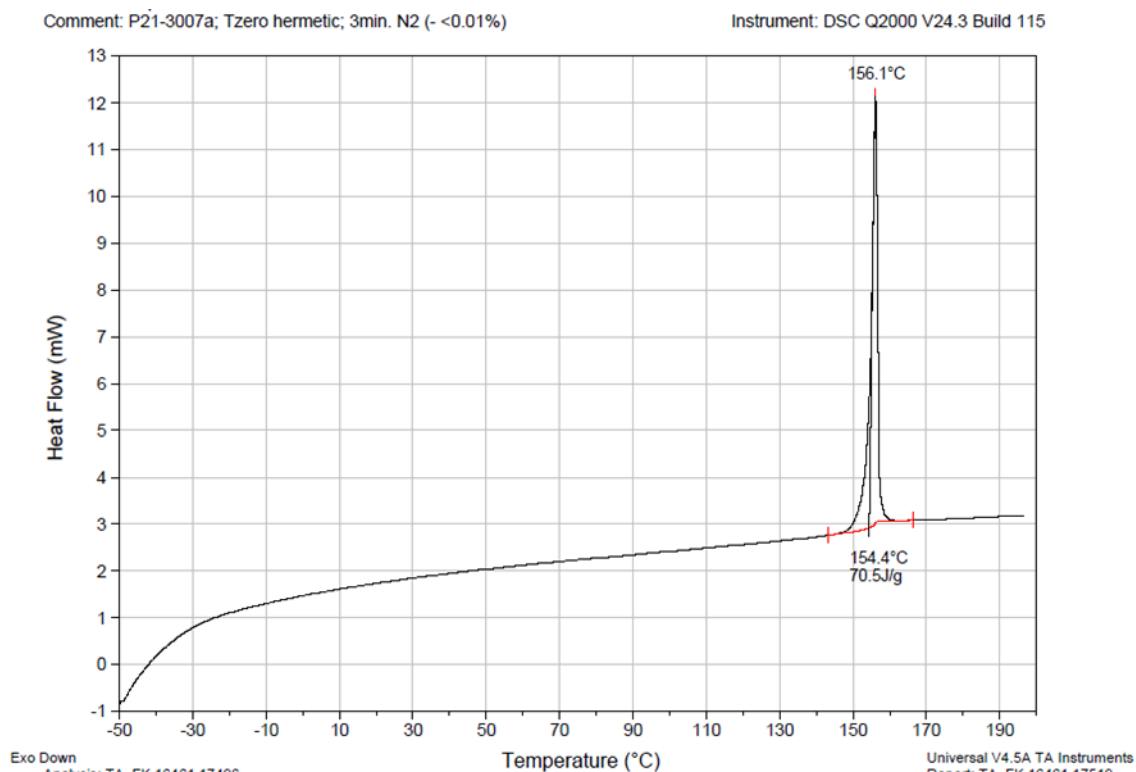

Figure S21. DSC thermogram of PSZ-CIT, collected with a heating rate of 10 K/min.

### 6.2 TG-FTIR

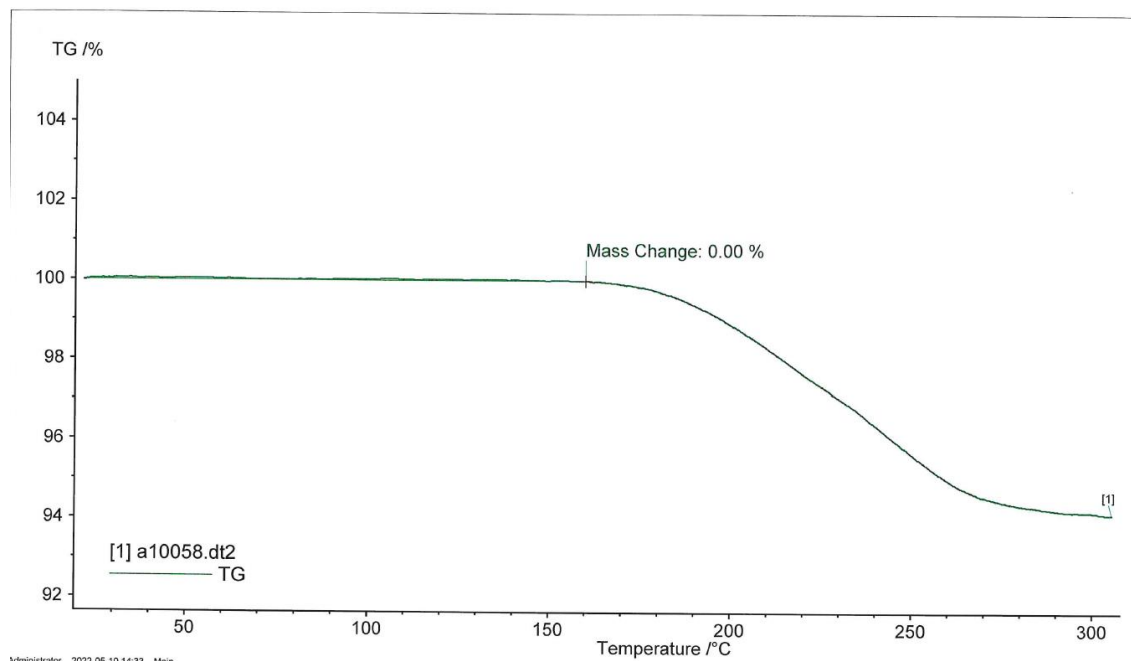

Figure S22. TG-FTIR thermogram of PSZ-CIT, collected with a heating rate of 10 K/min.



### 6.3 Raman Spectrum

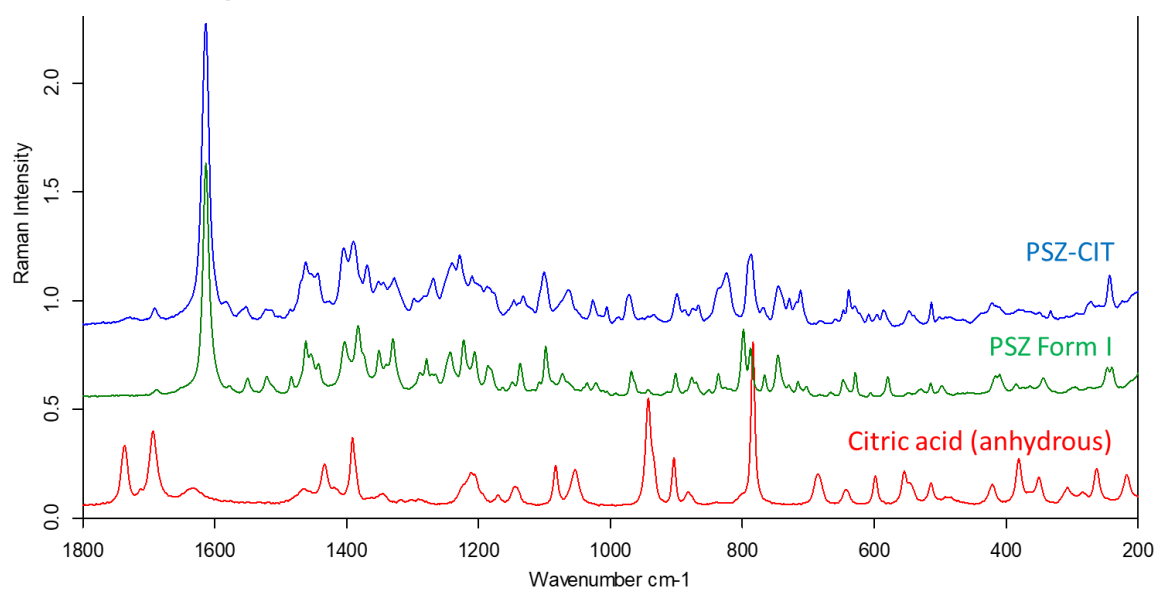

Figure S23. FT-Raman spectra of PSZ Form I, citric acid and PSZ-CIT.

### 6.4 Powder X-ray Diffraction Patterns

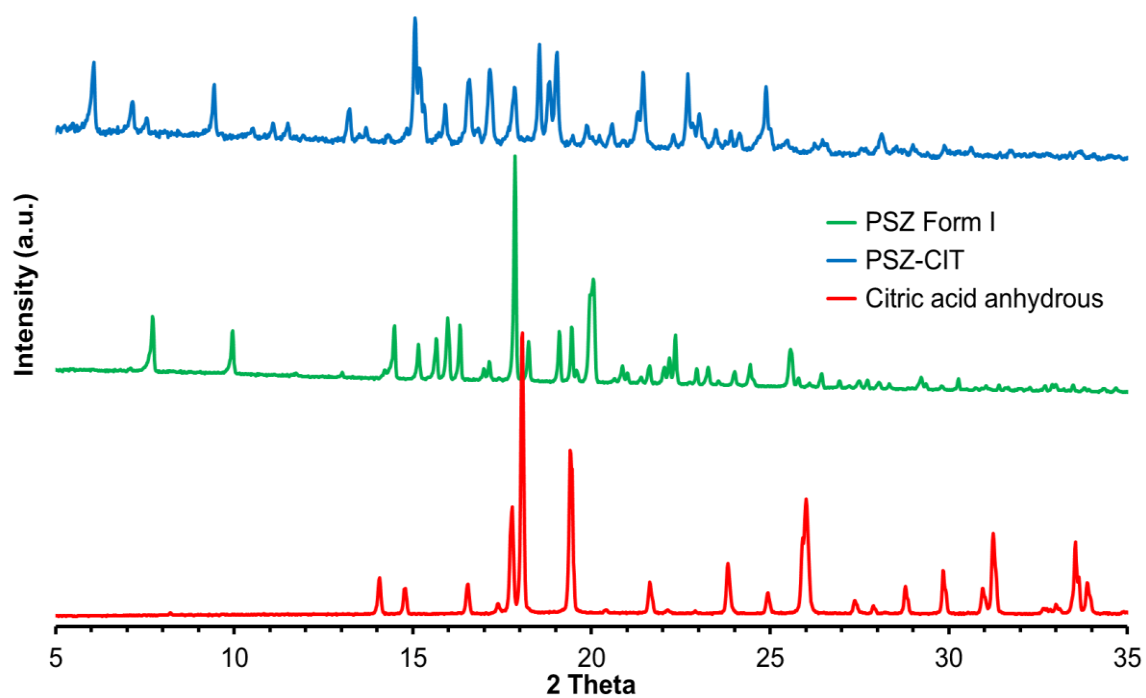

Figure S24. PXRD patterns of PSZ Form I, citric acid and PSZ-CIT.

## 6.5 Proton Nuclear Magnetic Resonance ( $^1\text{H-NMR}$ )

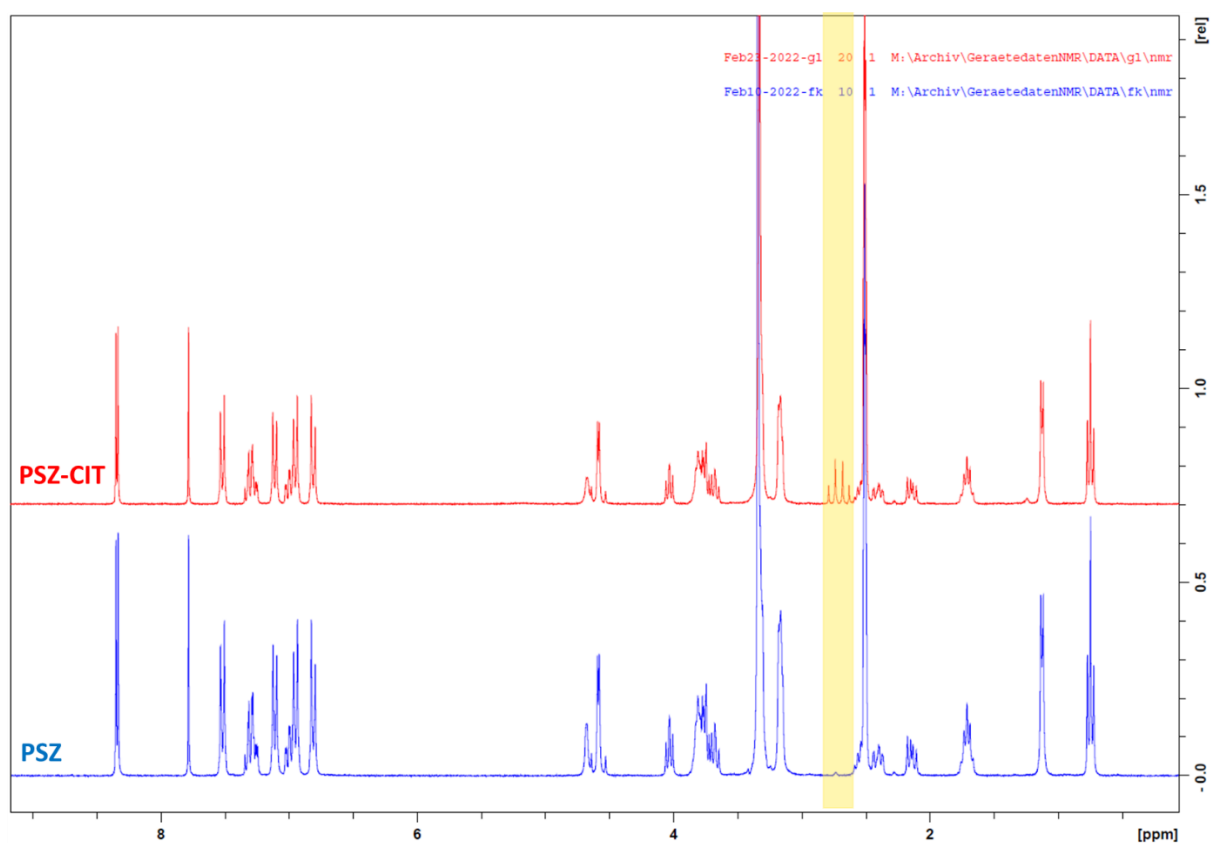

**Figure S25.** Proton NMR spectra of PSZ-CIT and PSZ collected in deuterated DMSO; chemical shifts reported in ppm. The peaks of the coformer are highlighted in yellow.

## 7 Posaconazole – 1-Hydroxy-2-Naphthoic Acid Cocrystal (PSZ-XIN)

### 7.1 DSC

Comment: P21-3007a; Tzero hermetic; 3min. N2 (- <0.01%)

Instrument: DSC Q2000 V24.3 Build 115

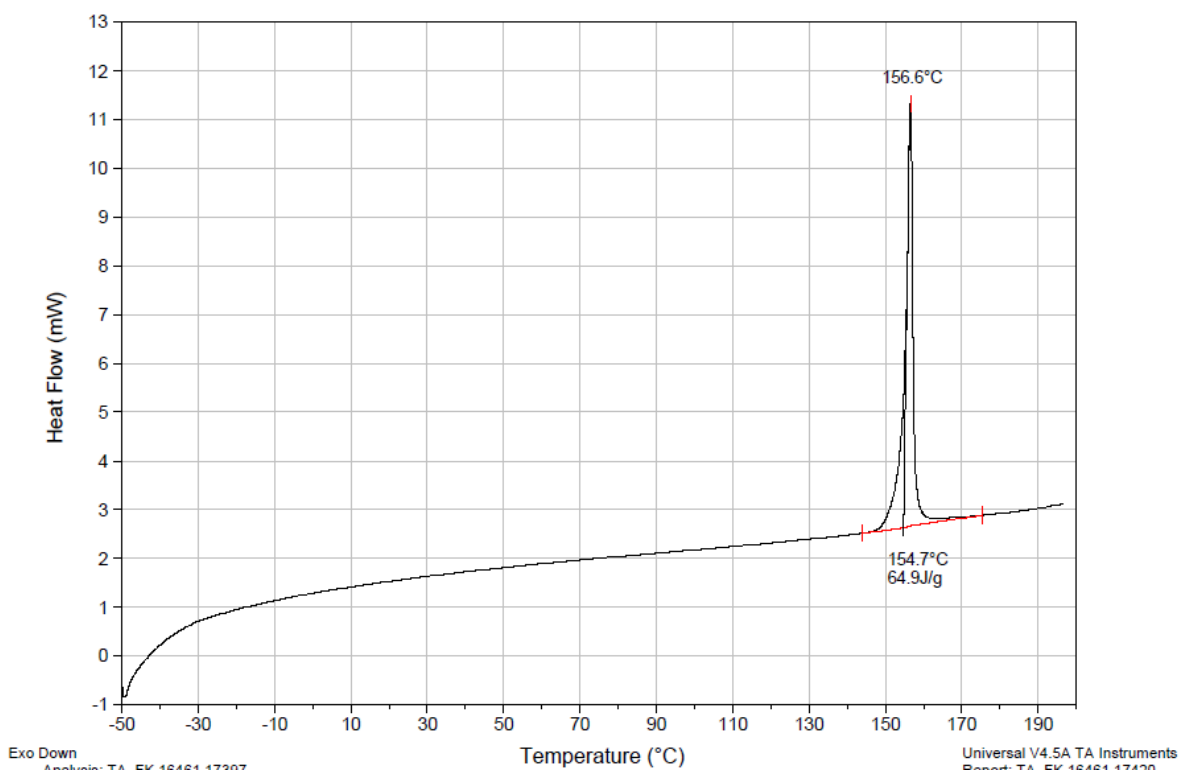

Figure S26. DSC thermogram of PSZ-XIN, collected with a heating rate of 10 K/min.

### 7.2 TG-FTIR

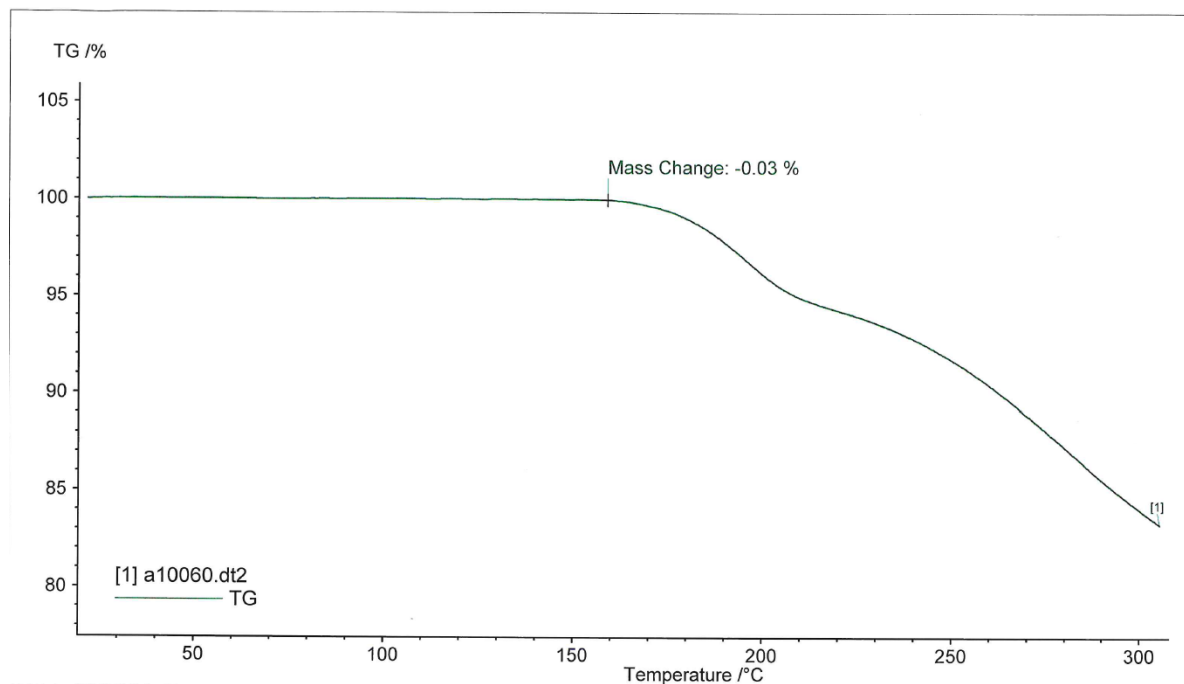

Figure S27. TG-FTIR thermogram of PSZ-XIN, collected with a heating rate of 10 K/min.

### 7.3 Raman Spectrum

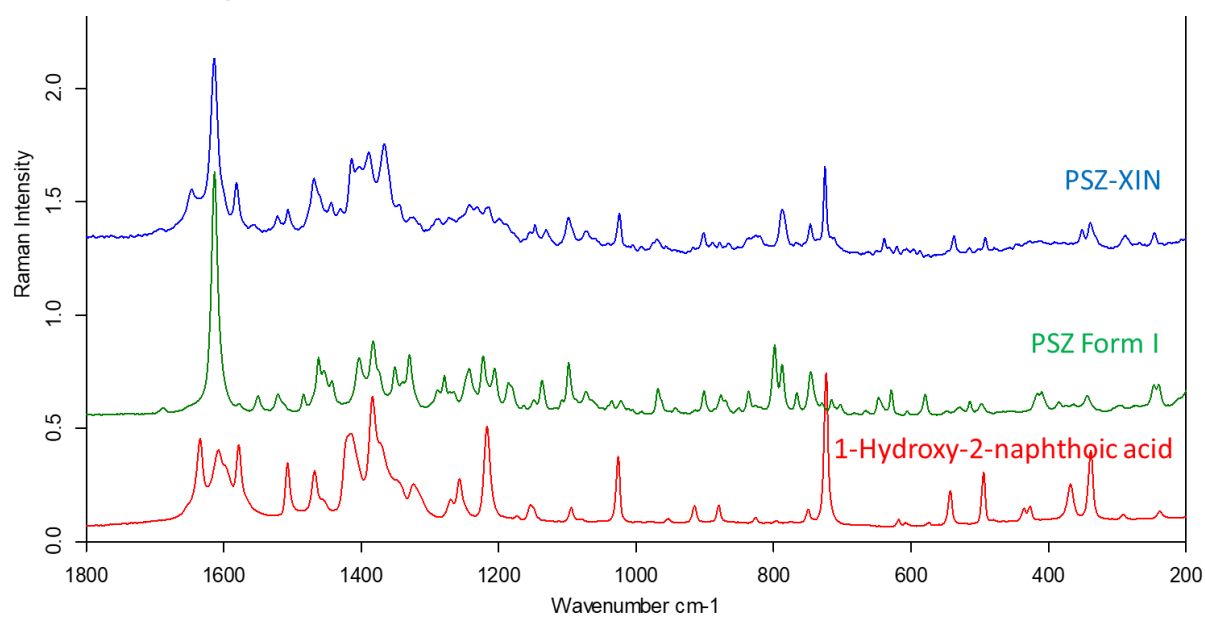

Figure S28. FT-Raman spectra of PSZ form I, 1-hydroxy-2-naphthoic acid and PSZ-XIN.

### 7.4 Powder X-ray Diffraction Patterns

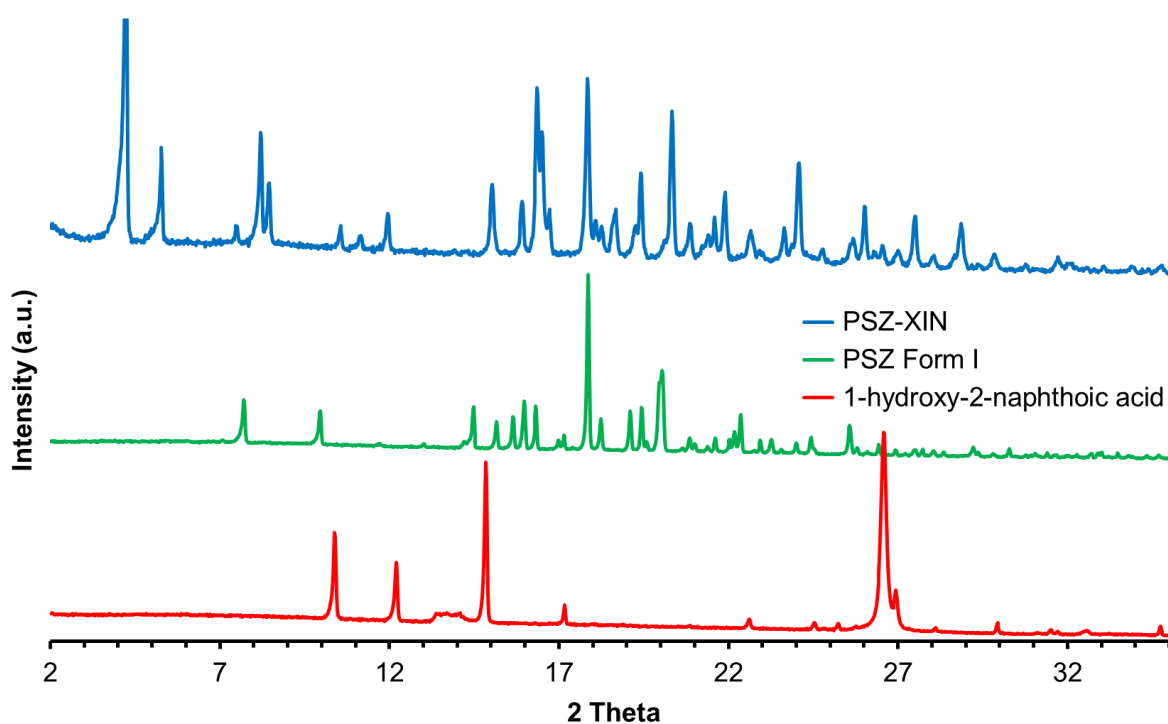

Figure S29. PXRD patterns of PSZ Form I, 1-hydroxy-2-naphthoic acid and PSZ-XIN.

## 7.5 Proton Nuclear Magnetic Resonance ( $^1\text{H-NMR}$ )

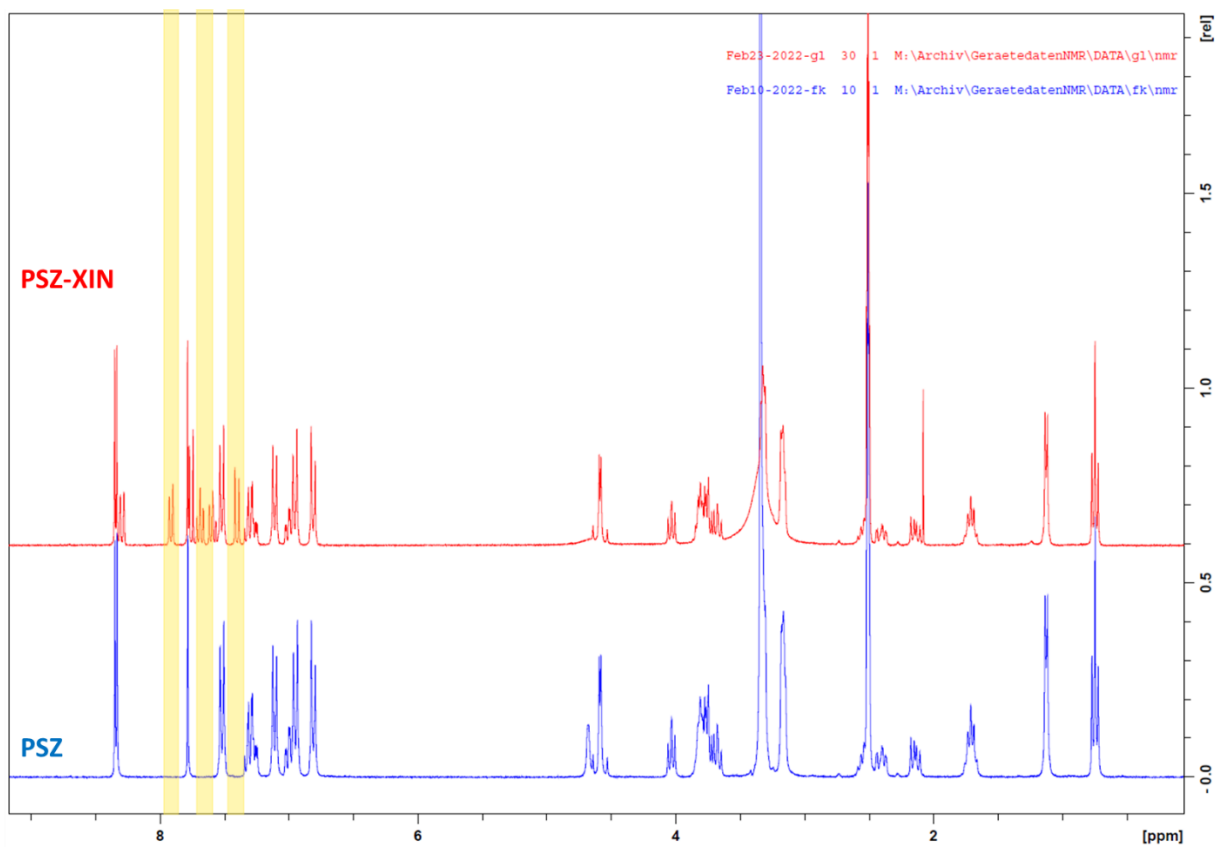

**Figure S30.** Proton NMR spectra of PSZ-XIN and PSZ collected in deuterated DMSO; chemical shifts reported in ppm. The peaks of the cofomer are highlighted in yellow.

## 8 Posaconazole – Gentisic Acid Cocrystal (PSZ-GEN)

### 8.1 DSC

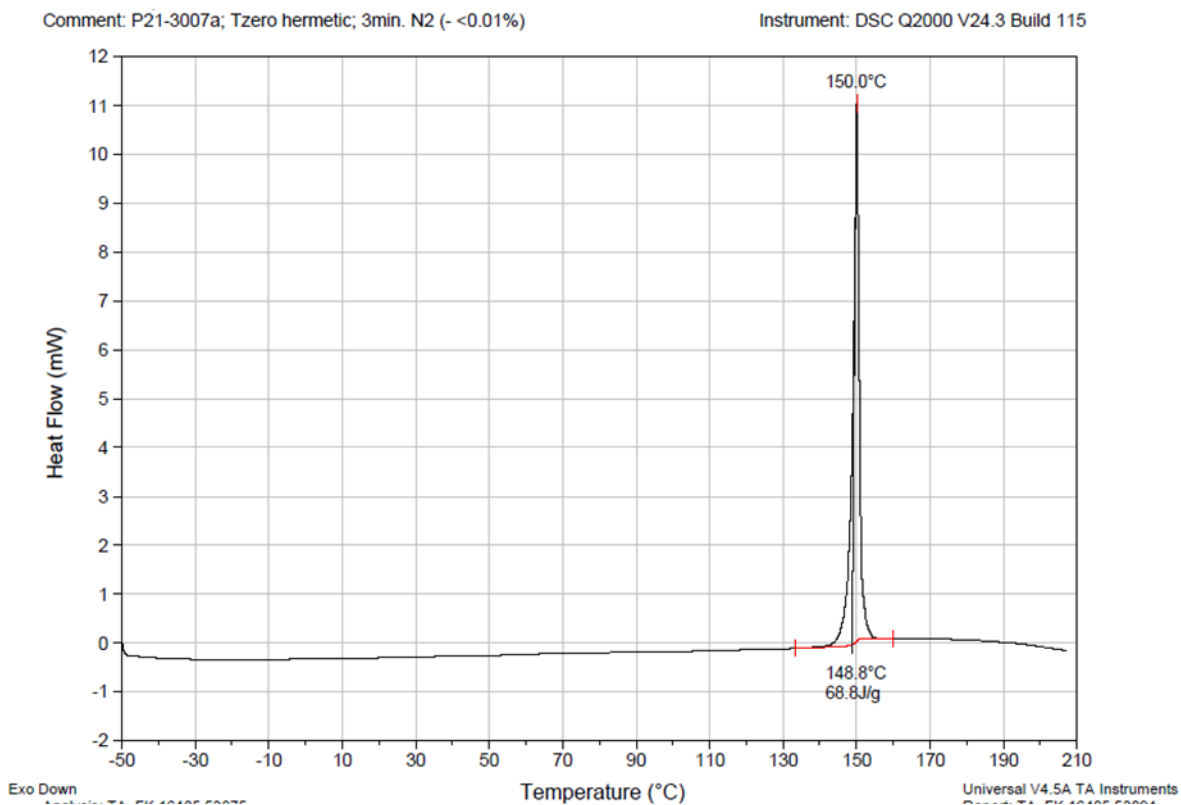

Figure S31. DSC thermogram of PSZ-GEN, collected with a heating rate of 10 K/min.

### 8.2 TG-FTIR

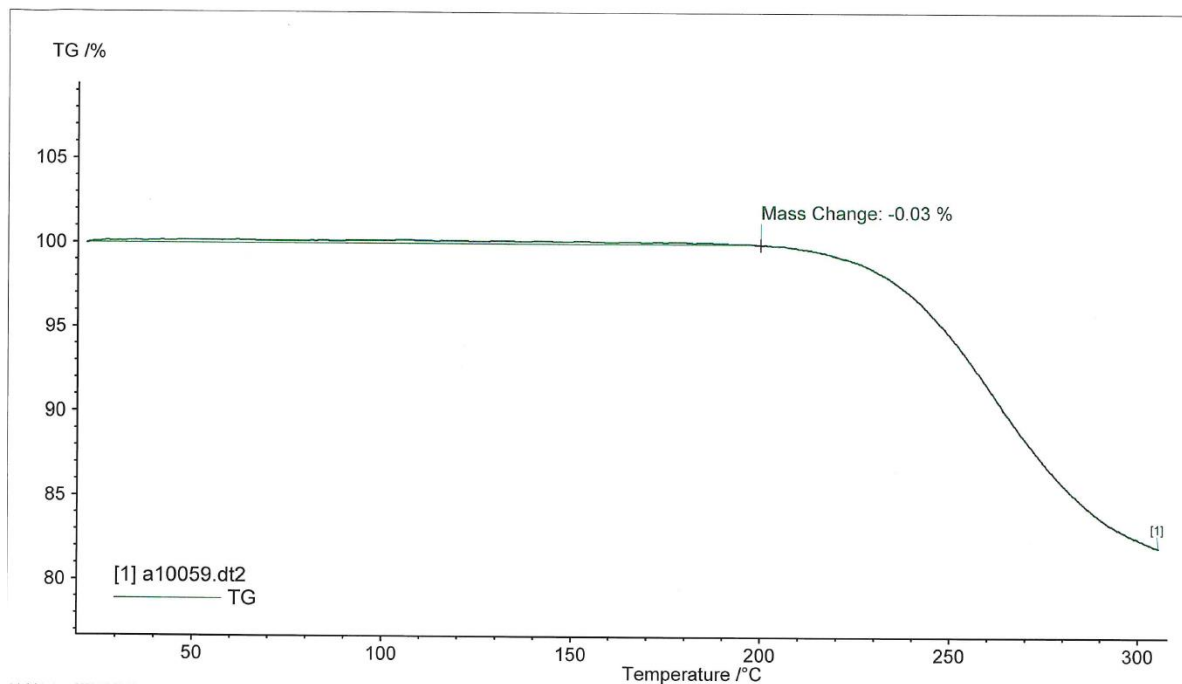

Figure S32. TG-FTIR thermogram of PSZ-GEN, collected with a heating rate of 10 K/min.

### 8.3 Raman Spectrum

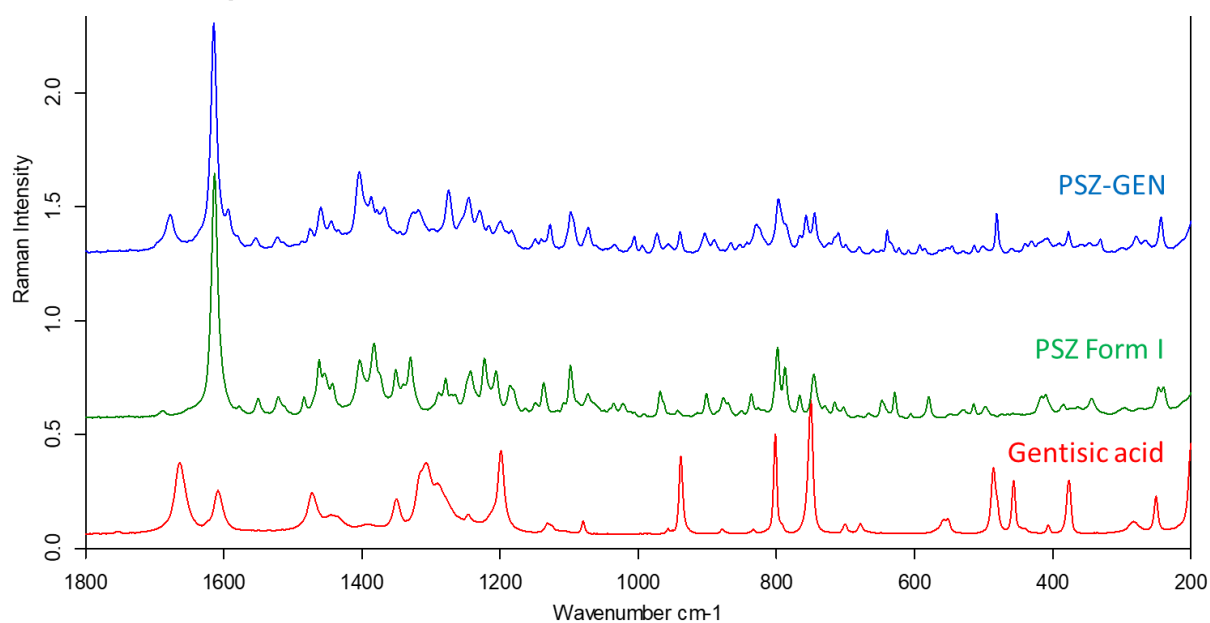

Figure S33. FT-Raman spectra of PSZ Form I, gentisic acid and PSZ-GEN.

### 8.4 Powder X-ray Diffraction Patterns

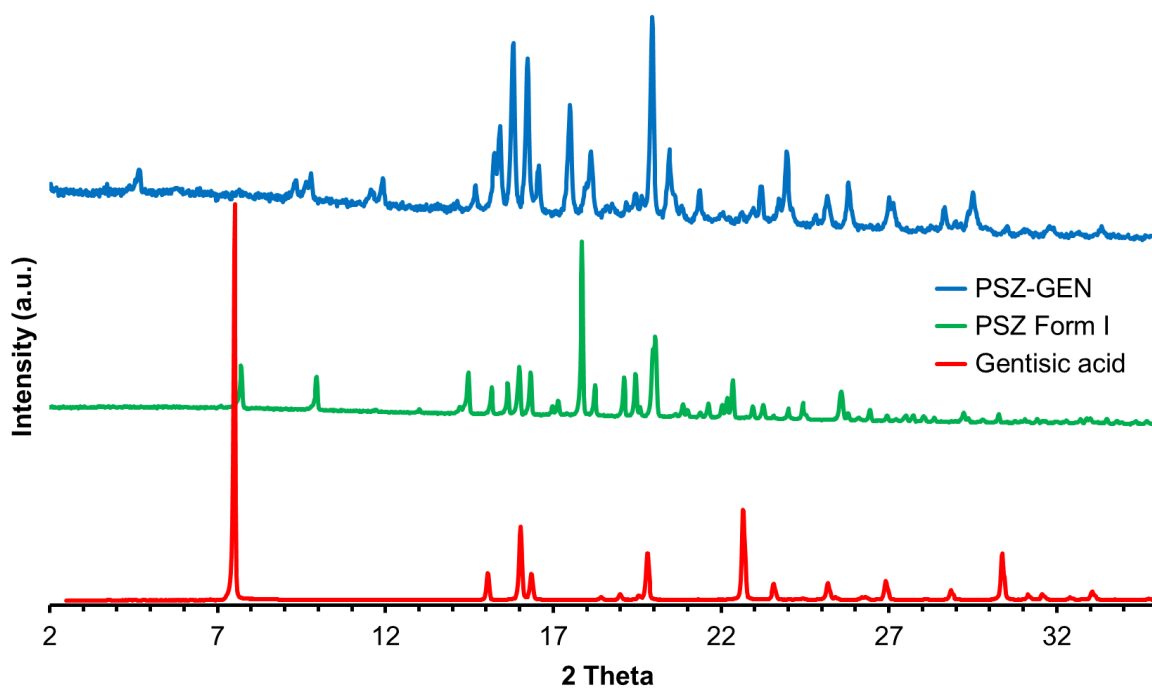

Figure S34. PXRD patterns of PSZ Form I, gentisic acid and PSZ-GEN.

## 8.5 Proton Nuclear Magnetic Resonance ( $^1\text{H-NMR}$ )

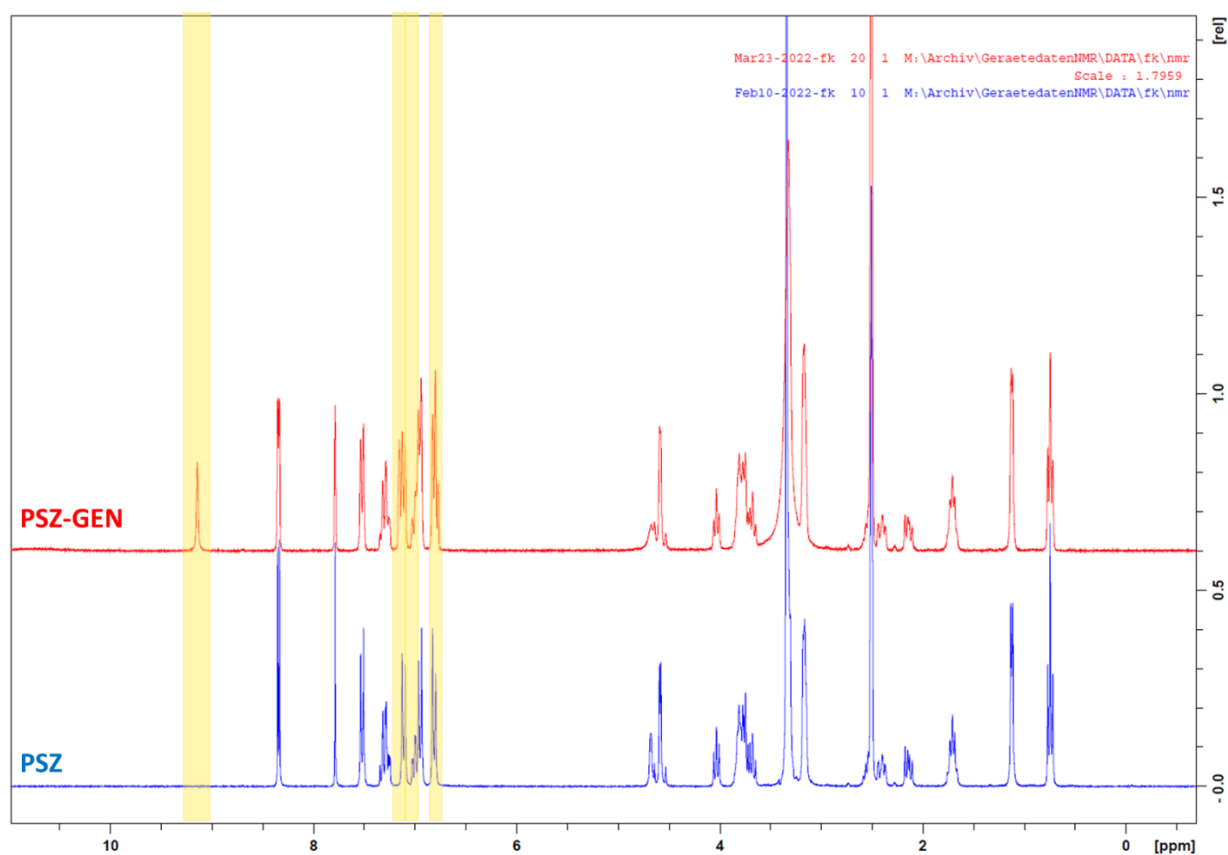

**Figure S35.** Proton NMR spectra of PSZ-GEN and PSZ collected in deuterated DMSO; chemical shifts reported in ppm. The peaks of the coformer are highlighted in yellow.



## 9 Posaconazole – Salicylic Acid Cocrystal (PSZ-SAL)

### 9.1 DSC

Sample Size: 1.238 mg  
Note: P21-3007a; Tzero hermetic; 3min. N2; (<0.01%)

Instrument: DSC2500 (DSC24-1428)  
Run date: 25.08.2022 11:13:35

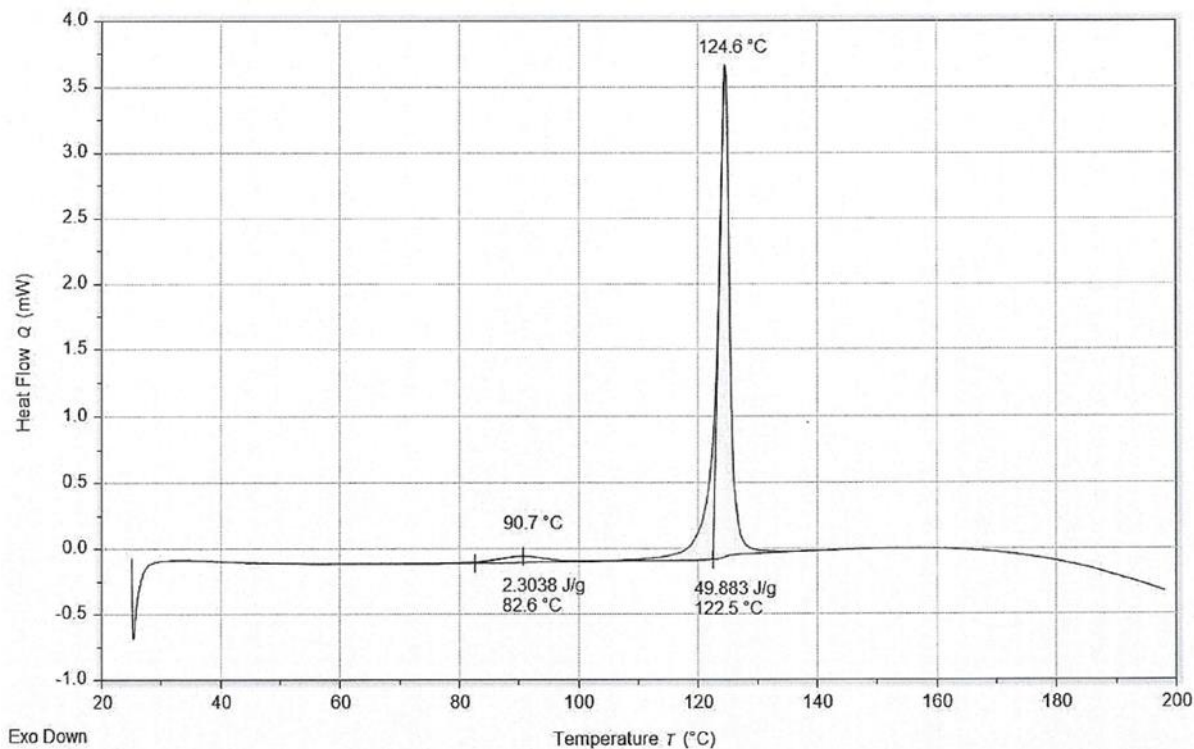

Figure S36. DSC thermogram of PSZ-SAL, collected with a heating rate of 10 K/min.

### 9.2 TG-FTIR

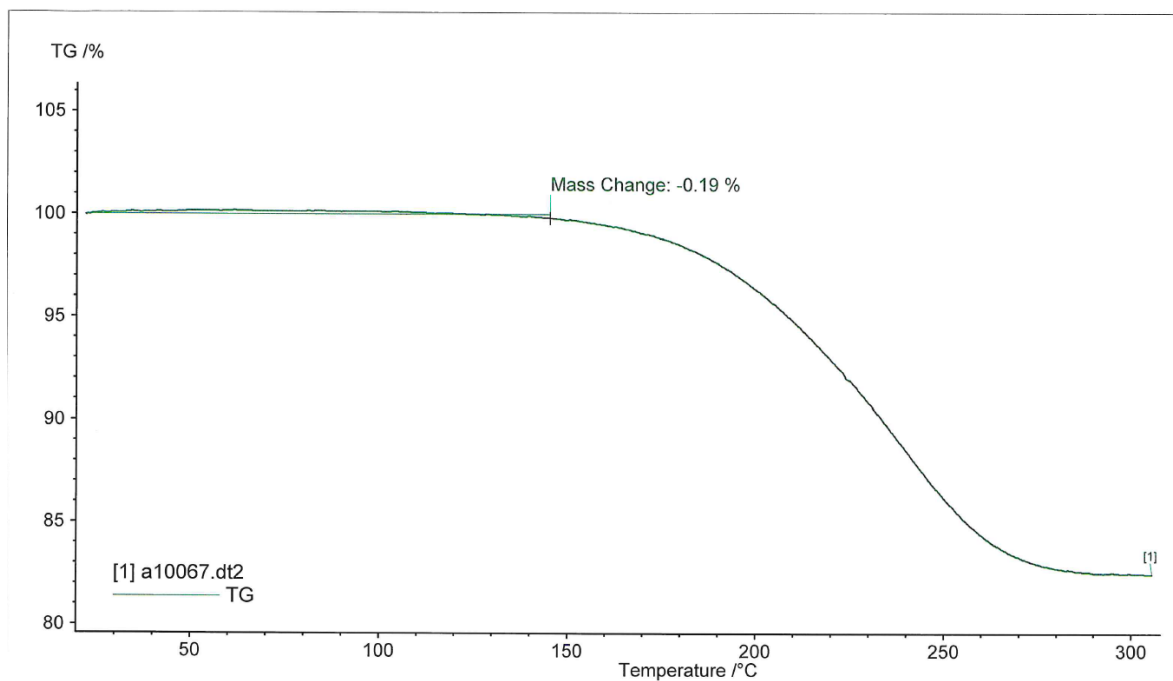

Figure S37. TG-FTIR thermogram of PSZ-SAL, collected with a heating rate of 10 K/min.

### 9.3 Raman Spectrum

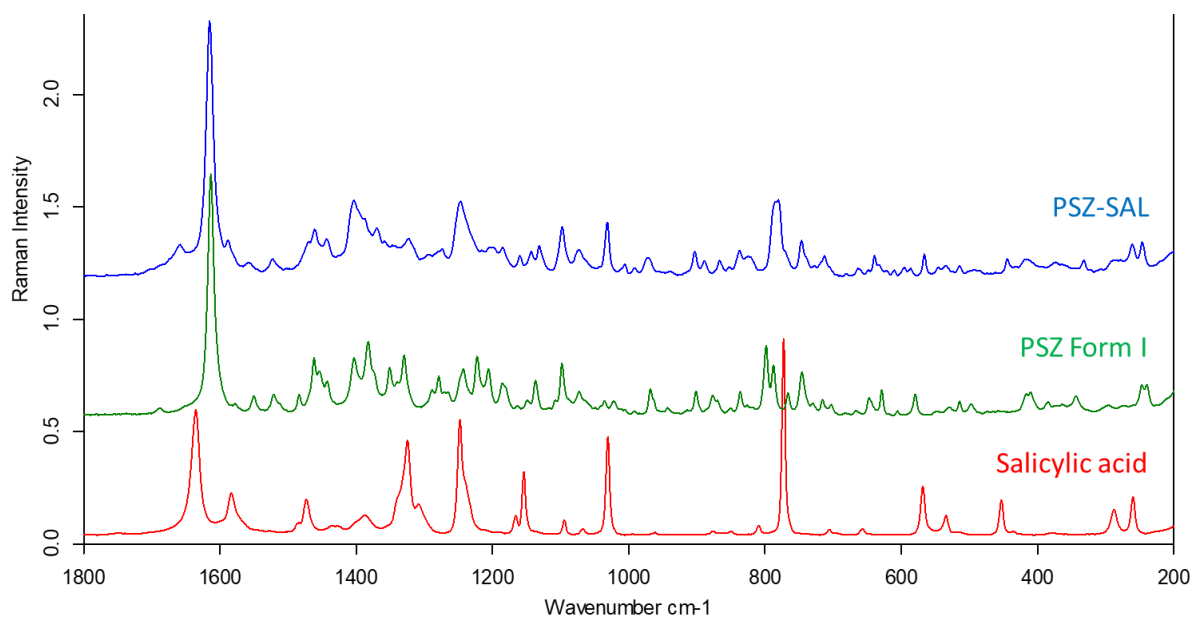

Figure S38. FT-Raman spectra of PSZ Form I, salicylic acid and PSZ-SAL.

### 9.4 Powder X-ray Diffraction Patterns

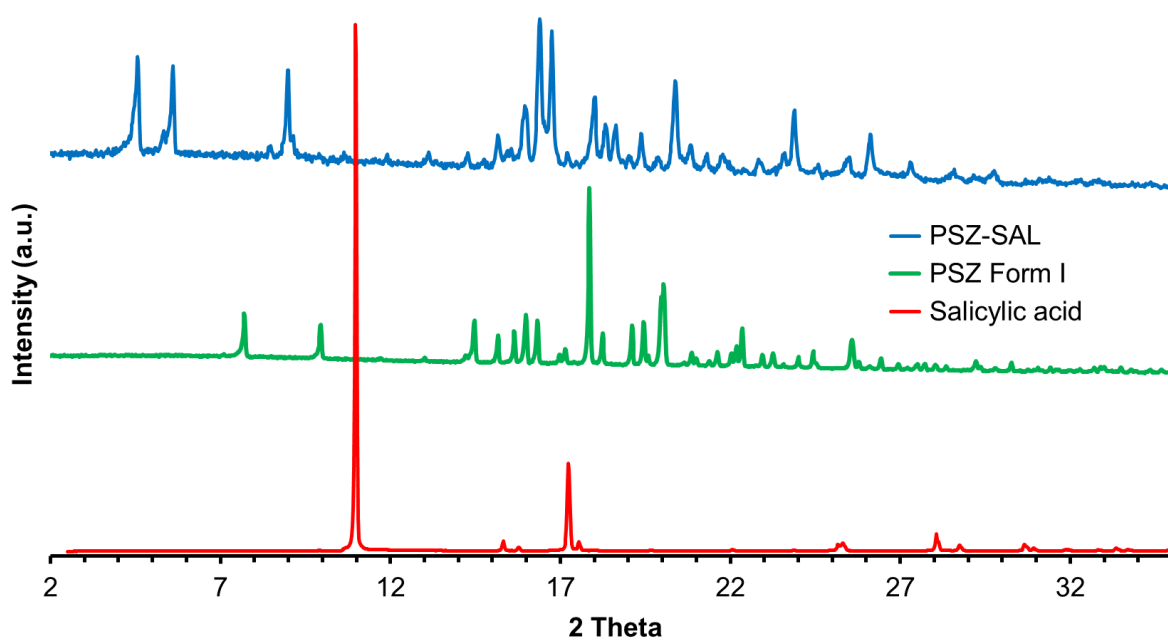

Figure S39. PXRD patterns of PSZ Form I, salicylic acid and PSZ-SAL.

## 9.5 Proton Nuclear Magnetic Resonance ( $^1\text{H-NMR}$ )

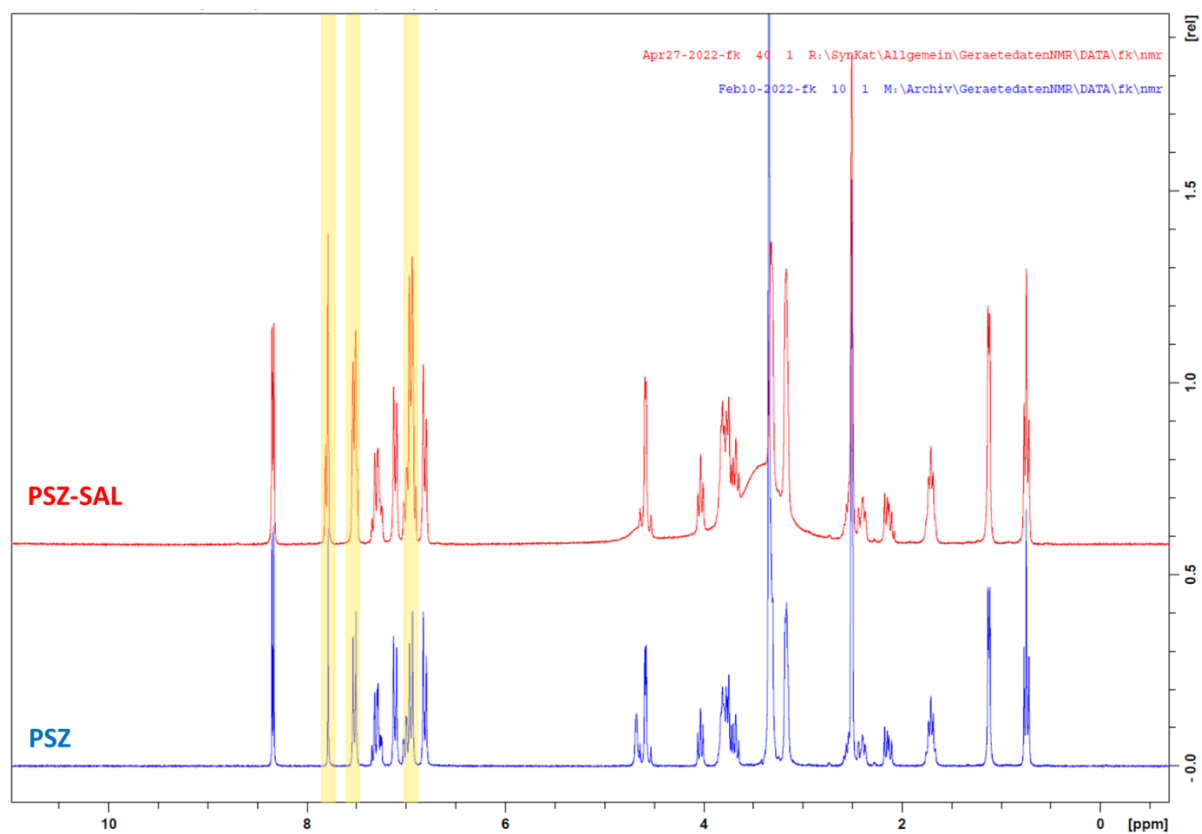

**Figure S40.** Proton NMR spectra of PSZ-SAL and PSZ collected in deuterated DMSO, chemical shifts reported in ppm. The peaks of the coformer are highlighted in yellow.

## 10 Posaconazole – 4-Aminobenzoic Acid Cocrystal (PSZ-ABA)

### 10.1 DSC

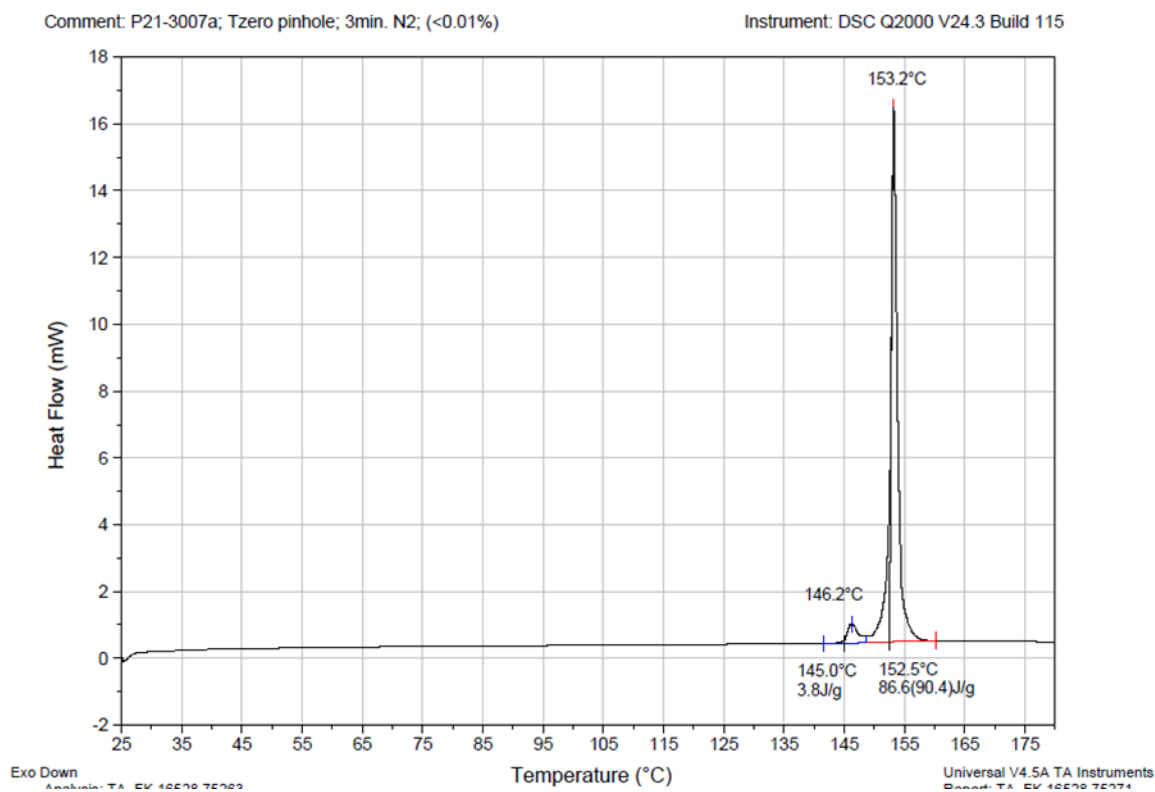

Figure S41. DSC thermogram of PSZ-ABA, collected with a heating rate of 10 K/min.

### 10.2 TG-FTIR

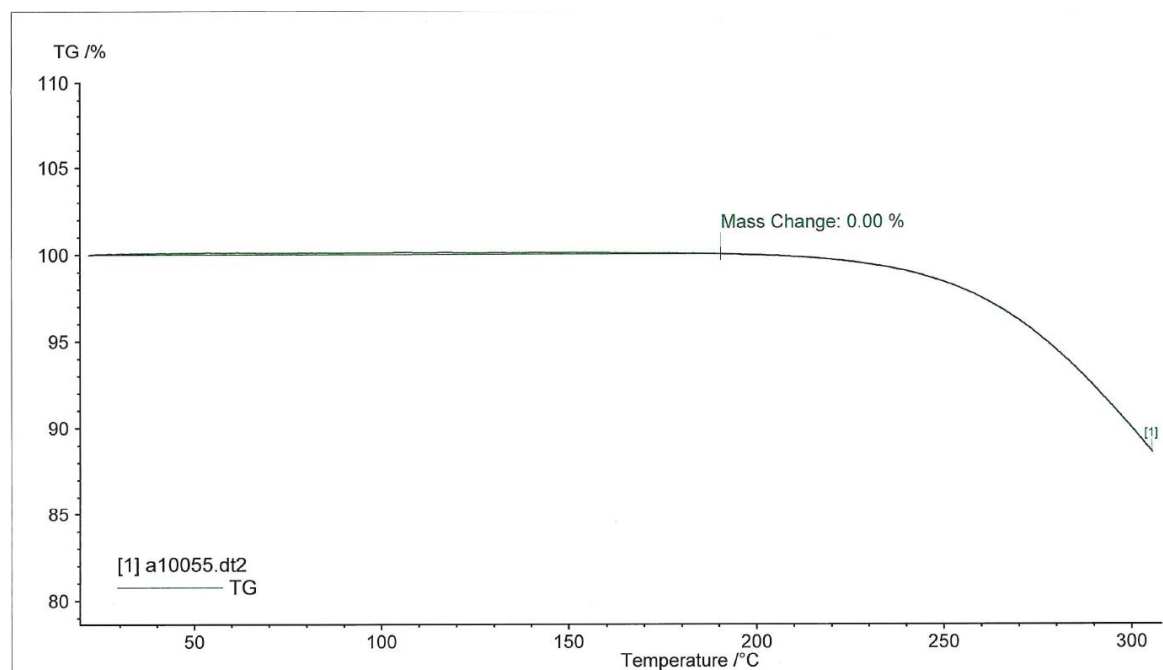

Figure S42. TG-FTIR thermogram of PSZ-ABA, collected with a heating rate of 10 K/min.

### 10.3 Raman Spectrum

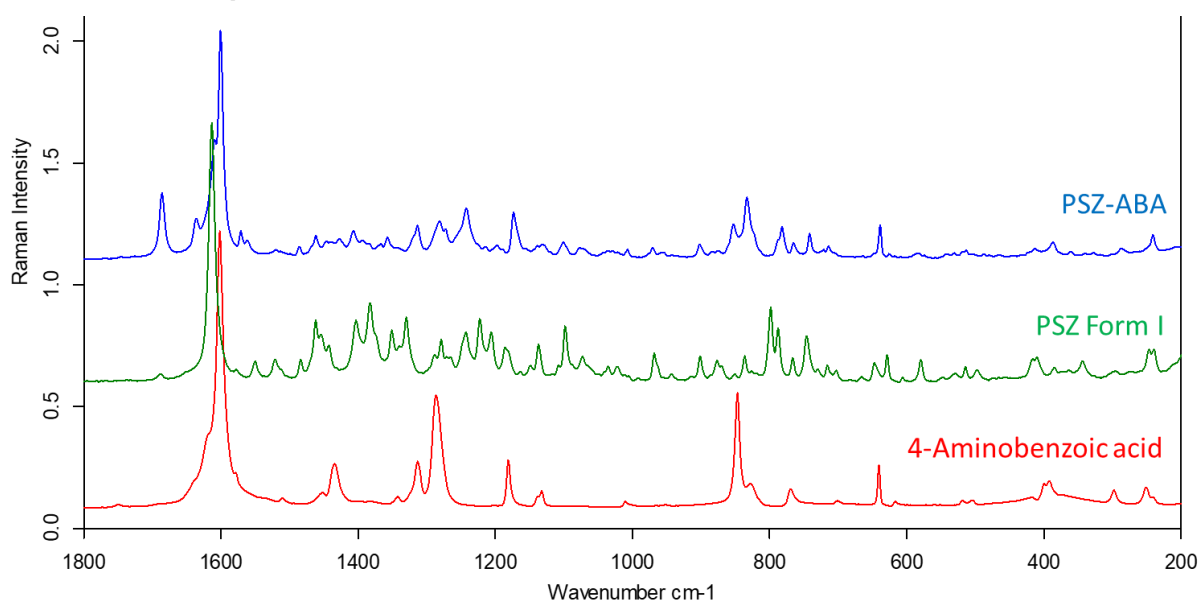

Figure S43. FT-Raman spectra of PSZ Form I, 4-aminobenzoic acid and PSZ-ABA.

### 10.4 Powder X-ray Diffraction Patterns

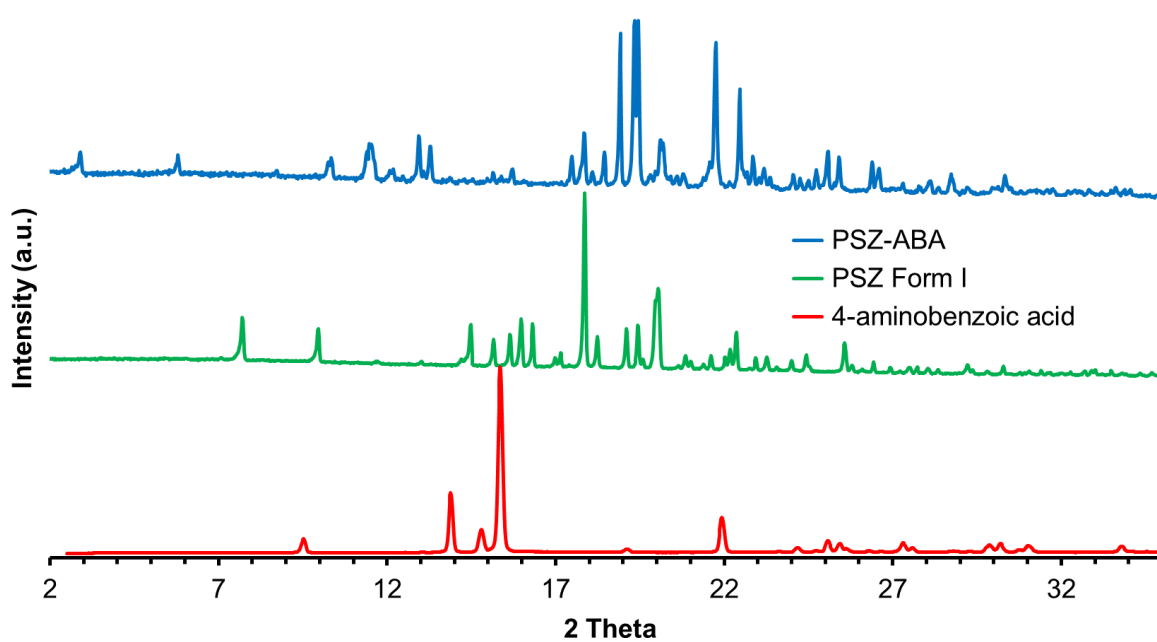

Figure S44. PXRD patterns of PSZ Form I, 4-aminobenzoic acid and PSZ-ABA.

## 10.5 Proton Nuclear Magnetic Resonance ( $^1\text{H-NMR}$ )

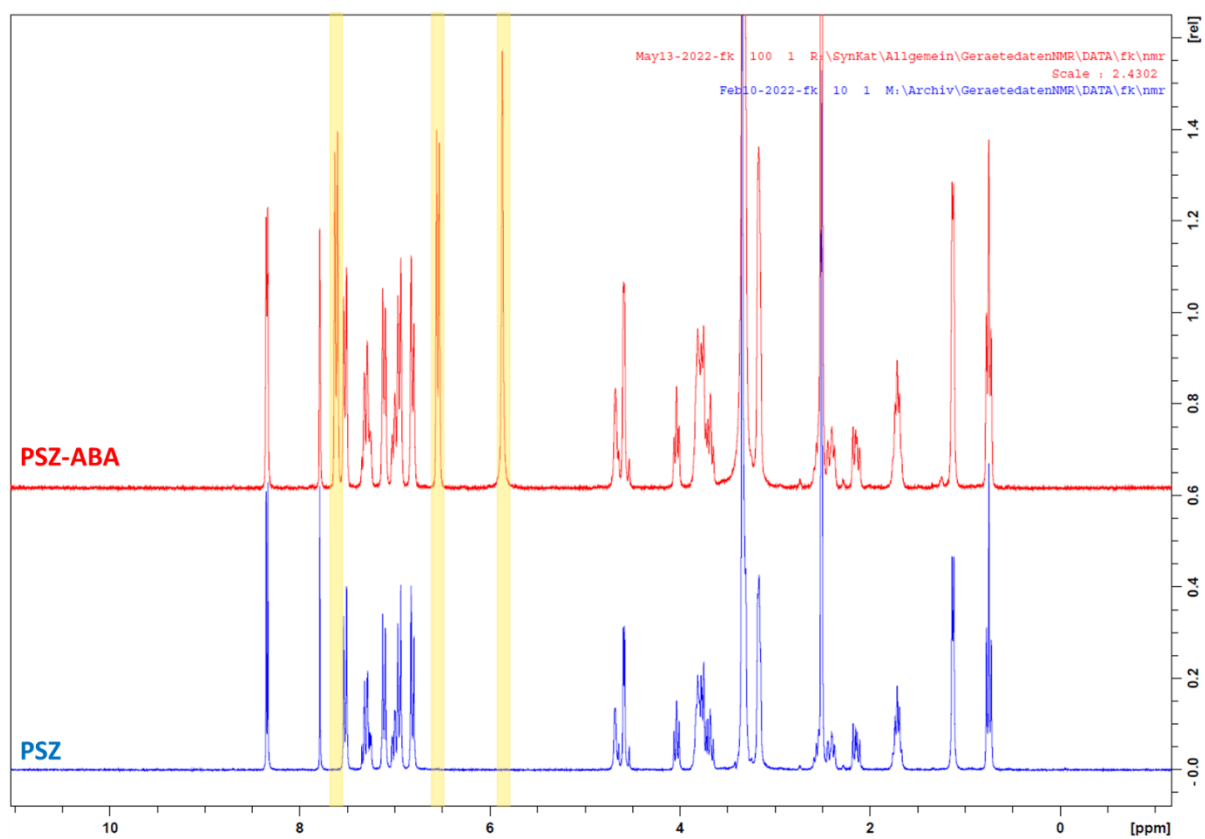

**Figure S45.** Proton NMR spectra of PSZ-ABA and PSZ collected in deuterated DMSO; chemical shifts reported in ppm. The peaks of the coformer are highlighted in yellow.

# 11 Posaconazole – L-Lactic Acid Cocystal (PSZ-LLA)

## 11.1 DSC

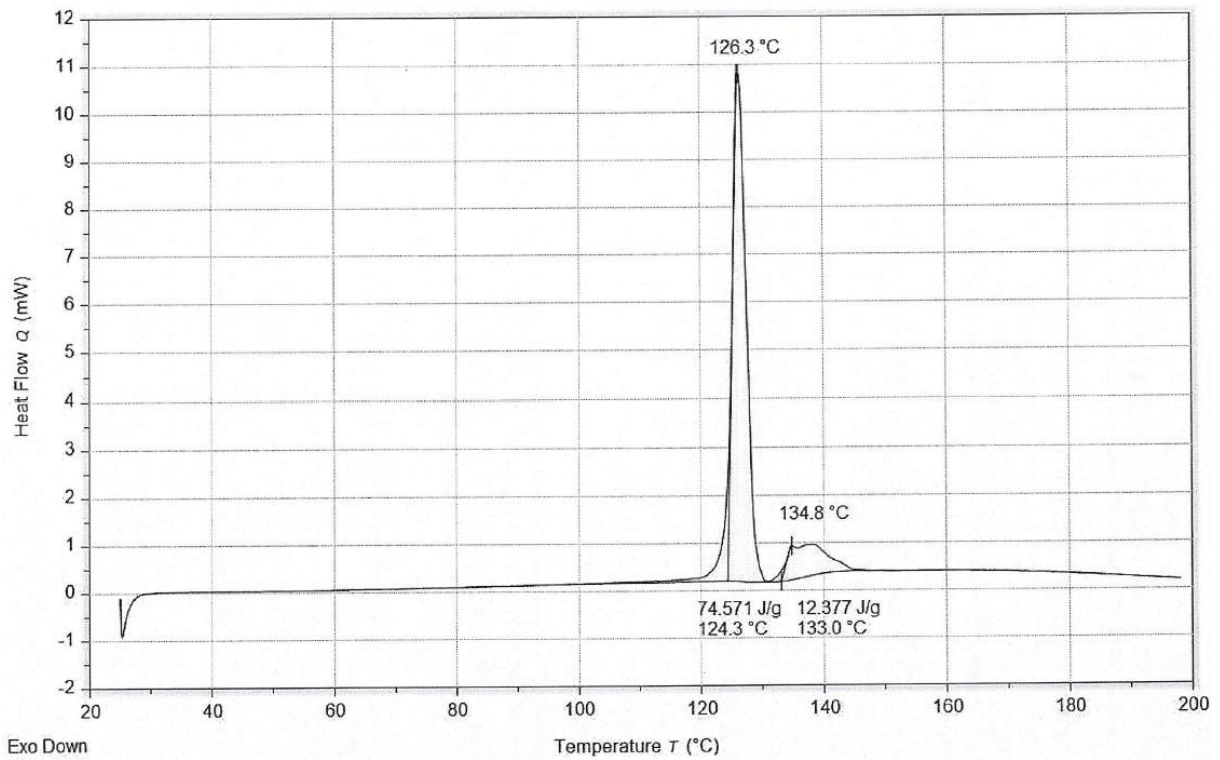

Figure S46. DSC thermogram of PSZ-LLA, collected with a heating rate of 10 K/min.

## 11.2 TG-FTIR

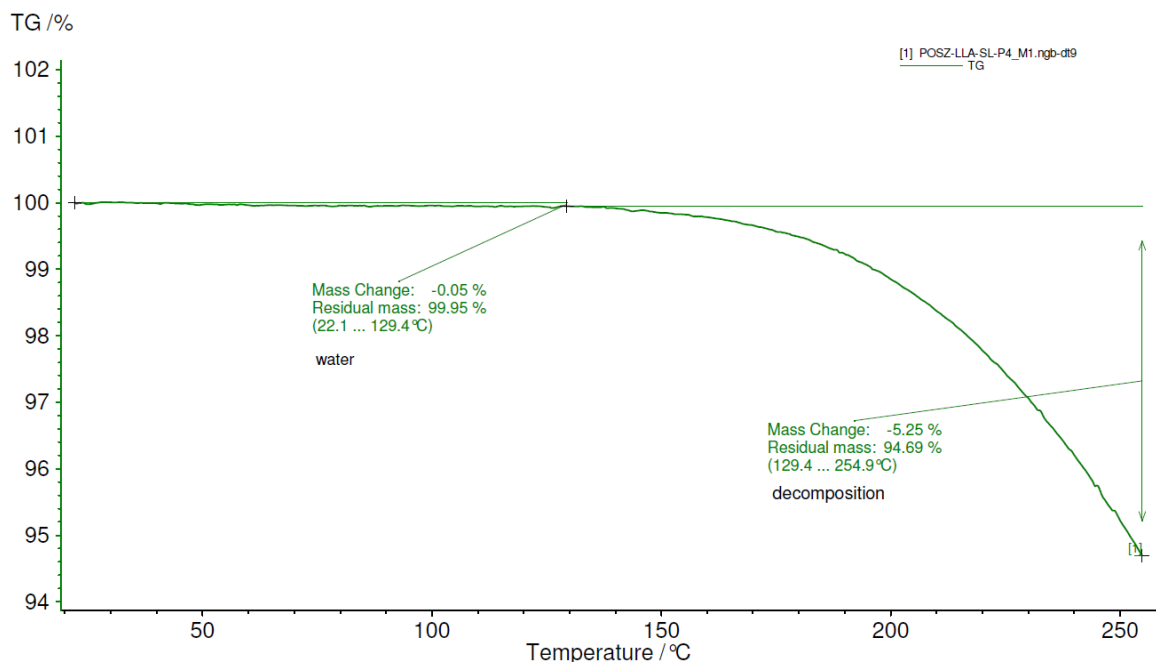

Figure S47. TG-FTIR thermogram of PSZ-LLA, collected with a heating rate of 10 K/min.

### 11.3 Raman Spectrum

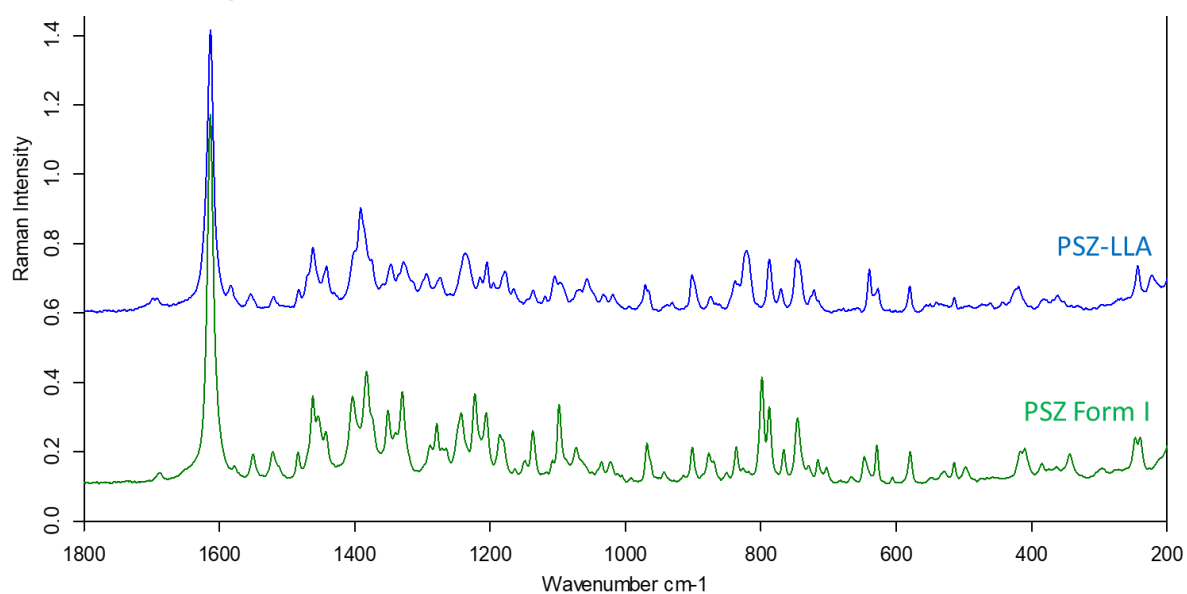

Figure S48. FT-Raman spectra of PSZ Form I and PSZ-LLA.

### 11.4 Powder X-ray Diffraction Patterns

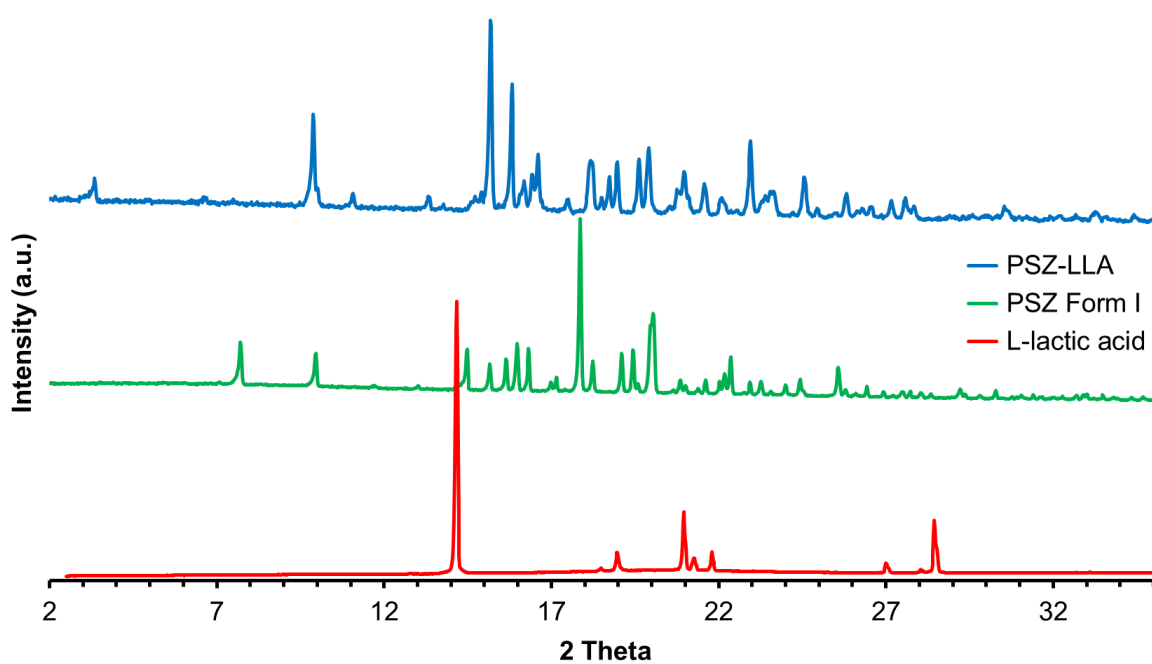

Figure S49. PXRD patterns of PSZ Form I, L-lactic acid and PSZ-LLA.



## 11.5 Proton Nuclear Magnetic Resonance ( $^1\text{H-NMR}$ )

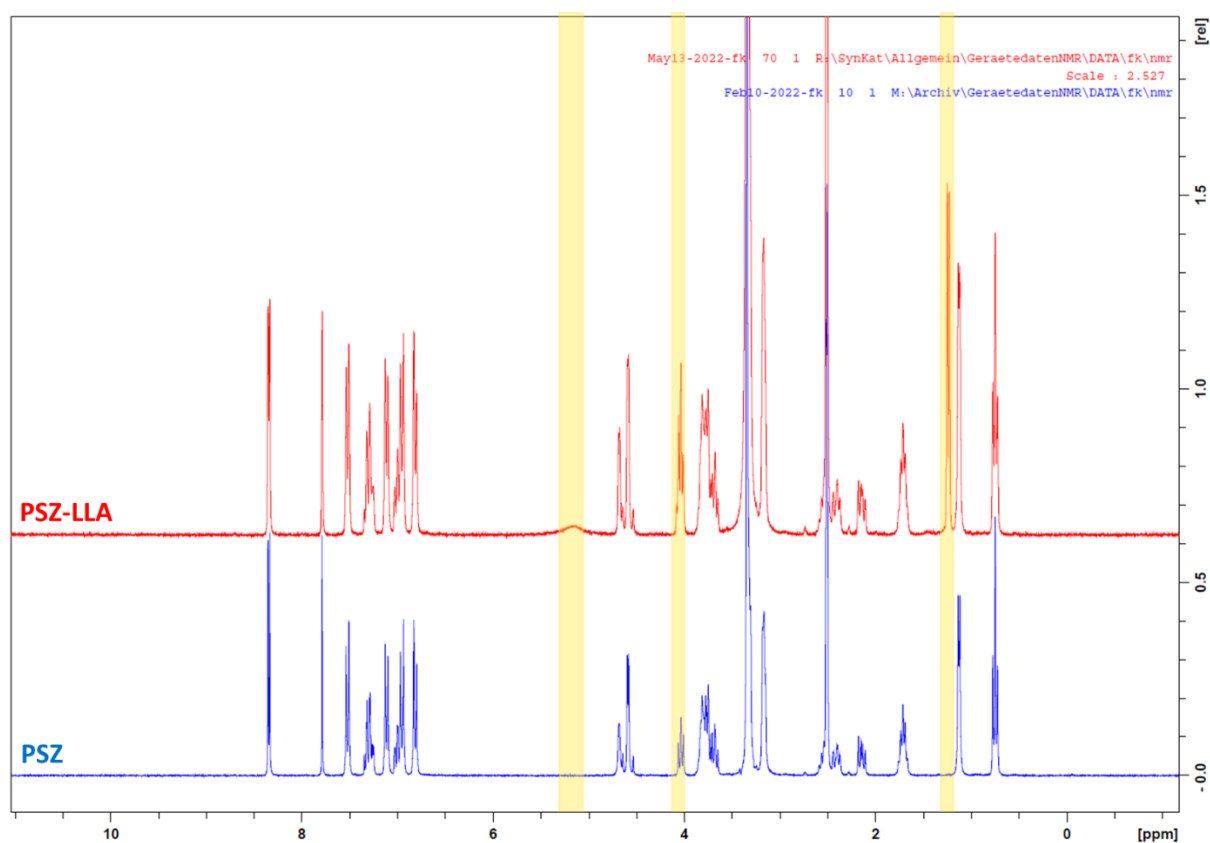

**Figure S50.** Proton NMR spectra of PSZ-LLA and PSZ collected in deuterated DMSO; chemical shifts reported in ppm. The peaks of the cofomer are highlighted in yellow.

## 12 Posaconazole – Adipic Acid Hydrate Cocrystal (PSZ-ADI-H<sub>2</sub>O)

### 12.1 TG-FTIR

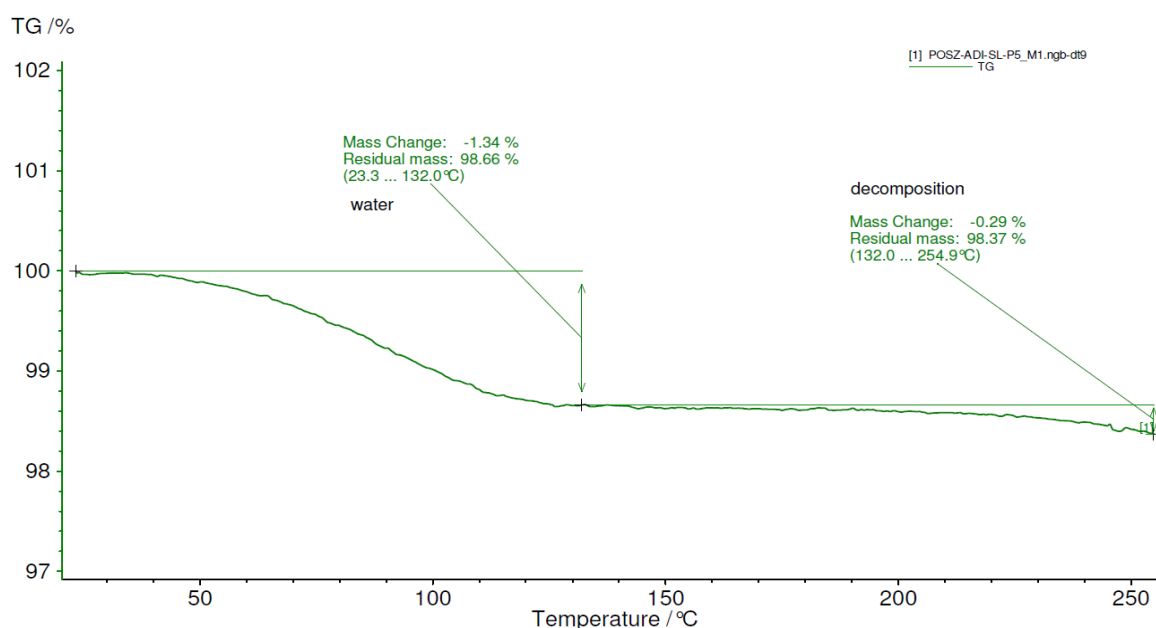

**Figure S51.** TG-FTIR thermogram of PSZ-ADI-H<sub>2</sub>O, collected with a heating rate of 10 K/min.

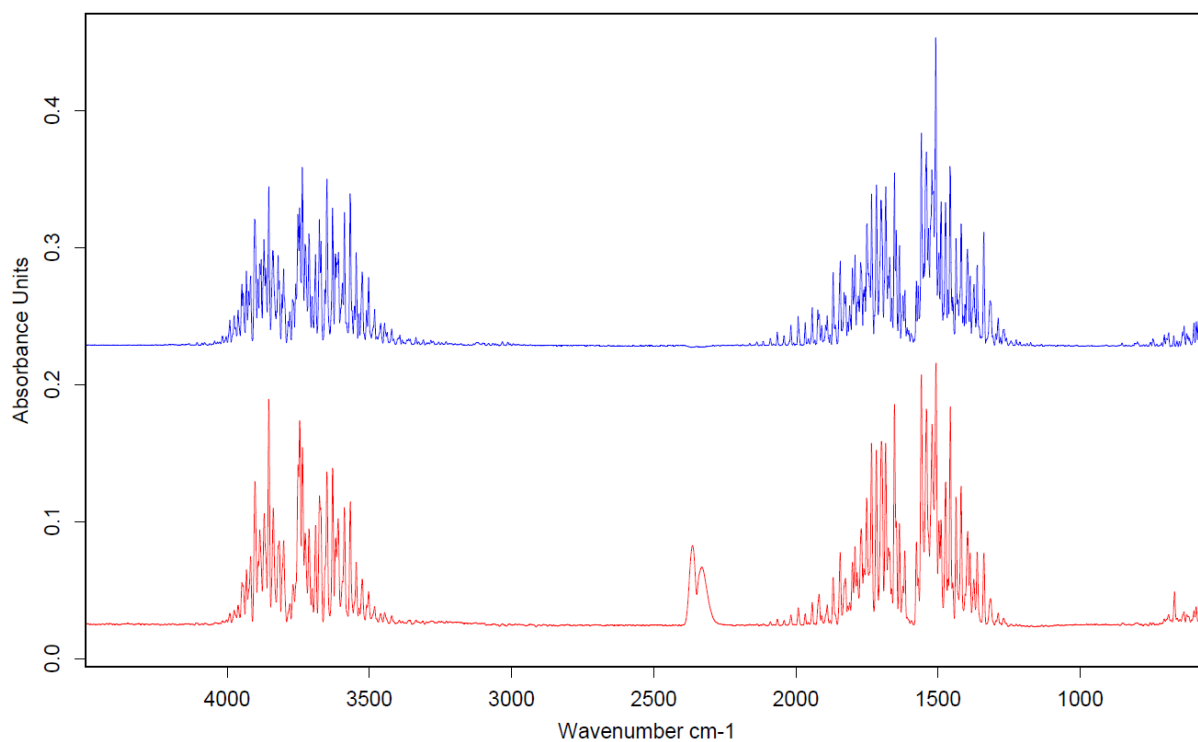

**Figure S52.** Comparison of the IR spectrum of the gas released at 25°C (red) with the spectrum of H<sub>2</sub>O (blue).

## 12.2 Raman Spectrum

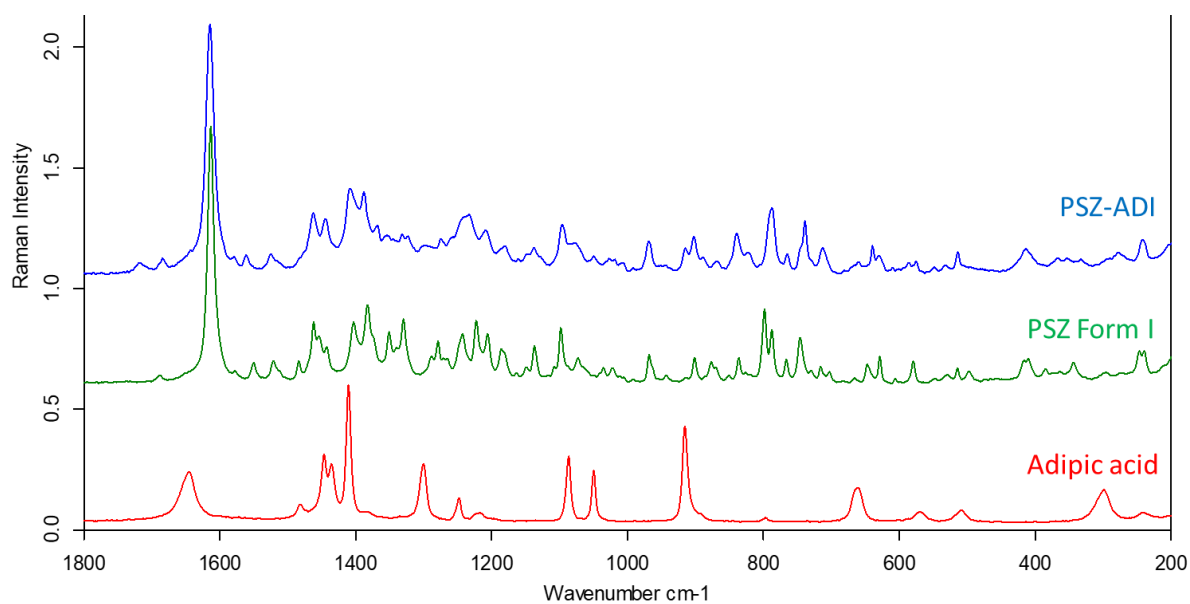

**Figure S53.** FT-Raman spectra of PSZ Form I, adipic acid and PSZ-ADI-H<sub>2</sub>O.

### 12.3 Powder X-ray Diffraction Patterns

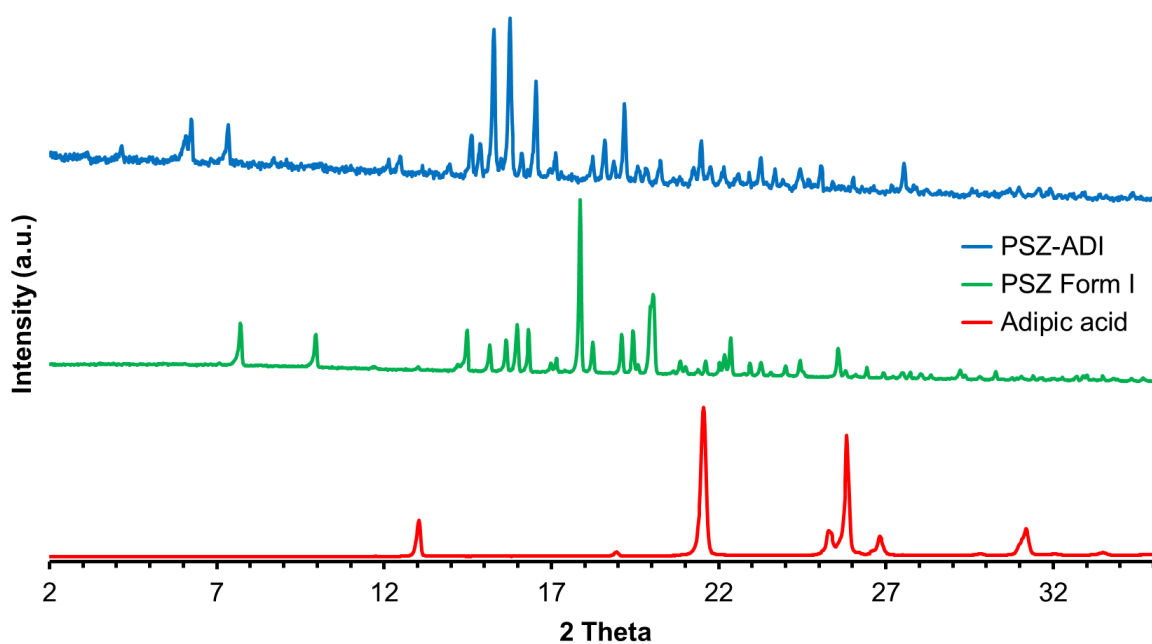

Figure S54. PXRD patterns of PSZ Form I, adipic acid and PSZ-ADI-H<sub>2</sub>O.

### 12.4 Proton Nuclear Magnetic Resonance (<sup>1</sup>H-NMR)

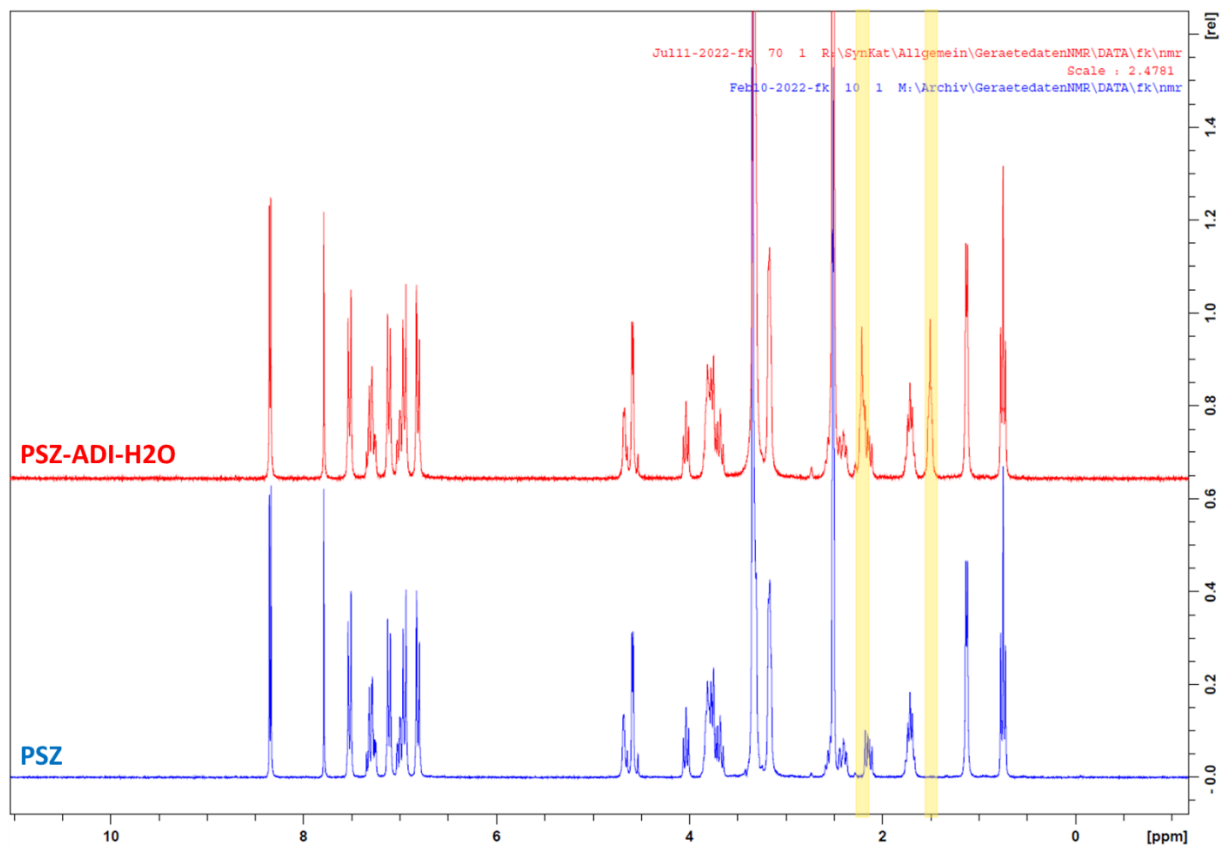

Figure S55. Proton NMR spectra of PSZ-ADI-H<sub>2</sub>O and PSZ collected in deuterated DMSO; chemical shifts reported in ppm. The peaks of the coformer are highlighted in yellow.

## 13 Posaconazole – Succinic Acid Hydrate Cocrystal (PSZ-SUC-H2O)

### 13.1 TG-FTIR

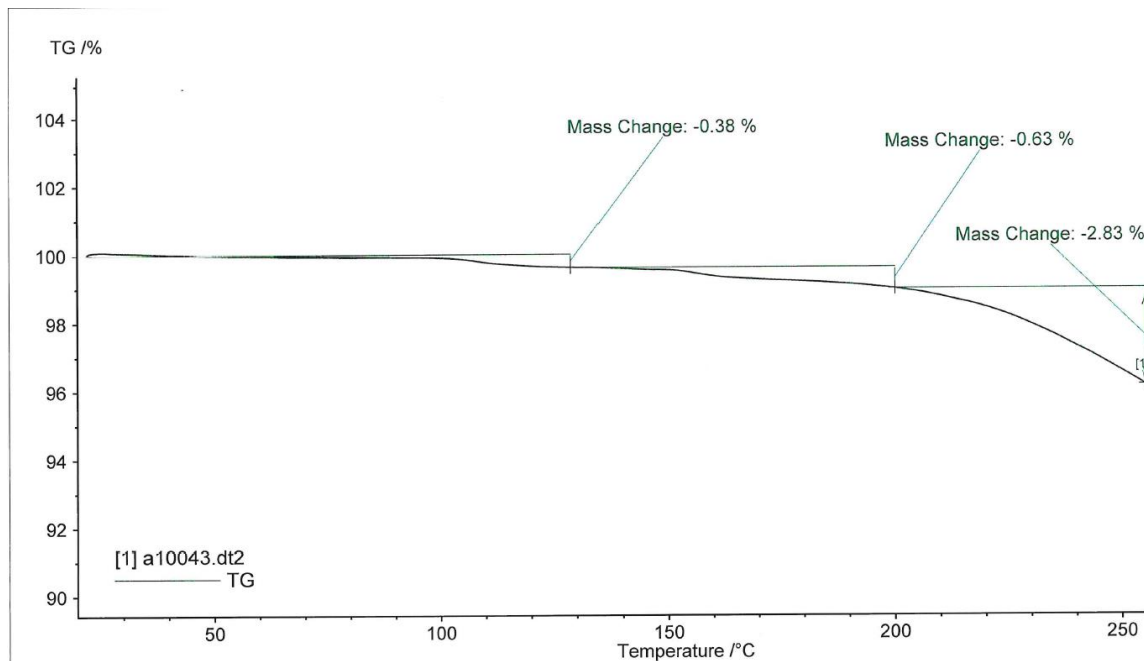

Figure S56. TG-FTIR thermogram of PSZ-SUC-H<sub>2</sub>O, collected with a heating rate of 10 K/min.

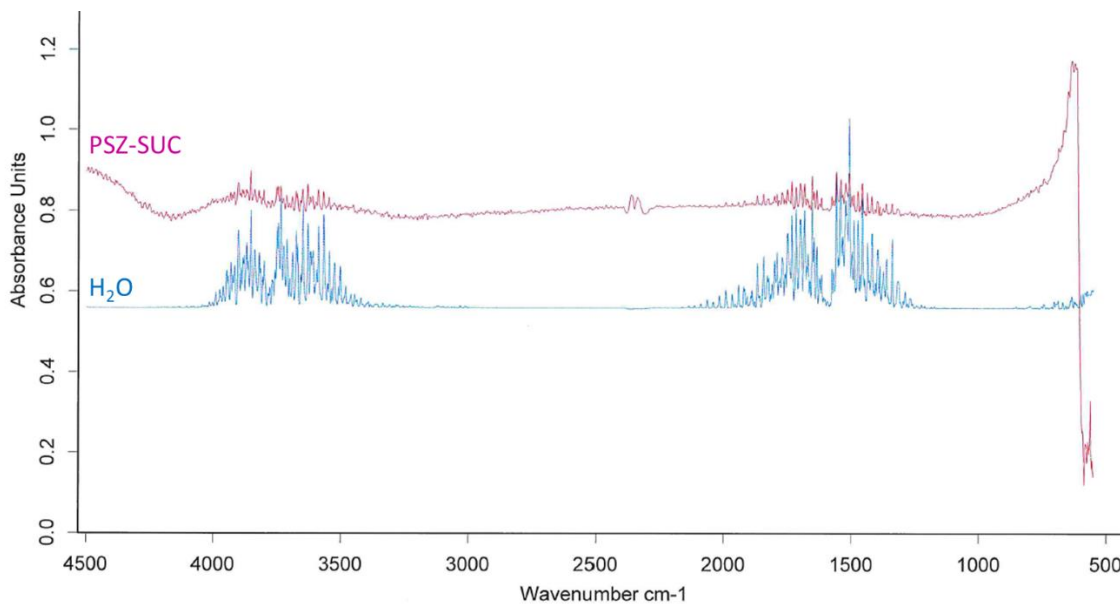

Figure S57. Comparison of the IR spectrum of the gas released at 100°C (red) with the spectrum of H<sub>2</sub>O (blue).

### 13.2 Raman Spectrum

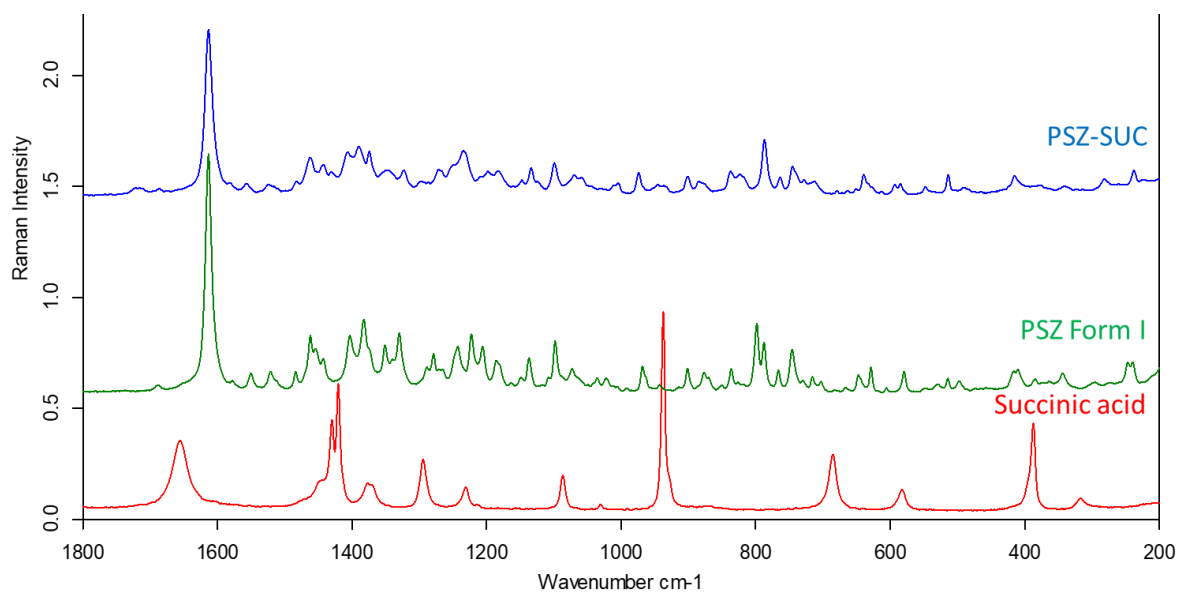

Figure S58. FT-Raman spectra of PSZ Form I, succinic acid and PSZ-SUC-H<sub>2</sub>O.

### 13.3 Powder X-ray Diffraction Patterns

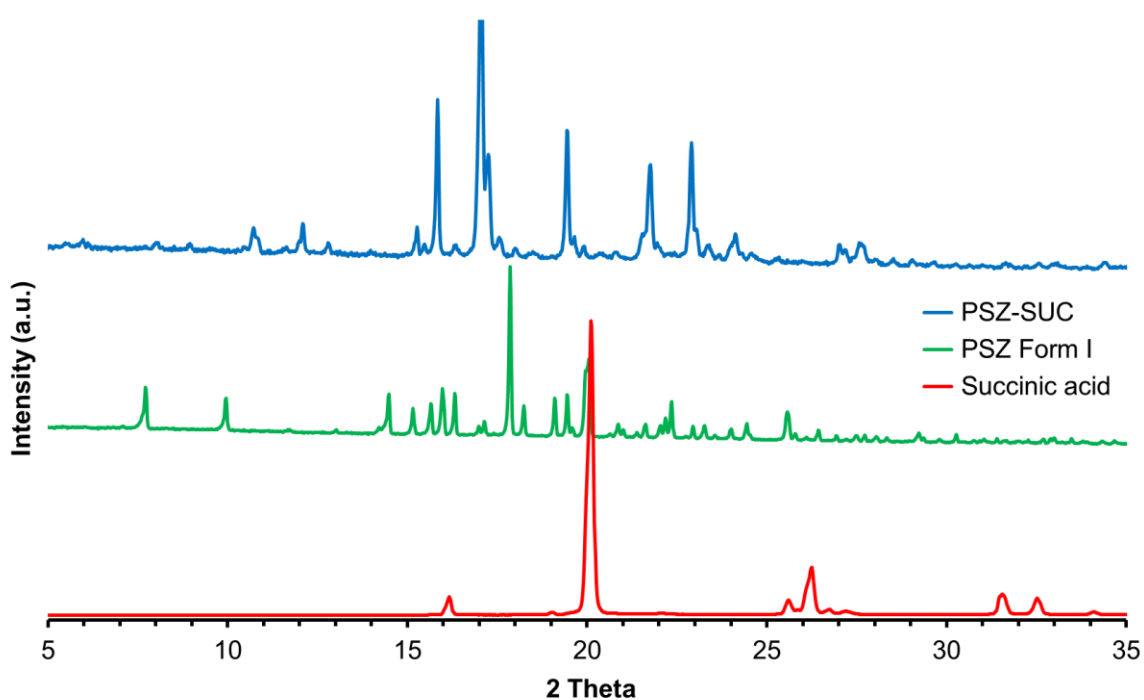

Figure S59. PXRD patterns of PSZ Form I, succinic acid and PSZ-SUC-H<sub>2</sub>O.

## 13.4 Proton Nuclear Magnetic Resonance ( $^1\text{H-NMR}$ )

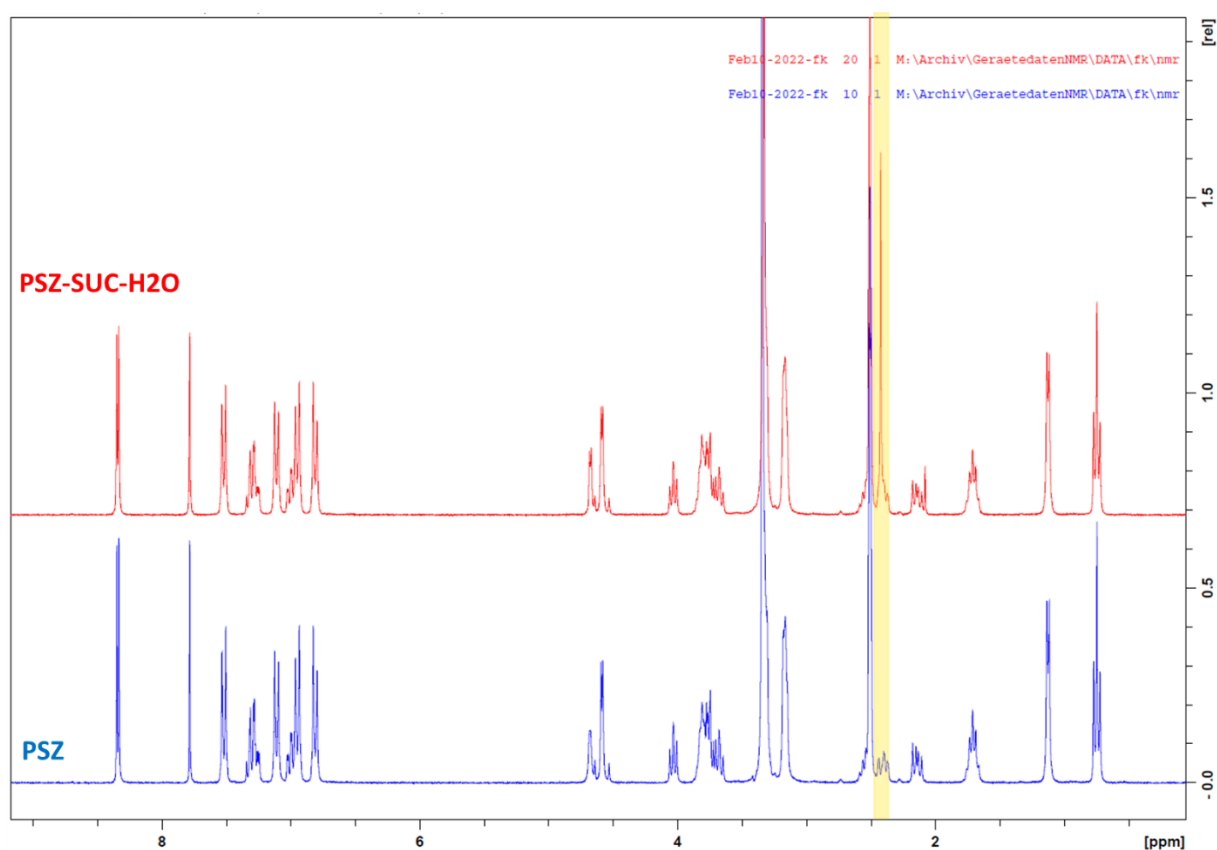

**Figure S60.** Proton NMR spectra of PSZ-SUC-H<sub>2</sub>O and PSZ collected in deuterated DMSO; chemical shifts reported in ppm. The peaks of the coformer are highlighted in yellow.

## 14 Posaconazole – Fumaric Acid THF Solvate Cocrystal (PSZ-FUM-THF)

### 14.1 TG-FTIR

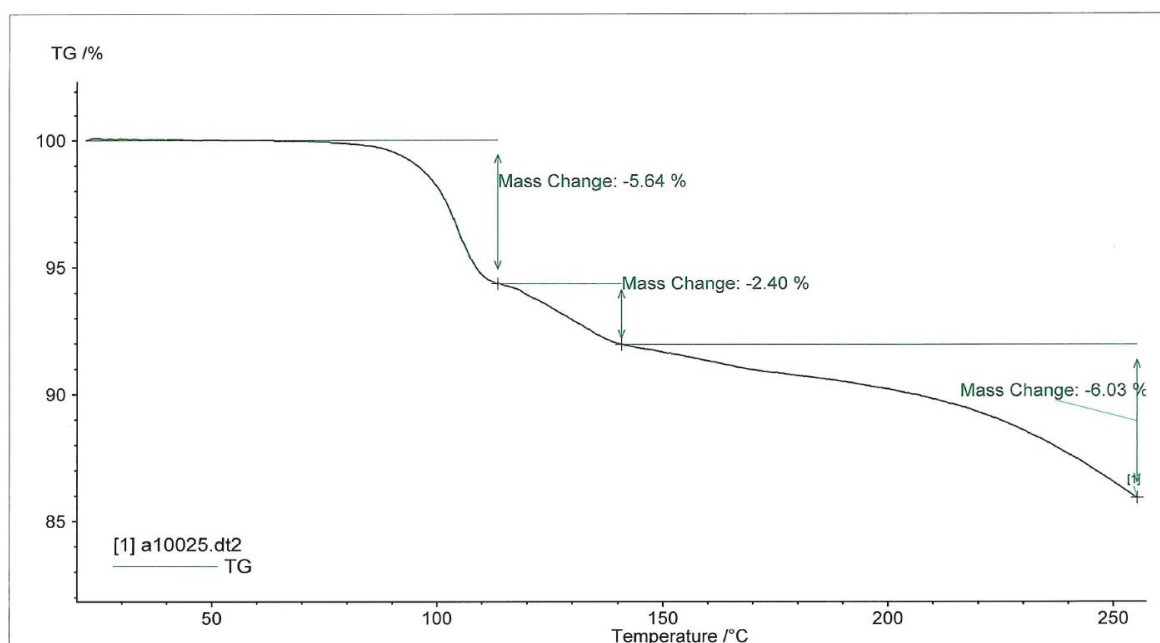

**Figure S61.** TG-FTIR thermogram of PSZ-FUM-THF, collected with a heating rate of 10 K/min.

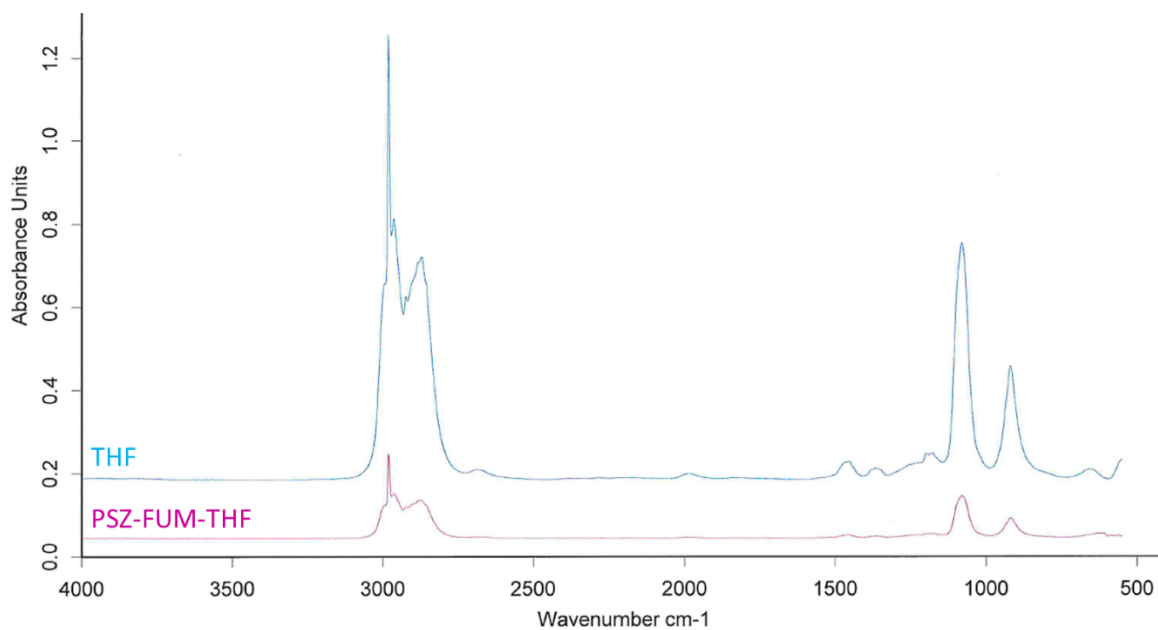

**Figure S62.** Comparison of the IR spectrum of the gas released at 100°C (red) with the spectrum of THF (blue).

## 14.2 Raman Spectrum

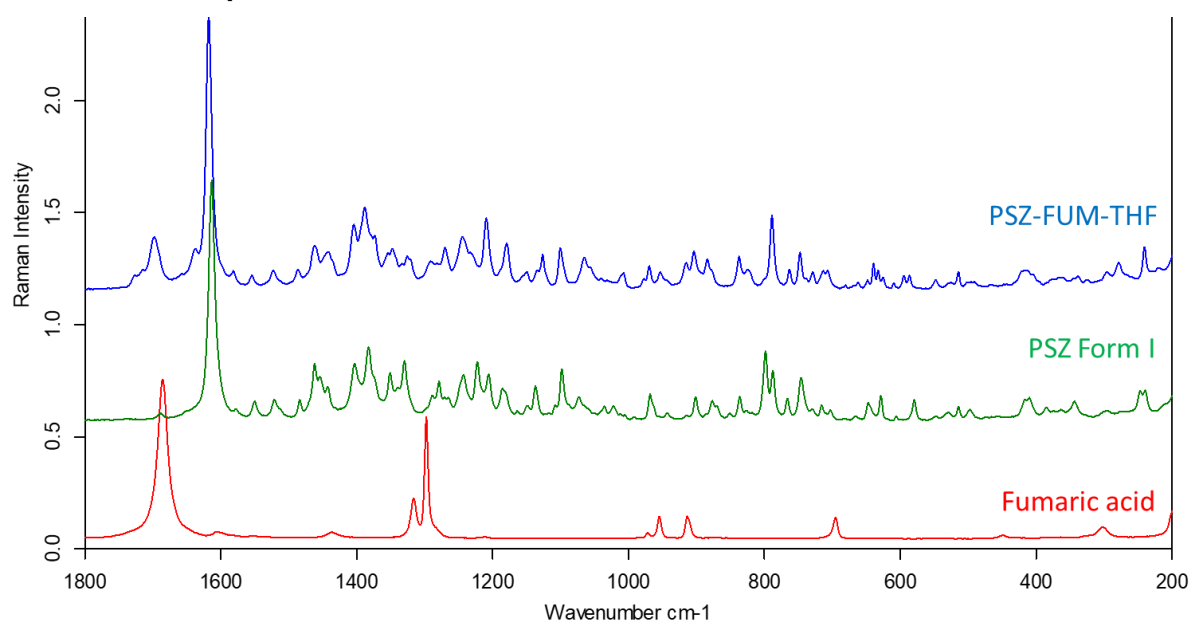

**Figure S63.** FT-Raman spectra of PSZ Form I, fumaric acid and PSZ-FUM-THF.

### 14.3 Powder X-ray Diffraction Patterns

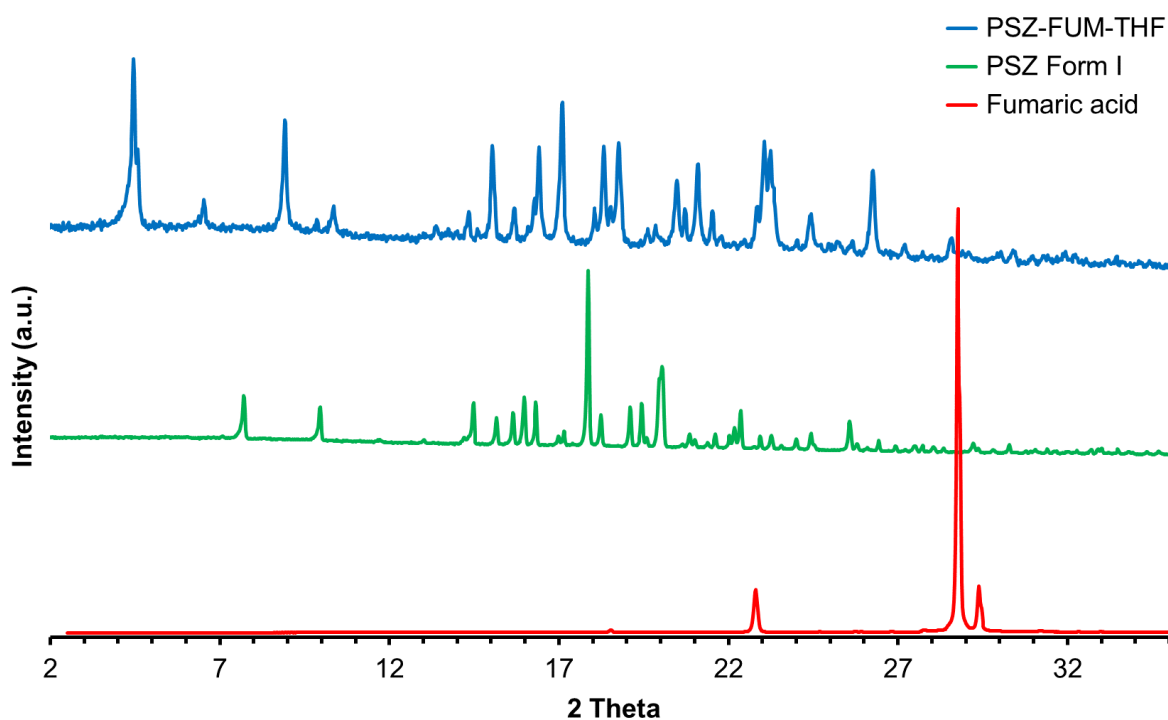

Figure S64. PXRD patterns of PSZ Form I, fumaric acid and PSZ-FUM-THF.

### 14.4 Proton Nuclear Magnetic Resonance ( $^1\text{H-NMR}$ )

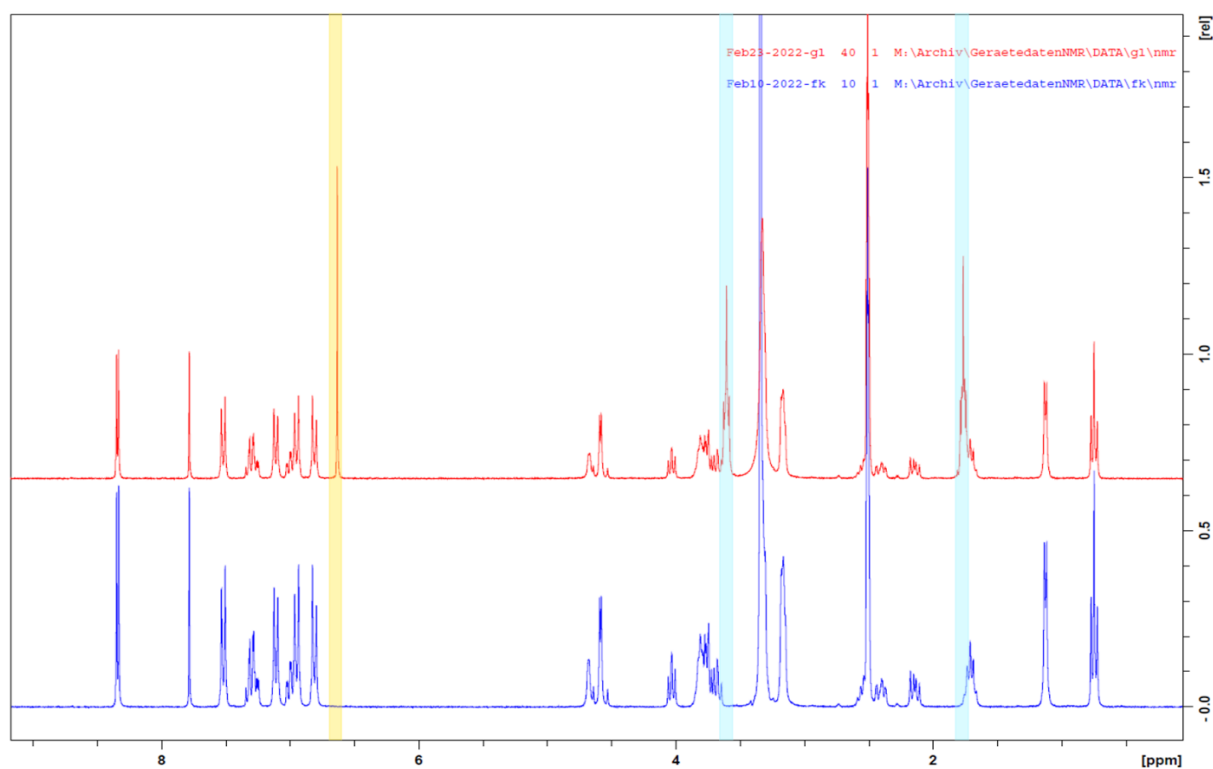

Figure S65. Proton NMR spectra of PSZ-FUM-THF and PSZ collected in deuterated DMSO; chemical shifts reported in ppm. The peaks of the coformer are highlighted in yellow, while the peaks of THF are highlighted in blue.



## 15 Posaconazole – Fumaric Acid Hydrate Cocrystal (PSZ-FUM-H2O)

### 15.1 TG-FTIR

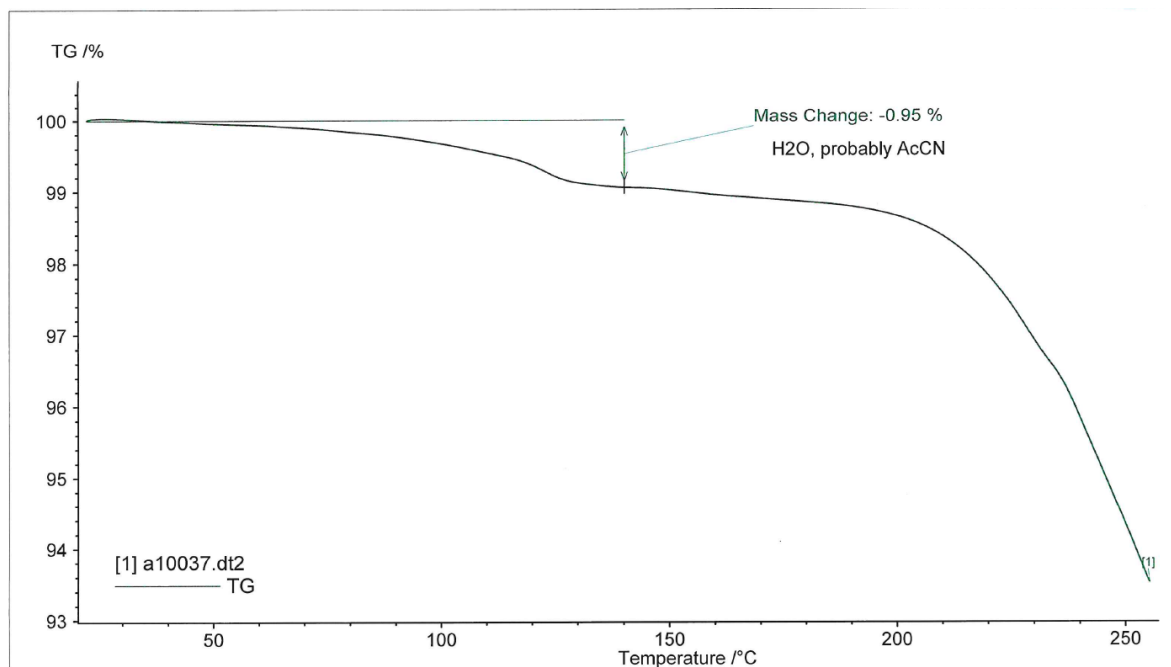

**Figure S66.** TG-FTIR thermogram of PSZ-FUM-H<sub>2</sub>O, collected with a heating rate of 10 K/min.

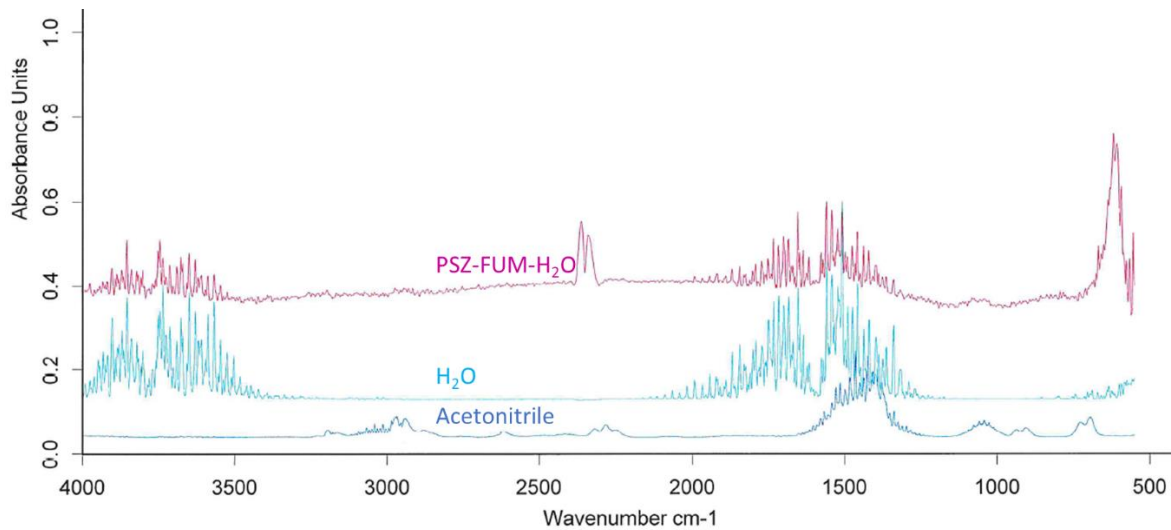

**Figure S67.** Comparison of the IR spectrum of the gas released at 100°C (red) with the spectrum of H<sub>2</sub>O and acetonitrile.

## 15.2 Raman Spectrum

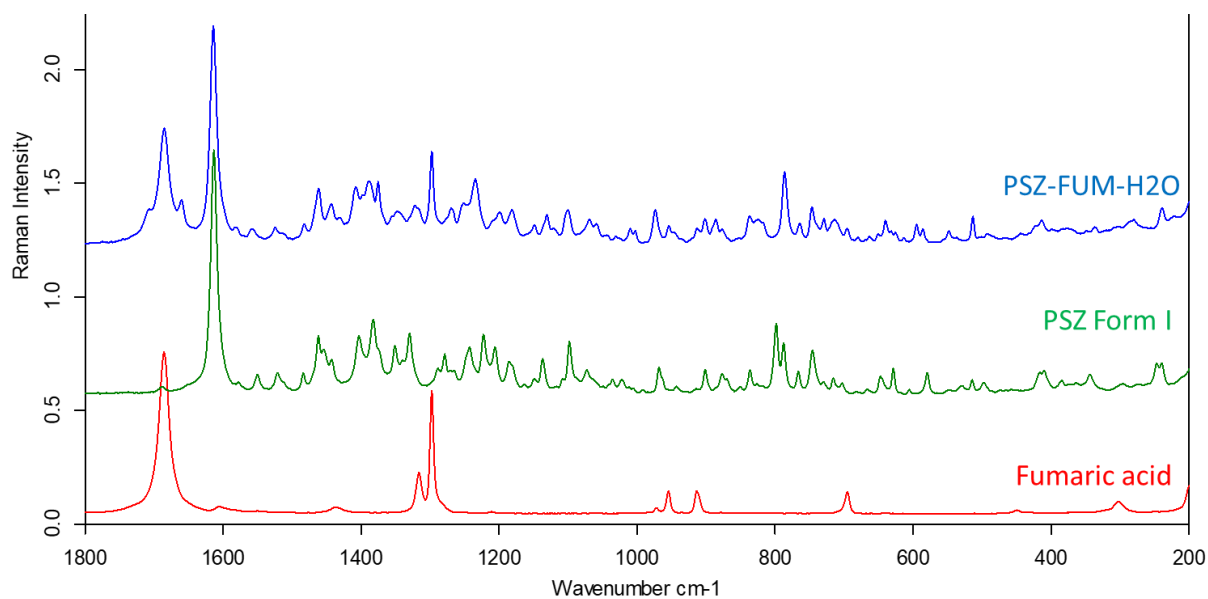

Figure S68. FT-Raman spectra of PSZ Form I, fumaric acid and PSZ-FUM-H2O.

## 15.3 Powder X-ray Diffraction Patterns

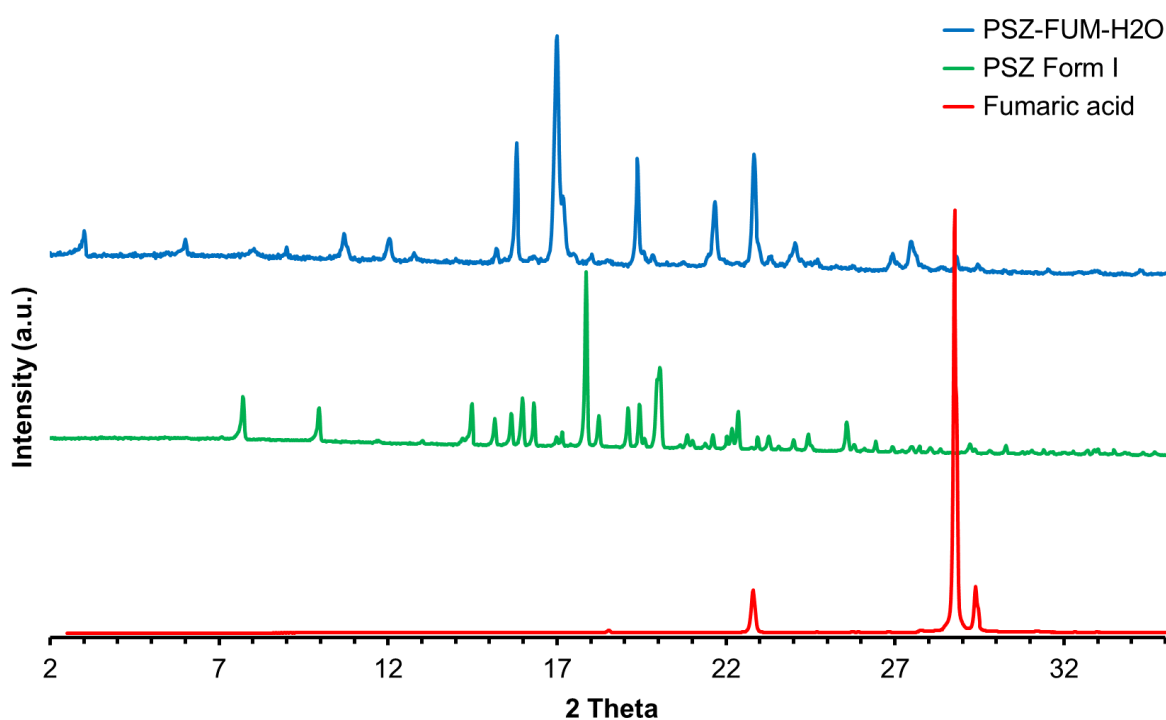

Figure S69. PXRD patterns of PSZ Form I, fumaric acid and PSZ-FUM-H2O.

## 15.4 Proton Nuclear Magnetic Resonance ( $^1\text{H-NMR}$ )

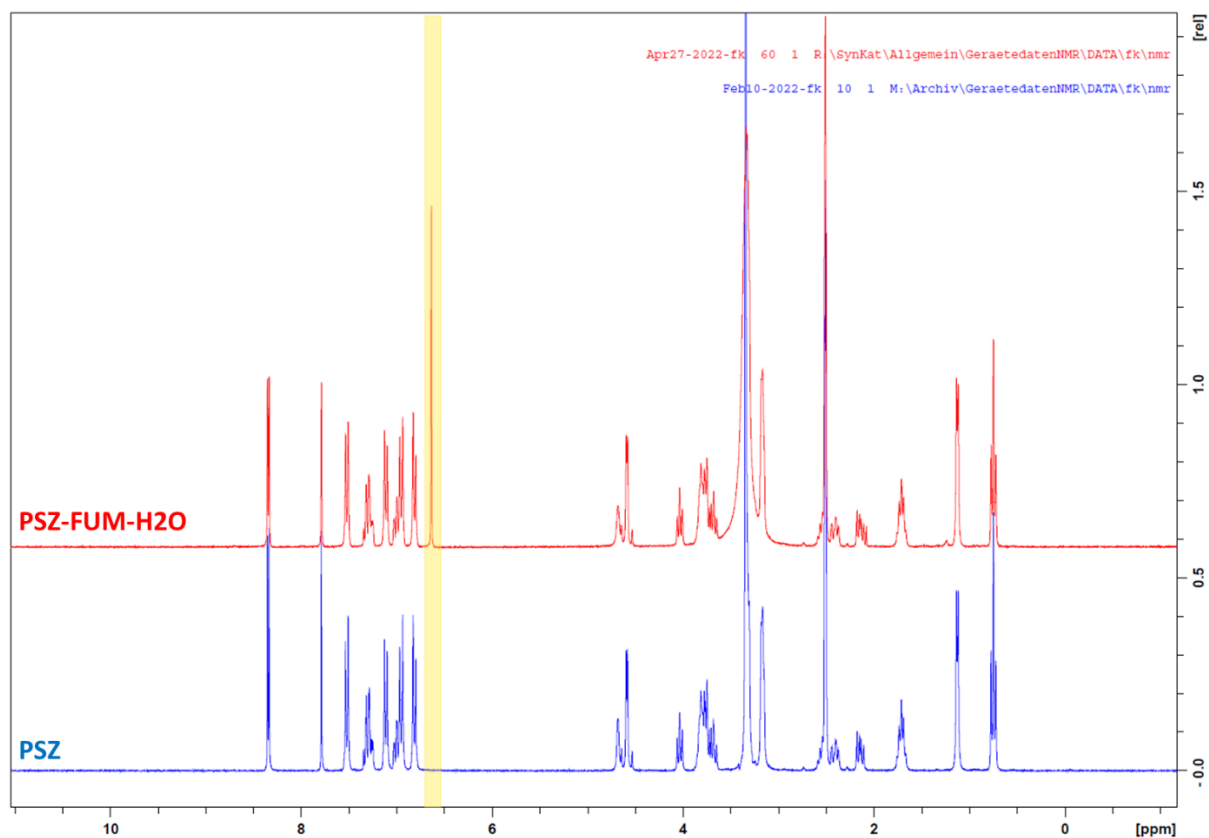

**Figure S70.** Proton NMR spectra of PSZ-FUM-H<sub>2</sub>O and PSZ collected in deuterated DMSO; chemical shifts reported in ppm. The peaks of the coformer are highlighted in yellow.

## 16 Posaconazole – 3,4-Dihydroxybenzoic Acid Hydrate Cocrystal (PSZ-DHB-H<sub>2</sub>O)

### 16.1 TG-FTIR

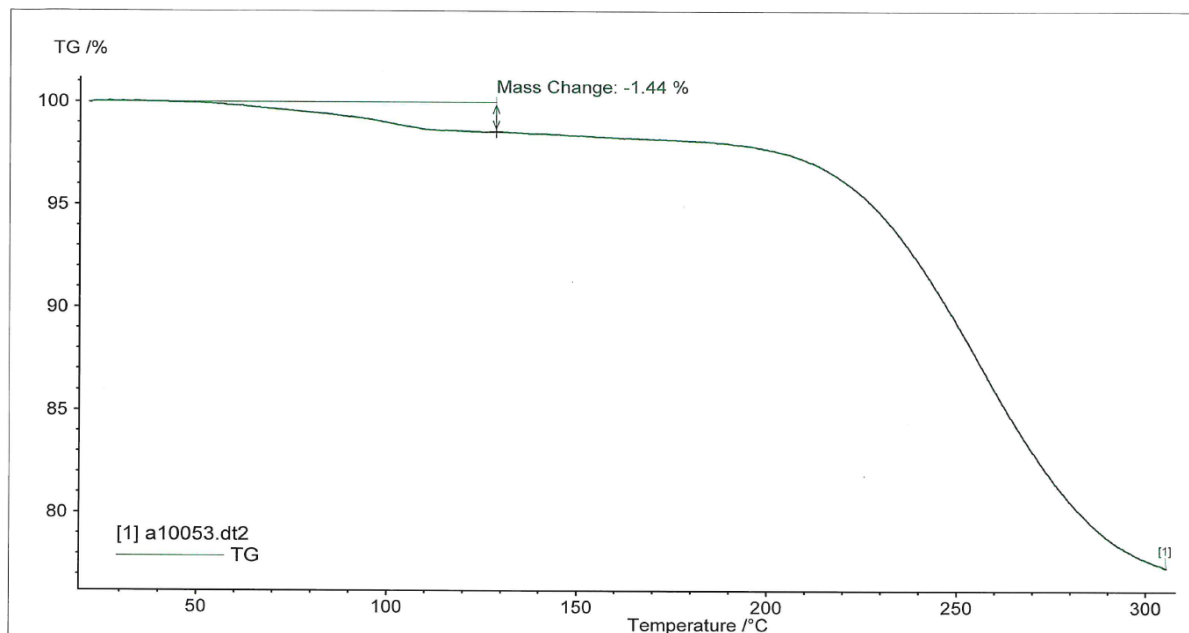

**Figure S71.** TG-FTIR thermogram of PSZ-DHB-H<sub>2</sub>O, collected with a heating rate of 10 K/min.

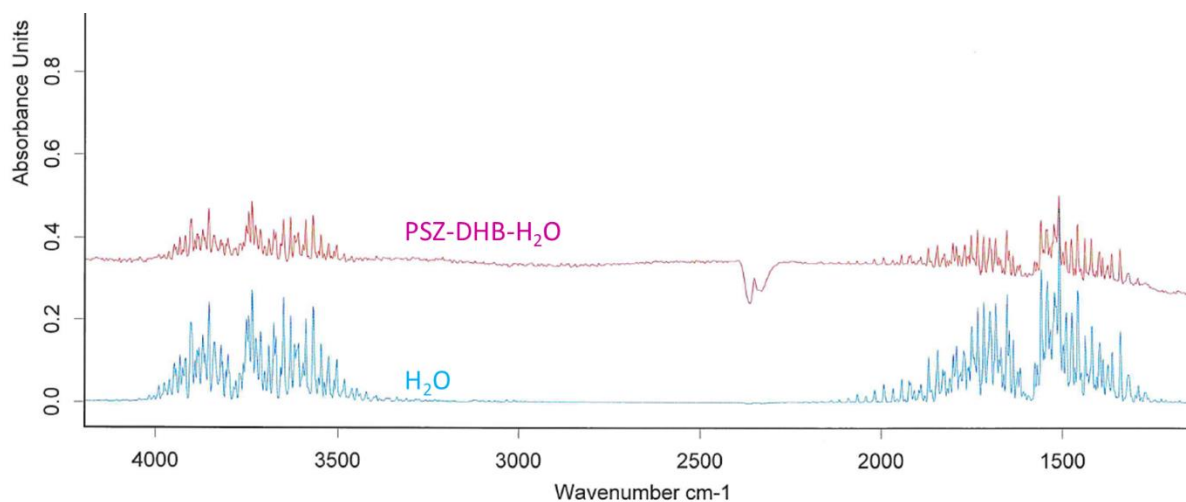

**Figure S72.** Comparison of the IR spectrum of the gas released at 90°C (red) with the spectrum of H<sub>2</sub>O (blue).

## 16.2 Raman Spectrum

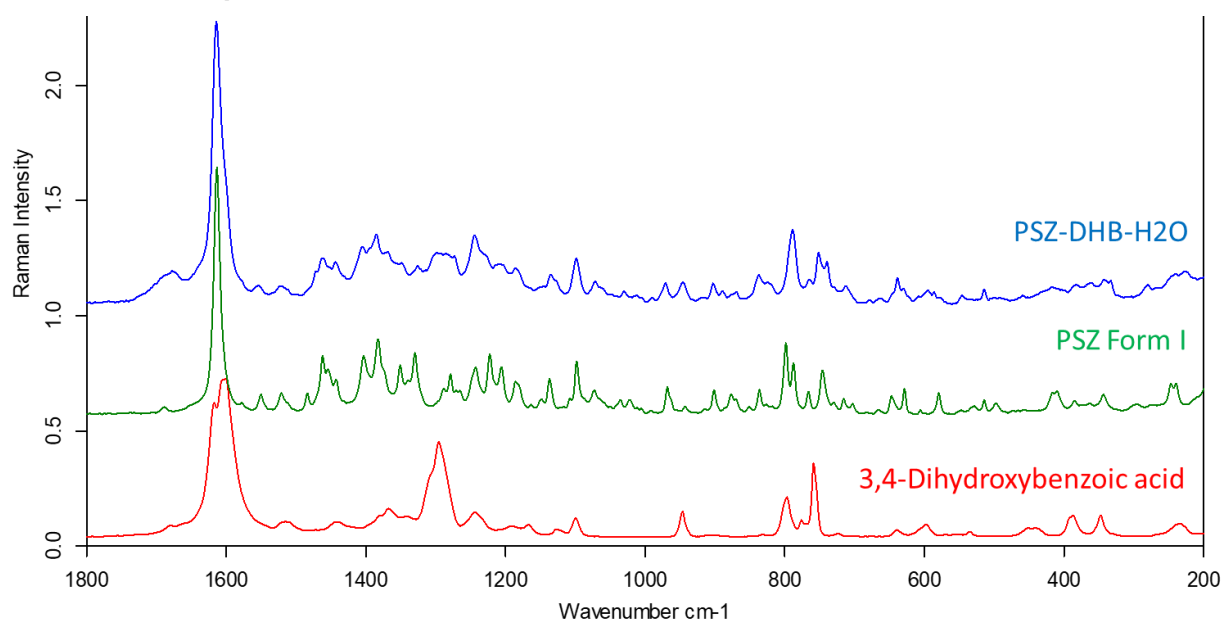

Figure S73. FT-Raman spectra of PSZ Form I, 3,4-dihydroxybenzoic acid and PSZ-DHB-H2O.

## 16.3 Powder X-ray Diffraction Patterns

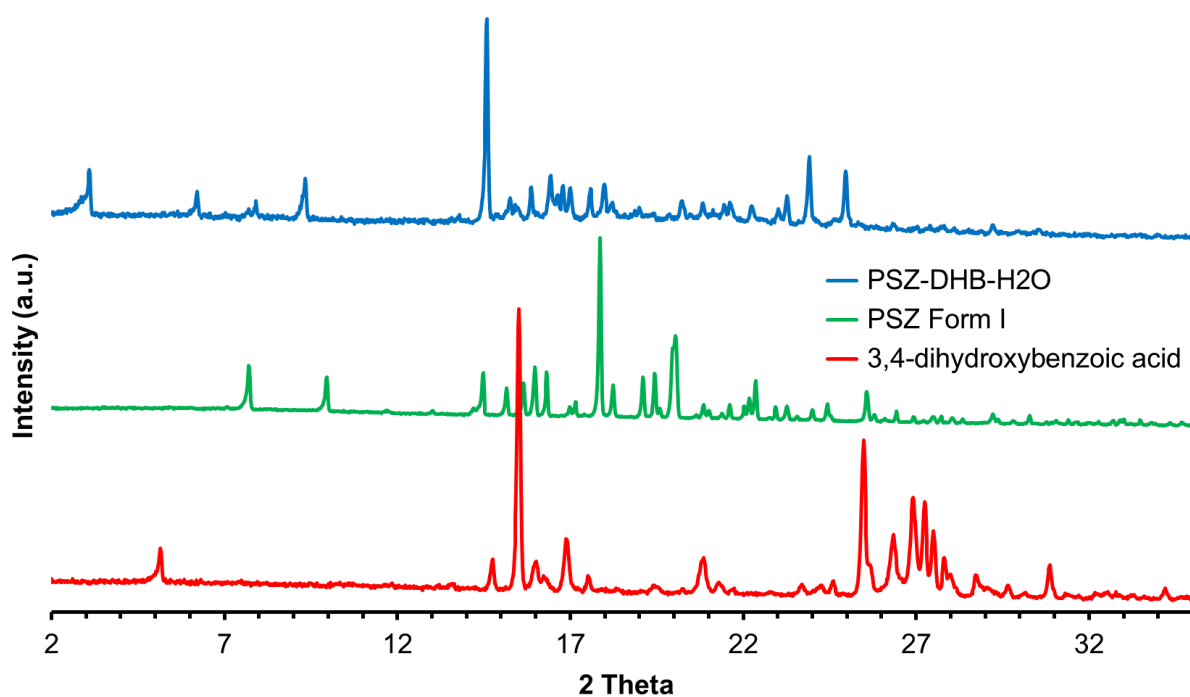

Figure S74. PXRD patterns of PSZ Form I, 3,4-dihydroxybenzoic acid and PSZ-DHB-H2O.

## 16.4 Proton Nuclear Magnetic Resonance ( $^1\text{H-NMR}$ )

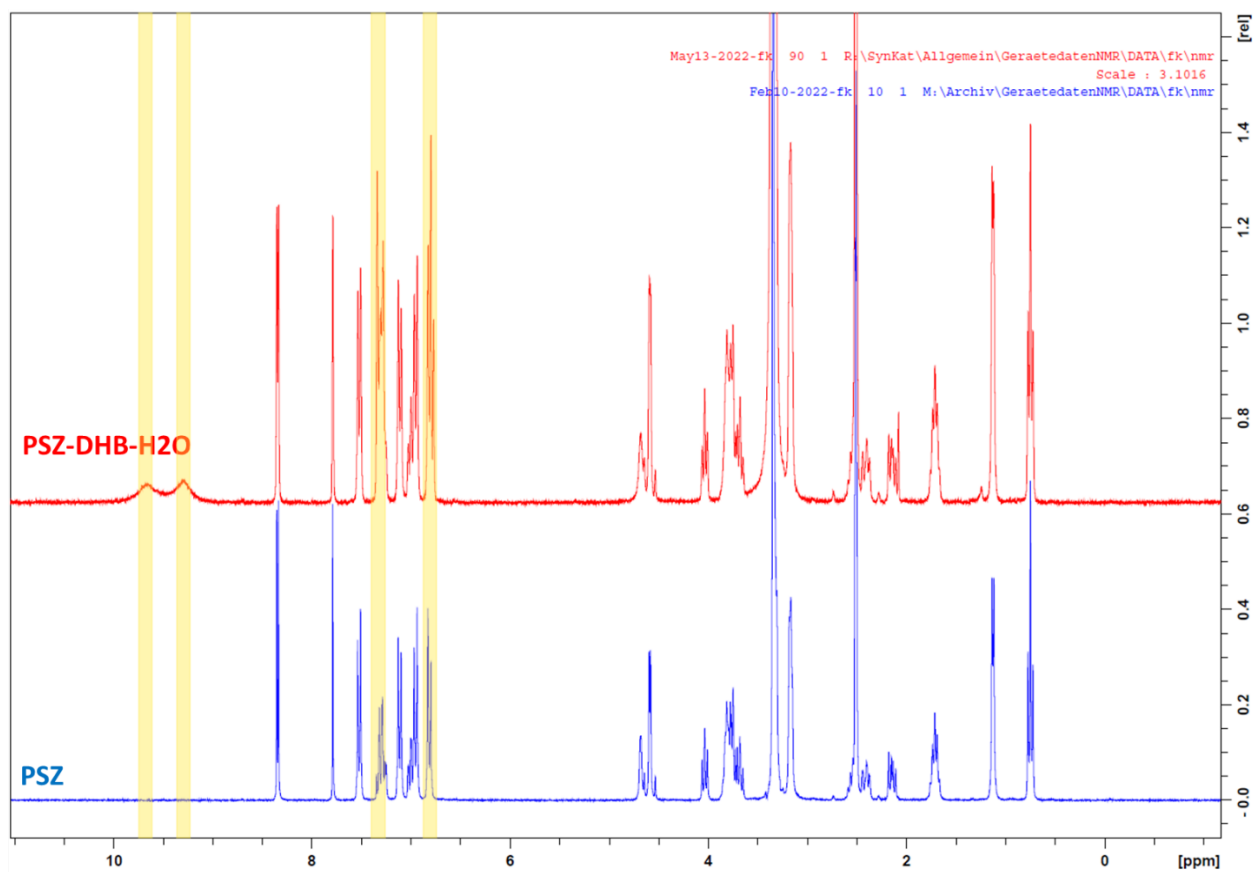

**Figure S75.** Proton NMR spectra of PSZ-DHB-H<sub>2</sub>O and PSZ collected in deuterated DMSO; chemical shifts reported in ppm. The peaks of the coformer are highlighted in yellow.

## 17 Posaconazole-Oxalic acid Complex

### 17.1.1 Powder X-ray Diffraction pattern

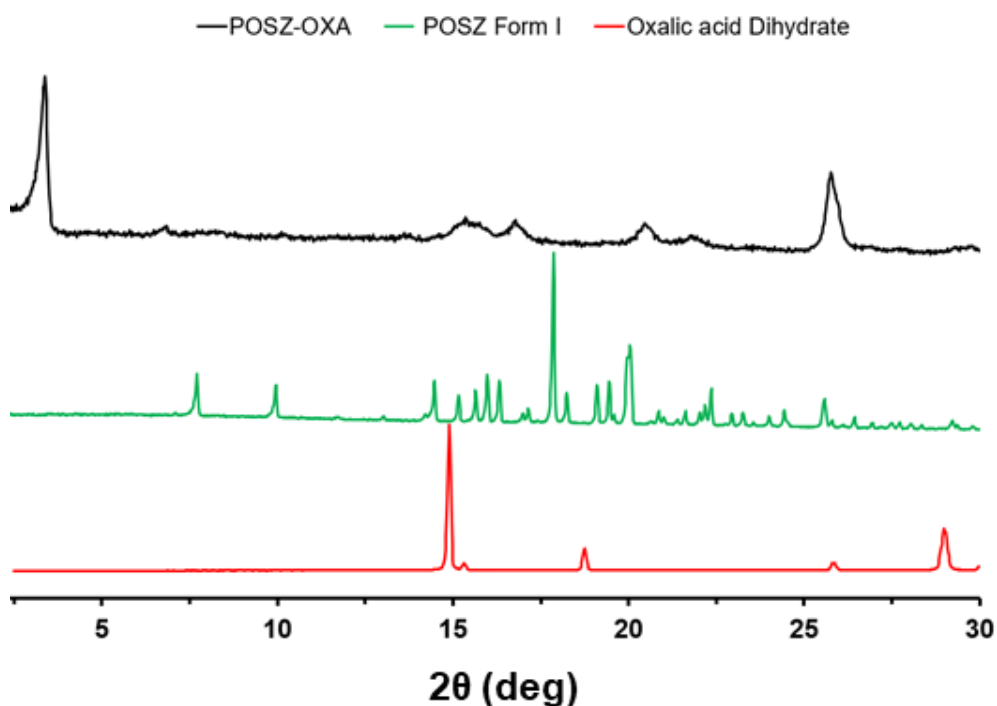

**Figure S76.** Experimental PXRD patterns of Posaconazole (PSZ Form I), oxalic acid dihydrate and the new solid form (POSZ-OXA) obtained with LAG and RC experiments.

## 18 Computational Tools Comparison

### 18.1 Hydrogen Bond Propensity

**Table S3.** HBP coformer ranking according to multicomponent score, area under ROC reported for the fitted model and comparison with the experimental results. Positive cocrystallization results are reported in green (v) while negative results are reported in blue (x).

| Coformer                  | HBP prediction |                       |                          | Experimental cocrystal |
|---------------------------|----------------|-----------------------|--------------------------|------------------------|
|                           | HBP ranking    | multi-component score | Area under the ROC curve |                        |
| Maltol                    | 1              | 0.127                 | 0.815                    | x                      |
| 3,4-Dihydroxybenzoic acid | 2              | 0.119                 | 0.833                    | v                      |
| 4-Aminobenzoic acid       | 3              | 0.116                 | 0.870                    | v                      |
| Salicylic acid            | 4              | 0.108                 | 0.833                    | v                      |

|                           |    |        |       |   |
|---------------------------|----|--------|-------|---|
| Vanillic acid             | 5  | 0.082  | 0.837 | x |
| Pyridoxine                | 6  | 0.079  | 0.789 | x |
| Ferulic acid              | 7  | 0.076  | 0.837 | v |
| 1-Hydroxy-2-naphtoic acid | 8  | 0.075  | 0.833 | v |
| Vanillin                  | 9  | 0.071  | 0.834 | x |
| Nicotinamide              | 10 | 0.060  | 0.837 | x |
| Xylitol                   | 11 | 0.053  | 0.834 | x |
| D-Mannitol                | 12 | 0.050  | 0.835 | x |
| trans-Aconitic acid       | 13 | 0.050  | 0.864 | x |
| Maleic acid               | 14 | 0.043  | 0.865 | v |
| Fumaric acid              | 15 | 0.042  | 0.864 | v |
| Adipic acid               | 16 | 0.040  | 0.865 | v |
| L-Proline                 | 17 | 0.039  | 0.859 | x |
| Succinic acid             | 18 | 0.036  | 0.865 | v |
| Nicotinic acid            | 19 | 0.032  | 0.866 | x |
| L-Lactic acid             | 20 | 0.027  | 0.864 | v |
| L-Malic acid              | 21 | 0.016  | 0.864 | v |
| Gentisic acid             | 22 | 0.012  | 0.871 | v |
| Urea                      | 23 | 0.012  | 0.894 | x |
| DL-Tartaric acid          | 24 | 0.009  | 0.863 | x |
| L-Tartaric acid           | 25 | 0.009  | 0.863 | x |
| Citric acid               | 26 | 0.007  | 0.833 | v |
| Benzoic acid              | 27 | -0.022 | 0.875 | x |
| Oxalic acid               | 28 | -0.156 | 0.865 | x |

---



## 18.2 Molecular Complementarity

**Table S4.** MC coformer ranking based on calculated complementarity score, hit rate percentage and comparison with experimental results. Positive cocrystallization results are reported in green (v) while negative results are reported in blue (x).

| Coformer                   | MC ranking | Complementarity score | Hit rate (%) | Experimental cocrystal |
|----------------------------|------------|-----------------------|--------------|------------------------|
| Ferulic acid               | 1          | 2.98                  | 30           | v                      |
| Adipic acid                | 2          | 3.11                  | 10           | v                      |
| 1-Hydroxy-2-naphthoic acid | 3          | 3.32                  | 0            | v                      |
| 4-Aminobenzoic acid        | 4          | 3.42                  | 0            | v                      |
| Benzoic acid               | 5          | 3.49                  | 0            | x                      |
| 3,4-dihydroxybenzoic acid  | 6          | 3.56                  | 0            | v                      |
| Nicotinamide               | 7          | 3.60                  | 0            | x                      |
| Nicotinic acid             | 8          | 3.69                  | 0            | x                      |
| Fumaric acid               | 9          | 3.80                  | 0            | v                      |
| Vanillin                   | 10         | 3.84                  | 0            | x                      |
| Salicylic acid             | 11         | 3.88                  | 0            | v                      |
| Succinic acid              | 12         | 3.91                  | 10           | v                      |
| Maleic acid                | 13         | 4.04                  | 0            | v                      |
| Malic acid                 | 14         | 4.16                  | 0            | v                      |
| Gentisic acid              | 15         | 4.18                  | 0            | v                      |
| Citric acid                | 16         | 4.20                  | 0            | v                      |
| Pyridoxine                 | 17         | 4.28                  | 0            | x                      |
| Vanillic acid              | 18         | 4.41                  | 0            | x                      |
| Xylitol                    | 19         | 4.55                  | 0            | x                      |
| L-proline                  | 20         | 4.55                  | 0            | x                      |

|                     |    |      |   |   |
|---------------------|----|------|---|---|
| Maltol              | 21 | 4.67 | 0 | x |
| Mannitol            | 22 | 4.89 | 0 | x |
| trans-Aconitic acid | 23 | 4.98 | 0 | x |
| L-lactic acid       | 24 | 5.56 | 0 | v |
| Oxalic acid         | 25 | 5.58 | 0 | x |
| DL-tartaric acid    | 26 | 5.71 | 0 | x |
| L-tartaric acid     | 27 | 5.71 | 0 | x |
| Urea                | 28 | 6.16 | 0 | x |

---

**Table S5.** Result of molecular complementarity analysis. For each posaconazole conformation the molecular descriptors that fail the complementarity criterion with the coformer are reported: M/L (red), S (blue), S/L (black), FNO (green), D (violet).

| Coformer                  | Posaconazole Conformations |             |             |             |             |             |             |             |             |             |
|---------------------------|----------------------------|-------------|-------------|-------------|-------------|-------------|-------------|-------------|-------------|-------------|
|                           | 1                          | 2           | 3           | 4           | 5           | 6           | 7           | 8           | 9           | 10          |
| Salicylic acid            | M/L, S                     | M/L, S      | M/L, S      | M/L, S      | M/L, S      | M/L, S      | M/L, S      | M/L, S      | M/L, S      | M/L, S      |
| 4-aminobenzoic acid       | S                          | S           | S           | S           | M/L, S      | M/L, S      | M/L, S      | M/L, S      | S           | S, D        |
| trans-aconitic acid       | M/L, S                     | M/L, S      | M/L, S      | M/L, S      | M/L, S      | M/L, S      | M/L, S      | M/L, S      | M/L, S      | M/L, S, D   |
| Xinafoic acid             | S                          | M/L, S      | S           | S           | M/L, S      | M/L, S      | M/L, S      | M/L, S      | S           | M/L, S, D   |
| 3,4-dihydroxybenzoic acid | S                          | M/L, S      | S           | S           | M/L, S      | M/L, S      | M/L, S      | M/L, S      | S           | M/L, S      |
| gentisic acid             | M/L, S                     | M/L, S      | M/L, S      | M/L, S      | M/L, S      | M/L, S      | M/L, S      | M/L, S      | M/L, S      | M/L, S      |
| Maleic acid               | S                          | S           | S           | S           | M/L, S      | M/L, S      | M/L, S      | M/L, S      | S           | S           |
| Malic acid                | FNO                        | S, FNO      | S/L, FNO    | S, FNO      | M/L, FNO    | M/L, S, FNO | M/L, S, FNO | M/L, S, FNO | FNO         | S, FNO      |
| Oxalic acid               | M/L, S, FNO                | M/L, S, FNO | M/L, S, FNO | M/L, S, FNO | M/L, S, FNO | M/L, S, FNO | M/L, S, FNO | M/L, S, FNO | M/L, S, FNO | M/L, S, FNO |
| Pyridoxine                | M/L                        | M/L, S      | M/L, S/L    | M/L, S      | M/L         | M/L, S      | M/L, S/L    | M/L, S      | M/L         | M/L, S, D   |
| Vanillin                  | M/L, S                     | M/L, S      | M/L         | M/L, S      |
| Ferulic acid              |                            | S           |             | S           | M/L, S      | M/L, S      | M/L         | M/L, S      |             | S           |

| Coformer        | Posaconazole Conformations |           |           |           |                  |                |                  |                  |           |                |
|-----------------|----------------------------|-----------|-----------|-----------|------------------|----------------|------------------|------------------|-----------|----------------|
|                 | 1                          | 2         | 3         | 4         | 5                | 6              | 7                | 8                | 9         | 10             |
| Xylitol         | S/L                        | S/L       | S/L       | S/L       | M/L, S/L         | M/L, S/L       | M/L, S/L         | M/L, S,<br>S/L   | S/L       | S/L            |
| Maltol          | M/L, S                     | M/L, S    | M/L       | M/L, S    | M/L, S           | M/L, S         | M/L, S           | M/L, S           | M/L, S    | M/L, S, D      |
| Vanillic acid   | M/L, S                     | M/L, S    | M/L, S    | M/L, S    | M/L, S           | M/L, S         | M/L, S           | M/L, S           | M/L, S    | M/L, S         |
| Nicotinic acid  | M/L, S                     | M/L, S    | M/L, S    | M/L, S    | M/L, S           | M/L, S         | M/L, S           | M/L, S           | M/L, S    | M/L, S, D      |
| L-lactic acid   | M/L, S/L                   | M/L, S/L  | M/L, S/L  | M/L, S/L  | M/L, S/L         | M/L, S,<br>S/L | M/L, S, S/L      | M/L, S,<br>S/L   | M/L, S/L  | M/L, S, S/L    |
| L-proline       | M/L, S/L                   | M/L, S/L  | M/L, S/L  | M/L, S/L  | M/L, S/L         | M/L, S/L       | M/L, S/L         | M/L, S,<br>S/L   | M/L, S/L  | M/L, S/L, D    |
|                 | M/L, S/L,                  | M/L, S/L, | M/L, S/L, | M/L, S/L, | M/L, S/L,        | M/L, S/L,      | M/L, S/L,        | M/L, S/L,        | M/L, S/L, | M/L, S/L,      |
| L-tartaric acid | FNO                        | FNO       | FNO       | FNO       | FNO              | FNO            | FNO              | FNO              | FNO       | FNO            |
| Adipic acid     | S                          | S         |           | S         | S                | S              | S                | S                | S         | S, S/L         |
| Benzoic acid    | S                          | M/L, S    | S         | S         | M/L, S           | M/L, S         | M/L, S           | M/L, S           | S         | M/L, S, S/L    |
| Citric acid     | S/L, FNO                   | S/L, FNO  | S/L, FNO  | S/L, FNO  | M/L, S/L,<br>FNO | M/L, FNO       | M/L, S/L,<br>FNO | M/L, S/L,<br>FNO | S/L, FNO  | M/L, D,<br>FNO |
| Fumaric acid    | S                          | S         | S         | S         | S                | S              | S                | S                | S         | S              |
| Mannitol        | M/L, S/L                   | M/L, S/L  | M/L, S/L  | M/L, S/L  | M/L, S/L         | M/L, S/L       | M/L, S/L         | M/L, S/L         | M/L, S/L  | M/L, S/L       |
| Nicotinamide    | S                          | M/L, S    | S         | S         | M/L, S           | M/L, S         | M/L, S           | M/L, S           | M/L, S    | M/L, S         |
| Succinic acid   | S                          | S         |           | S         | S                | S              | S                | S                | S         | S, S/L         |

| Coformer | Posaconazole Conformations |                |                     |                  |                     |                |                     |                  |                |                   |
|----------|----------------------------|----------------|---------------------|------------------|---------------------|----------------|---------------------|------------------|----------------|-------------------|
|          | 1                          | 2              | 3                   | 4                | 5                   | 6              | 7                   | 8                | 9              | 10                |
| Urea     | M/L, S, S/L,<br>FNO        | M/L, S,<br>FNO | M/L, S, S/L,<br>FNO | M/L, S/L,<br>FNO | M/L, S, S/L,<br>FNO | M/L, S,<br>FNO | M/L, S, S/L,<br>FNO | M/L, S/L,<br>FNO | M/L, S,<br>FNO | M/L, S, D,<br>FNO |

**Table S6.** MC coformer ranking based on average complementarity score. The complementarity score is calculated for each posaconazole conformation and is averaged on the ten conformations in the last column.

| Coformer                  | Posaconazole Conformations |      |      |      |      |      |      |      |      |      | Average            |
|---------------------------|----------------------------|------|------|------|------|------|------|------|------|------|--------------------|
|                           | 1                          | 2    | 3    | 4    | 5    | 6    | 7    | 8    | 9    | 10   | C <sub>score</sub> |
| Ferulic acid              | 2.79                       | 2.79 | 2.56 | 2.92 | 3.18 | 3.25 | 3.07 | 3.18 | 2.65 | 3.36 | 2.98               |
| Adipic acid               | 2.47                       | 3.12 | 2.89 | 2.62 | 2.96 | 3.58 | 3.40 | 3.40 | 2.97 | 3.69 | 3.11               |
| Xinafoic acid             | 2.69                       | 3.33 | 3.10 | 2.83 | 3.17 | 3.79 | 3.61 | 3.61 | 3.19 | 3.90 | 3.32               |
| 4-Aminobenzoic acid       | 2.79                       | 3.43 | 3.20 | 2.93 | 3.28 | 3.89 | 3.71 | 3.71 | 3.29 | 4.00 | 3.42               |
| Benzoic acid              | 2.85                       | 3.50 | 3.26 | 2.99 | 3.34 | 3.95 | 3.77 | 3.77 | 3.35 | 4.07 | 3.49               |
| 3,4-dihydroxybenzoic acid | 3.25                       | 3.44 | 3.21 | 3.38 | 3.64 | 3.90 | 3.72 | 3.72 | 3.30 | 4.01 | 3.56               |
| Nicotinamide              | 3.14                       | 3.55 | 3.32 | 3.28 | 3.53 | 4.01 | 3.84 | 3.83 | 3.41 | 4.12 | 3.60               |
| Nicotinic acid            | 3.06                       | 3.70 | 3.47 | 3.20 | 3.54 | 4.16 | 3.98 | 3.98 | 3.56 | 4.28 | 3.69               |

| Coformer       | Posaconazole Conformations |      |      |      |      |      |      |      |      |      | Average            |
|----------------|----------------------------|------|------|------|------|------|------|------|------|------|--------------------|
|                | 1                          | 2    | 3    | 4    | 5    | 6    | 7    | 8    | 9    | 10   | C <sub>score</sub> |
| Ferulic acid   | 2.79                       | 2.79 | 2.56 | 2.92 | 3.18 | 3.25 | 3.07 | 3.18 | 2.65 | 3.36 | 2.98               |
| Fumaric acid   | 3.39                       | 3.73 | 3.50 | 3.52 | 3.78 | 4.19 | 4.01 | 4.01 | 3.59 | 4.30 | 3.80               |
| Vanillin       | 3.51                       | 3.73 | 3.50 | 3.63 | 3.90 | 4.20 | 4.02 | 4.01 | 3.59 | 4.31 | 3.84               |
| Salicylic acid | 3.45                       | 3.82 | 3.58 | 3.58 | 3.83 | 4.27 | 4.09 | 4.09 | 3.66 | 4.39 | 3.88               |
| Succinic acid  | 3.27                       | 3.92 | 3.69 | 3.42 | 3.76 | 4.38 | 4.20 | 4.20 | 3.77 | 4.49 | 3.91               |
| Maleic acid    | 3.98                       | 3.79 | 3.55 | 4.10 | 4.36 | 4.24 | 4.06 | 4.36 | 3.64 | 4.36 | 4.04               |
| Malic acid     | 3.91                       | 4.03 | 3.79 | 4.03 | 4.29 | 4.48 | 4.31 | 4.30 | 3.88 | 4.60 | 4.16               |
| Gentisic acid  | 3.82                       | 4.08 | 3.85 | 3.94 | 4.20 | 4.54 | 4.36 | 4.36 | 3.94 | 4.66 | 4.18               |
| Citric acid    | 3.58                       | 4.21 | 3.98 | 3.71 | 4.05 | 4.67 | 4.49 | 4.49 | 4.07 | 4.78 | 4.20               |
| Pyridoxine     | 3.65                       | 4.29 | 4.06 | 3.79 | 4.13 | 4.75 | 4.57 | 4.57 | 4.14 | 4.86 | 4.28               |
| Vanillic acid  | 4.00                       | 4.34 | 4.11 | 4.13 | 4.39 | 4.80 | 4.62 | 4.62 | 4.20 | 4.91 | 4.41               |
| Xylitol        | 4.66                       | 4.34 | 4.10 | 4.79 | 5.05 | 4.86 | 4.45 | 5.05 | 4.28 | 3.89 | 4.55               |
| L-proline      | 3.92                       | 4.56 | 4.33 | 4.06 | 4.40 | 5.02 | 4.84 | 4.84 | 4.41 | 5.13 | 4.55               |
| Maltol         | 4.06                       | 4.68 | 4.45 | 4.18 | 4.52 | 5.14 | 4.96 | 4.95 | 4.53 | 5.25 | 4.67               |
| Mannitol       | 4.89                       | 4.56 | 4.33 | 5.01 | 5.28 | 5.09 | 4.83 | 5.28 | 4.51 | 5.11 | 4.89               |

| Coformer            | Posaconazole Conformations |      |      |      |      |      |      |      |      |      | Average            |
|---------------------|----------------------------|------|------|------|------|------|------|------|------|------|--------------------|
|                     | 1                          | 2    | 3    | 4    | 5    | 6    | 7    | 8    | 9    | 10   | C <sub>score</sub> |
| Ferulic acid        | 2.79                       | 2.79 | 2.56 | 2.92 | 3.18 | 3.25 | 3.07 | 3.18 | 2.65 | 3.36 | 2.98               |
| trans-Aconitic acid | 4.35                       | 4.99 | 4.76 | 4.49 | 4.83 | 5.45 | 5.27 | 5.27 | 4.84 | 5.56 | 4.98               |
| L-Lactic acid       | 5.13                       | 5.49 | 5.26 | 5.27 | 5.52 | 5.95 | 5.77 | 5.77 | 5.34 | 6.06 | 5.56               |
| Oxalic acid         | 5.17                       | 5.51 | 5.28 | 5.30 | 5.55 | 5.97 | 5.79 | 5.79 | 5.36 | 6.08 | 5.58               |
| L-Tartaric acid     | 5.46                       | 5.58 | 5.34 | 5.58 | 5.84 | 6.03 | 5.85 | 5.85 | 5.43 | 6.15 | 5.71               |
| Urea                | 5.53                       | 6.17 | 5.94 | 5.67 | 6.01 | 6.63 | 6.45 | 6.45 | 6.02 | 6.74 | 6.16               |
